# Supplementary material
Source: Preprints.org preprint supplement (doi:10.20944/preprints202008.0545.v1)

# Calculations for Two Nested Limit Cycles in Two-Species Reactions with Wolfram Mathematica

Created by Ilona Nagy, Valery Romanovski and János Tóth

Last modified: 24 August, 2020

## Model 1 with a stable outer and an unstable inner limit cycle

---

### Preparations

#### System (3)

$$\begin{aligned}x' &= x^2 y + x y - c_1 x^2 - d_1 x + e_1 y + f_1 \\y' &= -x^2 y - x y + c_1 x^2 + d_2 x - e_2 y + f_2\end{aligned}$$

$$c_1, d_1, d_2, e_1, e_2, f_1, f_2 \geq 0$$

#### The ReactionKinetics program package

The ReactionKinetics program package is available at <http://extras.springer.com> (ISBN: 978-1-4939-8643-9).

It can be used if either ReactionKinetics.m is put in the same folder as this notebook or ReactionKinetics.wl is added in the packages in the applications.

In[ ]:= **Quit**

In[ ]:=

```
SetDirectory[NotebookDirectory[]];
SetOptions[#, AxesStyle -> Arrowheads[Automatic]] & /@
{ContourPlot, DateListPlot, Plot, ListLinePlot, ListPlot, ListLogPlot,
LogLinearPlot, LogPlot, ParametricPlot, Plot3D, RegionPlot};
LaunchKernels[];
Needs["ReactionKinetics`"];
```

... LaunchKernels: Some subkernels are already running. Not launching default kernels again.

## Figure 1: Creating the reaction graph with the help of the ReactionKinetics package

```

In[ ]:= ClearAll[model1];
model1 = {2 X + Y -> 3 X, X -> 0, 2 X -> X + Y -> 2 X, 0 -> X -> X + Y, 0 -> Y -> X + Y, Y -> 0};
RightHandSide[{model1}, {1, d1, c1, 1, f1, d2, f2, e1, e2}, {x, y}]
model1fig = ShowFHJGraph[model1, {1, d1, c1, 1, f1, d2, f2, e1, e2}, DirectedEdges -> True,
  VertexLabels -> Automatic, EdgeLabelStyle -> Directive[Red, Italic, 16],
  VertexLabelStyle -> Directive[Blue, 16], GraphLayout -> "TutteEmbedding"]
Out[ ]:= {f1 - d1 x - c1 x^2 + e1 y + x y + x^2 y, f2 + d2 x + c1 x^2 - e2 y - x y - x^2 y}

```

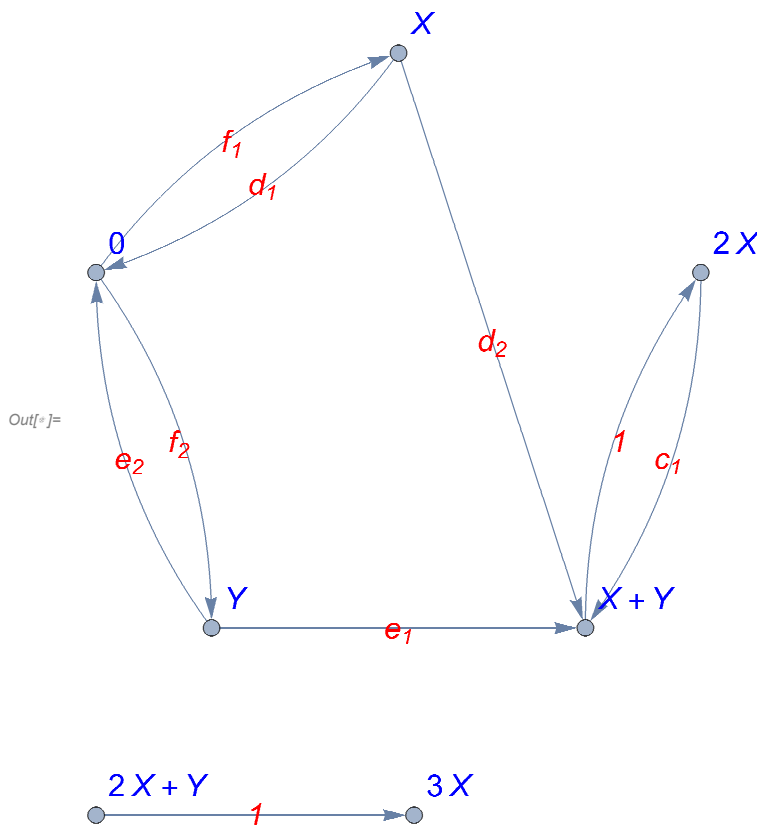

```

In[ ]:= Export["Fig-1-Model1.pdf", model1fig]

```

Out[ ]:= Fig-1-Model1.pdf

## The singular point is shifted into the origin

Equations (4)-(5): Singular points if  $x_0 = 1$

```

In[ ]:= Quit

```

```
In[ ]:= ClearAll[xd, yd, x, y, c1, d1, d2, e1, e2, f1, f2];
xd = x^2 y + x y - c1 x^2 - d1 x + e1 y + f1;
yd = -x^2 y - x y + c1 x^2 + d2 x - e2 y + f2;
Solve[{xd == 0, yd == 0} /. x -> 1, {d1, y}] // FullSimplify
```

$$\text{Out[ ]:= } \left\{ \left\{ d1 \rightarrow \frac{d2 (2 + e1) + c1 (e1 - e2) + (2 + e2) f1 + (2 + e1) f2}{2 + e2}, y \rightarrow \frac{c1 + d2 + f2}{2 + e2} \right\} \right\}$$

Equation (6): The singular point (if  $x_0 = 1$ ) is shifted into  $(0, 0)$

```
In[ ]:= ClearAll[xd, yd, x, y, c1, d1, d2, e1, e2, f1, f2, x0, y0, x1d, y1d, xx1, yy1];
xd = x^2 y + x y - c1 x^2 - d1 x + e1 y + f1;
yd = -x^2 y - x y + c1 x^2 + d2 x - e2 y + f2;
x0 = 1;
d1 = \frac{d2 (2 + e1) + c1 (e1 - e2) + (2 + e2) f1 + (2 + e1) f2}{2 + e2}; y0 = \frac{c1 + d2 + f2}{2 + e2};
xx1 = x - x0; yy1 = y - y0;
x1d = D[xx1, x] xd + D[xx1, y] yd /. {x -> x1 + x0, y -> y1 + y0} // Factor
y1d = D[yy1, x] xd + D[yy1, y] yd /. {x -> x1 + x0, y -> y1 + y0} // Factor
```

$$\text{Out[ ]:= } -\frac{1}{2 + e2} \left( c1 x1 - d2 x1 + c1 e1 x1 + d2 e1 x1 + c1 e2 x1 + 2 f1 x1 + e2 f1 x1 - f2 x1 + e1 f2 x1 + c1 x1^2 - d2 x1^2 + c1 e2 x1^2 - f2 x1^2 - 4 y1 - 2 e1 y1 - 2 e2 y1 - e1 e2 y1 - 6 x1 y1 - 3 e2 x1 y1 - 2 x1^2 y1 - e2 x1^2 y1 \right)$$

$$\text{Out[ ]:= } -\frac{1}{2 + e2} \left( -c1 x1 + d2 x1 - 2 c1 e2 x1 - d2 e2 x1 + 3 f2 x1 - c1 x1^2 + d2 x1^2 - c1 e2 x1^2 + f2 x1^2 + 4 y1 + 4 e2 y1 + e2^2 y1 + 6 x1 y1 + 3 e2 x1 y1 + 2 x1^2 y1 + e2 x1^2 y1 \right)$$

## The Jacobian at the origin

Equations (7)-(8)

```
In[ ]:= Jac = D[{x1d, y1d}, {{x1, y1}}];
JacOrigin = Jac /. {x1 -> 0, y1 -> 0} // Simplify
```

$$\text{Out[ ]:= } \left\{ \left\{ -\frac{d2 (-1 + e1) + c1 (1 + e1 + e2) + 2 f1 + e2 f1 - f2 + e1 f2}{2 + e2}, 2 + e1 \right\}, \left\{ \frac{c1 + d2 (-1 + e2) + 2 c1 e2 - 3 f2}{2 + e2}, -2 - e2 \right\} \right\}$$

```
In[ ]:= trace = Tr[JacOrigin] // Factor
Solve[trace == 0, c1] // FullSimplify
```

$$\text{Out[ ]:= } -\frac{4 + c1 - d2 + c1 e1 + d2 e1 + 4 e2 + c1 e2 + e2^2 + 2 f1 + e2 f1 - f2 + e1 f2}{2 + e2}$$

$$\text{Out[ ]:= } \left\{ \left\{ c1 \rightarrow \frac{d2 - d2 e1 - (2 + e2) (2 + e2 + f1) + f2 - e1 f2}{1 + e1 + e2} \right\} \right\}$$

$$\text{In[*]:= } c1 = \frac{d2 - d2 e1 - (2 + e2) (2 + e2 + f1) + f2 - e1 f2}{1 + e1 + e2};$$

**evalues = Eigenvalues [JacOrigin] // FullSimplify**

$$\text{Out[*]:= } \left\{ -\frac{1}{\sqrt{1 + e1 + e2}} i \sqrt{(-e2 (2 d2 + e2 + e2^2 - 4 f1) + 2 (e2 + f1 + f2) + e1^2 (d2 + 2 f2) + e1 (-2 - d2 (-2 + e2) + e2 + e2^2 + f1 + 2 e2 f1 + 5 f2))}, \right. \\ \left. \frac{1}{\sqrt{1 + e1 + e2}} i \sqrt{(-e2 (2 d2 + e2 + e2^2 - 4 f1) + 2 (e2 + f1 + f2) + e1^2 (d2 + 2 f2) + e1 (-2 - d2 (-2 + e2) + e2 + e2^2 + f1 + 2 e2 f1 + 5 f2))} \right\}$$

## Equation (9)

**beta = -evalues[[1]]<sup>2</sup> // Factor**

$$\text{Out[*]:= } \frac{1}{1 + e1 + e2} (-2 e1 + 2 d2 e1 + d2 e1^2 + 2 e2 - 2 d2 e2 + e1 e2 - d2 e1 e2 - e2^2 + e1 e2^2 - e2^3 + 2 f1 + e1 f1 + 4 e2 f1 + 2 e1 e2 f1 + 2 f2 + 5 e1 f2 + 2 e1^2 f2)$$

## System (10)

**pp = x1d /. {x1 → x, y1 → y} // Factor**

**qq = y1d /. {x1 → x, y1 → y} // Factor**

$$\text{Out[*]:= } \frac{1}{1 + e1 + e2} (2 x + 2 e1 x + 3 e2 x + e1 e2 x + e2^2 x + 2 x^2 + d2 e1 x^2 + 3 e2 x^2 + e2^2 x^2 + f1 x^2 + e2 f1 x^2 + e1 f2 x^2 + 2 y + 3 e1 y + e1^2 y + 2 e2 y + e1 e2 y + 3 x y + 3 e1 x y + 3 e2 x y + x^2 y + e1 x^2 y + e2 x^2 y)$$

$$\text{Out[*]:= } -\frac{1}{1 + e1 + e2} (2 x + d2 e1 x + 5 e2 x - d2 e2 x + 2 e2^2 x + f1 x + 2 e2 f1 x + f2 x + 2 e1 f2 x + 2 x^2 + d2 e1 x^2 + 3 e2 x^2 + e2^2 x^2 + f1 x^2 + e2 f1 x^2 + e1 f2 x^2 + 2 y + 2 e1 y + 3 e2 y + e1 e2 y + e2^2 y + 3 x y + 3 e1 x y + 3 e2 x y + x^2 y + e1 x^2 y + e2 x^2 y)$$

# Lyapunov's theorem

## System (10)

**Quit**

$$\text{In[*]:= } pp = \frac{1}{1 + e1 + e2} (2 x + 2 e1 x + 3 e2 x + e1 e2 x + e2^2 x + 2 x^2 + d2 e1 x^2 + 3 e2 x^2 + e2^2 x^2 + f1 x^2 + e2 f1 x^2 + e1 f2 x^2 + 2 y + 3 e1 y + e1^2 y + 2 e2 y + e1 e2 y + 3 x y + 3 e1 x y + 3 e2 x y + x^2 y + e1 x^2 y + e2 x^2 y);$$

$$qq = -\frac{1}{1 + e1 + e2} (2 x + d2 e1 x + 5 e2 x - d2 e2 x + 2 e2^2 x + f1 x + 2 e2 f1 x + f2 x + 2 e1 f2 x + 2 x^2 + d2 e1 x^2 + 3 e2 x^2 + e2^2 x^2 + f1 x^2 + e2 f1 x^2 + e1 f2 x^2 + 2 y + 2 e1 y + 3 e2 y + e1 e2 y + e2^2 y + 3 x y + 3 e1 x y + 3 e2 x y + x^2 y + e1 x^2 y + e2 x^2 y);$$

## Program

```

In[ ]:= Ser[s_] := Plus@@Table[x^i y^{s-i} p[i, s-i], {i, 0, s}];
Hom[s_] := Table[p[s-i, i], {i, 0, s}];
hh = Sum[Ser[i], {i, 2, 6}]; (*9*)
Lie = D[hh, x] pp + D[hh, y] qq // Expand;
RHS = g1 (x^2 + y^2)^2 + g2 (x^2 + y^2)^3 + g3 (x^2 + y^2)^4 // Expand;
vv = Lie - RHS // Expand;
CoefPol[f_, s_] :=
  Module[{m, lis, t}, lis = {}; m = Expand[f]; Do[Do[If[i+j == s, lis = AppendTo[lis,
    Coefficient[m, x^i y^j] /. {x -> 0, y -> 0, z -> 0}], {i, 0, s}], {j, 0, s}];
  lis[s] = lis];
Do[CoefPol[vv, i], {i, 1, 9}];

```

## Degree 1, 2

```

In[ ]:= ls[1]
ls[2] // Factor;
sol2 = Solve[ls[2] == 0, Hom[2]] // Simplify;
{p[2, 0], p[1, 1], p[0, 2]} = {p[2, 0], p[1, 1], p[0, 2]} /. sol2[[1]];
ls[2] // Simplify

```

Out[ ]:= {0, 0}

 **Solve:** Equations may not give solutions for all "solve" variables.

Out[ ]:= {0, 0, 0}

## Quadratic form

```
In[ ]:= ClearAll[qv, mat, a11, det, eg];
qv = Ser[2] // FullSimplify
mat = 1/2 D[qv, {{x, y}, 2}];
mat // MatrixForm
a11 = mat[[1, 1]]
det = Det[mat] // Factor
eg = Eigenvalues[mat] // Simplify // Factor;
```

$$\text{Out[ ]} = \frac{1}{2} \left( \frac{(d2 (e1 - e2) + (1 + 2 e2) (2 + e2 + f1) + f2 + 2 e1 f2) x^2}{(2 + e2) (1 + e1 + e2)} + 2 x y + \frac{(2 + e1) y^2}{2 + e2} \right) p[1, 1]$$

Out[ ]//MatrixForm=

$$\left( \begin{array}{cc} \frac{(d2 (e1 - e2) + (1 + 2 e2) (2 + e2 + f1) + f2 + 2 e1 f2) p[1, 1]}{2 (2 + e2) (1 + e1 + e2)} & \frac{1}{2} p[1, 1] \\ \frac{1}{2} p[1, 1] & \frac{(2 + e1) p[1, 1]}{2 (2 + e2)} \end{array} \right)$$

$$\text{Out[ ]} = \frac{(d2 (e1 - e2) + (1 + 2 e2) (2 + e2 + f1) + f2 + 2 e1 f2) p[1, 1]}{2 (2 + e2) (1 + e1 + e2)}$$

$$\text{Out[ ]} = - \frac{1}{4 (2 + e2)^2 (1 + e1 + e2)} (2 e1 - 2 d2 e1 - d2 e1^2 - 2 e2 + 2 d2 e2 - e1 e2 + d2 e1 e2 + e2^2 - e1 e2^2 + e2^3 - 2 f1 - e1 f1 - 4 e2 f1 - 2 e1 e2 f1 - 2 f2 - 5 e1 f2 - 2 e1^2 f2) p[1, 1]^2$$

## Equation (13)

```
In[ ]:= p[1, 1] = 1;
qv
mat // MatrixForm
a11
det
```

$$\text{Out[ ]} = \frac{1}{2} \left( \frac{(d2 (e1 - e2) + (1 + 2 e2) (2 + e2 + f1) + f2 + 2 e1 f2) x^2}{(2 + e2) (1 + e1 + e2)} + 2 x y + \frac{(2 + e1) y^2}{2 + e2} \right)$$

Out[ ]//MatrixForm=

$$\left( \begin{array}{cc} \frac{d2 (e1 - e2) + (1 + 2 e2) (2 + e2 + f1) + f2 + 2 e1 f2}{2 (2 + e2) (1 + e1 + e2)} & \frac{1}{2} \\ \frac{1}{2} & \frac{2 + e1}{2 (2 + e2)} \end{array} \right)$$

$$\text{Out[ ]} = \frac{d2 (e1 - e2) + (1 + 2 e2) (2 + e2 + f1) + f2 + 2 e1 f2}{2 (2 + e2) (1 + e1 + e2)}$$

$$\text{Out[ ]} = - \frac{1}{4 (2 + e2)^2 (1 + e1 + e2)} (2 e1 - 2 d2 e1 - d2 e1^2 - 2 e2 + 2 d2 e2 - e1 e2 + d2 e1 e2 + e2^2 - e1 e2^2 + e2^3 - 2 f1 - e1 f1 - 4 e2 f1 - 2 e1 e2 f1 - 2 f2 - 5 e1 f2 - 2 e1^2 f2)$$

## Conditions for a positive definite quadratic form

$$\begin{aligned} \text{In}[^*]:= \text{d1} &= \frac{\text{d2} (2 + \text{e1}) + \text{c1} (\text{e1} - \text{e2}) + (2 + \text{e2}) \text{f1} + (2 + \text{e1}) \text{f2}}{2 + \text{e2}}; \text{y0} = \frac{\text{c1} + \text{d2} + \text{f2}}{2 + \text{e2}}; \\ \text{c1} &= \frac{\text{d2} - \text{d2} \text{e1} - (2 + \text{e2}) (2 + \text{e2} + \text{f1}) + \text{f2} - \text{e1} \text{f2}}{1 + \text{e1} + \text{e2}}; \\ \text{beta} &= \frac{1}{1 + \text{e1} + \text{e2}} \left( -2 \text{e1} + 2 \text{d2} \text{e1} + \text{d2} \text{e1}^2 + 2 \text{e2} - 2 \text{d2} \text{e2} + \text{e1} \text{e2} - \text{d2} \text{e1} \text{e2} - \right. \\ &\quad \left. \text{e2}^2 + \text{e1} \text{e2}^2 - \text{e2}^3 + 2 \text{f1} + \text{e1} \text{f1} + 4 \text{e2} \text{f1} + 2 \text{e1} \text{e2} \text{f1} + 2 \text{f2} + 5 \text{e1} \text{f2} + 2 \text{e1}^2 \text{f2} \right); \end{aligned}$$

```
In[^*]:= Reduce [ a11 > 0 && det > 0 && beta > 0 && y0 > 0 && c1 > 0 && d1 > 0 && d2 > 0 &&
e1 > 0 && e2 > 0 && f1 > 0 && f2 > 0, {d2, e1, e2, f1, f2} ] // FullSimplify
```

```
Out[^*]:= $Aborted
```

## Setting f1 and f2: Equation (14)

```
In[^*]:= ClearAll[f1, f2];
```

```
f1 = 1; f2 = 2;
```

```
In[^*]:= Reduce [ a11 > 0 && det > 0 && beta > 0 && y0 > 0 && c1 > 0 && d1 > 0 && d2 > 0 && e1 > 0 && e2 > 0,
{d2, e1, e2} ] // FullSimplify
```

```
Out[^*]:= (e2 > 0 && Sqrt[9 + 4 d2 - 4 (2 + d2) e1] > 5 + 2 e2 &&
( (e1 > 0 && d2 > 4 && 9 d2 ≤ 26 + 7 Sqrt[34] ) || ( 9 d2 > 26 + 7 Sqrt[34] && Root [110 + 52 d2 - 9 d2^2 +
(69 + 64 d2 + 9 d2^2) #1 + (-12 - 8 d2) #1^2 + 4 #1^3 &, 1] ≤ e1 < Sqrt[110 + 52 d2 - 9 d2^2 +
(69 + 64 d2 + 9 d2^2) #1 + (-12 - 8 d2) #1^2 + 4 #1^3 &, 1] ) &&
(0 < e1 < Root [110 + 52 d2 - 9 d2^2 + (69 + 64 d2 + 9 d2^2) #1 + (-12 - 8 d2) #1^2 + 4 #1^3 &, 1] &&
0 < e2 < Root [-6 - 9 e1 - 2 d2 e1 - 4 e1^2 - d2 e1^2 +
(-6 + 2 d2 - 3 e1 + d2 e1) #1 + (1 - e1) #1^2 + #1^3 &, 1] && 9 d2 > 26 + 7 Sqrt[34] )
```

## Degree 3

```
In[^*]:= ls[3] // Factor;
```

```
sol3 = Solve[ls[3] == 0, Hom[3]] // Simplify;
```

```
{p[3, 0], p[2, 1], p[1, 2], p[0, 3]} =
```

```
{p[3, 0], p[2, 1], p[1, 2], p[0, 3]} /. sol3[[1]] // Factor;
```

```
ls[3] // Simplify
```

```
Out[^*]:= {0, 0, 0, 0}
```

## Degree 4: Equation (15)

```
In[ ]:= ls[4] // Factor;
sol4 = Solve[ls[4] == 0, AppendTo[Hom[4], g1]];
{g1, p[4, 0], p[3, 1], p[2, 2], p[1, 3], p[0, 4]} =
  {g1, p[4, 0], p[3, 1], p[2, 2], p[1, 3], p[0, 4]} /. sol4[[1]];
g1 //
Factor
```

... Solve: Equations may not give solutions for all "solve" variables.

```
Out[ ]:= (-36 - 105 e1 - 30 d2 e1 - 120 e1^2 - 50 d2 e1^2 - 6 d2^2 e1^2 - 56 e1^3 - 28 d2 e1^3 - 7 d2^2 e1^3 -
  6 e1^4 - 6 d2 e1^4 - 2 d2^2 e1^4 - 75 e2 + 12 d2 e2 - 159 e1 e2 - 8 d2 e1 e2 + 6 d2^2 e1 e2 -
  113 e1^2 e2 - 9 d2 e1^2 e2 + 7 d2^2 e1^2 e2 - 18 e1^3 e2 - d2 e1^3 e2 + 2 d2^2 e1^3 e2 - 36 e2^2 +
  13 d2 e2^2 - 65 e1 e2^2 + 18 d2 e1 e2^2 - 30 e1^2 e2^2 - 6 e1^3 e2^2 - 4 d2 e1^3 e2^2 + 9 e2^3 + d2 e2^3 -
  6 e1 e2^3 + 7 d2 e1 e2^3 - e1^2 e2^3 + 4 d2 e1^2 e2^3 + 6 e2^4 + 7 e1 e2^4 - 2 e1^2 e2^4 + 2 e1 e2^5) /
  ((2 + e2) (123 + 234 e1 + 34 d2 e1 + 137 e1^2 + 30 d2 e1^2 + 3 d2^2 e1^2 + 26 e1^3 + 2 d2 e1^3 + 3 e1^4 + 330
    e2 - 34 d2 e2 + 348 e1 e2 + 16 d2 e1 e2 - 6 d2^2 e1 e2 + 68 e1^2 e2 + 6 e1^3 e2 + 307 e2^2 - 46 d2 e2^2 +
    3 d2^2 e2^2 + 126 e1 e2^2 + 10 d2 e1 e2^2 + 11 e1^2 e2^2 + 116 e2^3 - 12 d2 e2^3 + 12 e1 e2^3 + 16 e2^4))
```

```
In[ ]:= Variables[g1]
```

```
Out[ ]:= {e2, e1, d2}
```

## Degree 5

```
In[ ]:= ls[5] // Factor;
sol5 = Solve[ls[5] == 0, Hom[5]];
{p[5, 0], p[4, 1], p[3, 2], p[2, 3], p[1, 4], p[0, 5]} =
  {p[5, 0], p[4, 1], p[3, 2], p[2, 3], p[1, 4], p[0, 5]} /. sol5[[1]] // Factor;
ls[5] // Factor
```

```
Out[ ]:= {0, 0, 0, 0, 0, 0}
```

## Degree 6

```
In[ ]:= ls[6] // Factor;
sol6 = Solve[ls[6] == 0, AppendTo[Hom[6], g2]];
{p[6, 0], p[5, 1], p[4, 2], p[3, 3], p[2, 4], p[1, 5], p[0, 6], g2} =
  {p[6, 0], p[5, 1], p[4, 2], p[3, 3], p[2, 4], p[1, 5], p[0, 6], g2} /. sol6[[1]] // Factor;
```

... Solve: Equations may not give solutions for all "solve" variables.



In[ ]:= g2

Variables[g2]

$$\text{Out[ ]:= } \frac{(-8713008 - 80227908 e_1 - 18633240 d_2 e_1 - 337874976 e_1^2 - 157906260 d_2 e_1^2 + \dots 3685 \dots + 288 d_2 e_1 e_2^{19} p[2, 2] + 864 e_1^2 e_2^{19} p[2, 2] - 384 e_1 e_2^{20} p[2, 2])}{(3 \dots 5 \dots (173 + 310 e_1 + 46 d_2 e_1 + 159 e_1^2 + 34 d_2 e_1^2 + 5 d_2^2 e_1^2 + 22 e_1^3 - 2 d_2 e_1^3 + \dots 14 \dots + 194 e_1 e_2^2 + 22 d_2 e_1 e_2^2 + 13 e_1^2 e_2^2 + 204 e_2^3 - 20 d_2 e_2^3 + 20 e_1 e_2^3 + 32 e_2^4))}$$

large output

[show less](#)[show more](#)[show all](#)[set size limit...](#)

Out[ ]:= {e2, e1, d2, p[2, 2]}

In[ ]:= p[2, 2] = 0;

g2

$$\text{Out[ ]:= } (-8713008 - 80227908 e_1 - 18633240 d_2 e_1 - 337874976 e_1^2 - 157906260 d_2 e_1^2 + 10405584 d_2^2 e_1^2 - 85833669 e_1^3 - 589383162 d_2 e_1^3 + 81932364 d_2^2 e_1^3 + 35785800 d_2^3 e_1^3 - 1455557742 e_1^4 - 1270911195 d_2 e_1^4 + 338227632 d_2^2 e_1^4 + 238457340 d_2^3 e_1^4 + 26009424 d_2^4 e_1^4 - 1714693617 e_1^5 - 1717841574 d_2 e_1^5 + 904365423 d_2^2 e_1^5 + 745432494 d_2^3 e_1^5 + 150039924 d_2^4 e_1^5 + 8948856 d_2^5 e_1^5 - 1403037225 e_1^6 - 1430020437 d_2 e_1^6 + 1658108088 d_2^2 e_1^6 + 1429256853 d_2^3 e_1^6 + 394437648 d_2^4 e_1^6 + 44281668 d_2^5 e_1^6 + 1629936 d_2^6 e_1^6 - 753154923 e_1^7 - 571000407 d_2 e_1^7 + 2138076514 d_2^2 e_1^7 + 1847954158 d_2^3 e_1^7 + 619008217 d_2^4 e_1^7 + 97449906 d_2^5 e_1^7 + 6784644 d_2^6 e_1^7 + 151896 d_2^7 e_1^7 - 201488607 e_1^8 + 176674539 d_2 e_1^8 + 1964402861 d_2^2 e_1^8 + 1675435460 d_2^3 e_1^8 + 637982800 d_2^4 e_1^8 + 124624471 d_2^5 e_1^8 + 12217264 d_2^6 e_1^8 + 516884 d_2^7 e_1^8 + 5664 d_2^8 e_1^8 + 45046070 e_1^9 + 410515867 d_2 e_1^9 + 1291006512 d_2^2 e_1^9 + 1078650079 d_2^3 e_1^9 + 448156039 d_2^4 e_1^9 + 101413810 d_2^5 e_1^9 + 12361701 d_2^6 e_1^9 + 734362 d_2^7 e_1^9 + 15104 d_2^8 e_1^9 + 73953039 e_1^{10} + 290416646 d_2 e_1^{10} + 605333406 d_2^2 e_1^{10} + 491519448 d_2^3 e_1^{10} + 216082317 d_2^4 e_1^{10} + 54029895 d_2^5 e_1^{10} + 7614724 d_2^6 e_1^{10} + 559151 d_2^7 e_1^{10} + 16048 d_2^8 e_1^{10} + 39444242 e_1^{11} + 124911469 d_2 e_1^{11} + 202103664 d_2^2 e_1^{11} + 156681114 d_2^3 e_1^{11} + 70584675 d_2^4 e_1^{11} + 18688281 d_2^5 e_1^{11} + 2880292 d_2^6 e_1^{11} + 241766 d_2^7 e_1^{11} + 8496 d_2^8 e_1^{11} + 13797268 e_1^{12} + 37546770 d_2 e_1^{12} + 48855466 d_2^2 e_1^{12} + 34754854 d_2^3 e_1^{12} + 15245395 d_2^4 e_1^{12} + 4031419 d_2^5 e_1^{12} + 637195 d_2^6 e_1^{12} + 56978 d_2^7 e_1^{12} + 2242 d_2^8 e_1^{12} + 3612332 e_1^{13} + 8545648 d_2 e_1^{13} + 9068950 d_2^2 e_1^{13} + 5576280 d_2^3 e_1^{13} + 2166702 d_2^4 e_1^{13} + 509183 d_2^5 e_1^{13} + 72324 d_2^6 e_1^{13} + 6043 d_2^7 e_1^{13} + 236 d_2^8 e_1^{13} + 683128 e_1^{14} + 1465890 d_2 e_1^{14} + 1361350 d_2^2 e_1^{14} + 717156 d_2^3 e_1^{14} + 224683 d_2^4 e_1^{14} + 38432 d_2^5 e_1^{14} + 3266 d_2^6 e_1^{14} + 110 d_2^7 e_1^{14} + 75592 e_1^{15} + 159856 d_2 e_1^{15} + 144656 d_2^2 e_1^{15} + 71084 d_2^3 e_1^{15} + 19220 d_2^4 e_1^{15} + 2527 d_2^5 e_1^{15} + 120 d_2^6 e_1^{15} + 3360 e_1^{16} + 7560 d_2 e_1^{16} + 7000 d_2^2 e_1^{16} + 3290 d_2^3 e_1^{16} + 770 d_2^4 e_1^{16} + 70 d_2^5 e_1^{16} - 88993404 e_2 + 13996800 d_2 e_2 - 752016960 e_1 e_2 - 38543688 d_2 e_1 e_2 + 27026784 d_2^2 e_1 e_2 - 2879856747 e_1^2 e_2 - 710317836 d_2 e_1^2 e_2 + 294699708 d_2^2 e_1^2 e_2 - 9078480 d_2^3 e_1^2 e_2 - 6560854011 e_1^3 e_2 - 2690010594 d_2 e_1^3 e_2 + 1362536496 d_2^2 e_1^3 e_2 + 170160336 d_2^3 e_1^3 e_2 - 32737824 d_2^4 e_1^3 e_2 - 9773607069 e_1^4 e_2 - 5096266209 d_2 e_1^4 e_2 + 3886383267 d_2^2 e_1^4 e_2 + 1154539896 d_2^3 e_1^4 e_2 - 54369156 d_2^4 e_1^4 e_2 - 19467744 d_2^5 e_1^4 e_2 - 9794939382 e_1^5 e_2 - 5333357403 d_2 e_1^5 e_2 + 7619896587 d_2^2 e_1^5 e_2 + 3266720088 d_2^3 e_1^5 e_2 + 168392016 d_2^4 e_1^5 e_2 - 61122504 d_2^5 e_1^5 e_2 - 5049888 d_2^6 e_1^5 e_2 - 6441412836 e_1^6 e_2 - 2449443015 d_2 e_1^6 e_2 + 10571887718 d_2^2 e_1^6 e_2 + 5438835483 d_2^3 e_1^6 e_2 + 695706763 d_2^4 e_1^6 e_2 - 66594060 d_2^5 e_1^6 e_2 - 16669884 d_2^6 e_1^6 e_2 -$$

$$\begin{aligned}
& 613\,584\,d^2\,e^6\,e^2 - 2\,414\,718\,978\,e^7\,e^2 + 1\,016\,061\,140\,d^2\,e^7\,e^2 + 10\,416\,164\,334\,d^2\,e^7\,e^2 + \\
& 5\,901\,303\,257\,d^3\,e^7\,e^2 + 1\,107\,789\,093\,d^4\,e^7\,e^2 - 9\,732\,938\,d^5\,e^7\,e^2 - 23\,271\,568\,d^6\,e^7\,e^2 - \\
& 1\,881\,280\,d^7\,e^7\,e^2 - 28\,320\,d^8\,e^7\,e^2 - 110\,539\,434\,e^8\,e^2 + 2\,330\,972\,212\,d^2\,e^8\,e^2 + \\
& 7\,229\,319\,646\,d^2\,e^8\,e^2 + 4\,318\,013\,999\,d^3\,e^8\,e^2 + 1\,012\,688\,955\,d^4\,e^8\,e^2 + \\
& 44\,466\,269\,d^5\,e^8\,e^2 - 17\,803\,635\,d^6\,e^8\,e^2 - 2\,428\,832\,d^7\,e^8\,e^2 - 75\,520\,d^8\,e^8\,e^2 + \\
& 405\,218\,849\,e^9\,e^2 + 1\,664\,150\,341\,d^2\,e^9\,e^2 + 3\,470\,424\,720\,d^2\,e^9\,e^2 + 2\,130\,918\,642\,d^3\,e^9\,e^2 + \\
& 576\,913\,058\,d^4\,e^9\,e^2 + 46\,399\,843\,d^5\,e^9\,e^2 - 8\,101\,763\,d^6\,e^9\,e^2 - 1\,701\,260\,d^7\,e^9\,e^2 - \\
& 80\,240\,d^8\,e^9\,e^2 + 239\,910\,826\,e^{10}\,e^2 + 679\,422\,209\,d^2\,e^{10}\,e^2 + 1\,120\,948\,905\,d^2\,e^{10}\,e^2 + \\
& 691\,162\,347\,d^3\,e^{10}\,e^2 + 205\,066\,302\,d^4\,e^{10}\,e^2 + 21\,531\,455\,d^5\,e^{10}\,e^2 - 2\,268\,800\,d^6\,e^{10}\,e^2 - \\
& 689\,151\,d^7\,e^{10}\,e^2 - 42\,480\,d^8\,e^{10}\,e^2 + 79\,358\,760\,e^{11}\,e^2 + 181\,806\,640\,d^2\,e^{11}\,e^2 + \\
& 238\,215\,342\,d^2\,e^{11}\,e^2 + 140\,305\,887\,d^3\,e^{11}\,e^2 + 42\,995\,125\,d^4\,e^{11}\,e^2 + \\
& 4\,941\,564\,d^5\,e^{11}\,e^2 - 421\,838\,d^6\,e^{11}\,e^2 - 156\,841\,d^7\,e^{11}\,e^2 - 11\,210\,d^8\,e^{11}\,e^2 + \\
& 20\,337\,633\,e^{12}\,e^2 + 37\,875\,499\,d^2\,e^{12}\,e^2 + 35\,310\,184\,d^2\,e^{12}\,e^2 + 17\,163\,580\,d^3\,e^{12}\,e^2 + \\
& 4\,657\,433\,d^4\,e^{12}\,e^2 + 410\,185\,d^5\,e^{12}\,e^2 - 64\,852\,d^6\,e^{12}\,e^2 - 17\,227\,d^7\,e^{12}\,e^2 - \\
& 1180\,d^8\,e^{12}\,e^2 + 4\,332\,374\,e^{13}\,e^2 + 7\,037\,529\,d^2\,e^{13}\,e^2 + 4\,730\,223\,d^2\,e^{13}\,e^2 + \\
& 1\,571\,858\,d^3\,e^{13}\,e^2 + 228\,117\,d^4\,e^{13}\,e^2 - 21\,692\,d^5\,e^{13}\,e^2 - 8\,259\,d^6\,e^{13}\,e^2 - \\
& 518\,d^7\,e^{13}\,e^2 + 576\,808\,e^{14}\,e^2 + 922\,040\,d^2\,e^{14}\,e^2 + 583\,383\,d^2\,e^{14}\,e^2 + 174\,173\,d^3\,e^{14}\,e^2 + \\
& 17\,658\,d^4\,e^{14}\,e^2 - 2617\,d^5\,e^{14}\,e^2 - 400\,d^6\,e^{14}\,e^2 + 30\,360\,e^{15}\,e^2 + 51\,680\,d^2\,e^{15}\,e^2 + \\
& 34\,130\,d^2\,e^{15}\,e^2 + 10\,095\,d^3\,e^{15}\,e^2 + 945\,d^4\,e^{15}\,e^2 - 70\,d^5\,e^{15}\,e^2 - 412\,722\,864\,e^2 + \\
& 123\,249\,600\,d^2\,e^2 - 8\,785\,584\,d^2\,e^2 - 3\,193\,953\,444\,e^1\,e^2 + 362\,974\,608\,d^2\,e^1\,e^2 + \\
& 129\,544\,596\,d^2\,e^1\,e^2 - 14\,999\,256\,d^3\,e^1\,e^2 - 11\,082\,897\,738\,e^1\,e^2 - 440\,355\,204\,d^2\,e^1\,e^2 + \\
& 1\,409\,779\,944\,d^2\,e^1\,e^2 - 166\,705\,236\,d^3\,e^1\,e^2 + 3\,173\,472\,d^4\,e^1\,e^2 - 22\,502\,444\,436\,e^3\,e^2 - \\
& 3\,175\,160\,004\,d^2\,e^3\,e^2 + 5\,737\,565\,025\,d^2\,e^3\,e^2 - 84\,757\,098\,d^3\,e^3\,e^2 - \\
& 152\,017\,464\,d^4\,e^3\,e^2 + 11\,645\,328\,d^5\,e^3\,e^2 - 29\,122\,036\,605\,e^4\,e^2 - 4\,682\,685\,285\,d^2\,e^4\,e^2 + \\
& 13\,993\,017\,060\,d^2\,e^4\,e^2 + 1\,519\,403\,265\,d^3\,e^4\,e^2 - 515\,540\,064\,d^4\,e^4\,e^2 - \\
& 18\,695\,784\,d^5\,e^4\,e^2 + 5\,347\,536\,d^6\,e^4\,e^2 - 24\,291\,178\,713\,e^5\,e^2 - 639\,947\,649\,d^2\,e^5\,e^2 + \\
& 23\,007\,150\,192\,d^2\,e^5\,e^2 + 5\,012\,633\,502\,d^3\,e^5\,e^2 - 604\,978\,154\,d^4\,e^5\,e^2 - \\
& 136\,057\,620\,d^5\,e^5\,e^2 + 8\,856\,804\,d^6\,e^5\,e^2 + 935\,304\,d^7\,e^5\,e^2 - 12\,139\,457\,193\,e^6\,e^2 + \\
& 6\,406\,695\,085\,d^2\,e^6\,e^2 + 26\,349\,269\,788\,d^2\,e^6\,e^2 + 8\,016\,293\,046\,d^3\,e^6\,e^2 - \\
& 87\,975\,162\,d^4\,e^6\,e^2 - 221\,448\,010\,d^5\,e^6\,e^2 - 1\,015\,576\,d^6\,e^6\,e^2 + 2\,352\,828\,d^7\,e^6\,e^2 + \\
& 56\,640\,d^8\,e^6\,e^2 - 2\,370\,149\,963\,e^7\,e^2 + 9\,372\,684\,057\,d^2\,e^7\,e^2 + 21\,068\,515\,940\,d^2\,e^7\,e^2 + \\
& 7\,814\,370\,907\,d^3\,e^7\,e^2 + 528\,600\,834\,d^4\,e^7\,e^2 - 165\,858\,512\,d^5\,e^7\,e^2 - \\
& 11\,708\,611\,d^6\,e^7\,e^2 + 2\,413\,710\,d^7\,e^7\,e^2 + 151\,040\,d^8\,e^7\,e^2 + 1\,051\,299\,548\,e^8\,e^2 + \\
& 6\,721\,450\,264\,d^2\,e^8\,e^2 + 11\,599\,420\,704\,d^2\,e^8\,e^2 + 4\,931\,946\,196\,d^3\,e^8\,e^2 + \\
& 651\,850\,653\,d^4\,e^8\,e^2 - 50\,395\,731\,d^5\,e^8\,e^2 - 9\,667\,904\,d^6\,e^8\,e^2 + 1\,351\,309\,d^7\,e^8\,e^2 + \\
& 160\,480\,d^8\,e^8\,e^2 + 896\,150\,928\,e^9\,e^2 + 2\,829\,857\,255\,d^2\,e^9\,e^2 + 4\,280\,870\,807\,d^2\,e^9\,e^2 + \\
& 2\,031\,202\,343\,d^3\,e^9\,e^2 + 387\,936\,500\,d^4\,e^9\,e^2 + 10\,114\,987\,d^5\,e^9\,e^2 - 2\,516\,702\,d^6\,e^9\,e^2 + \\
& 502\,730\,d^7\,e^9\,e^2 + 84\,960\,d^8\,e^9\,e^2 + 302\,293\,030\,e^{10}\,e^2 + 736\,640\,746\,d^2\,e^{10}\,e^2 + \\
& 1\,023\,719\,107\,d^2\,e^{10}\,e^2 + 534\,306\,796\,d^3\,e^{10}\,e^2 + 133\,327\,559\,d^4\,e^{10}\,e^2 + \\
& 13\,377\,761\,d^5\,e^{10}\,e^2 + 528\,804\,d^6\,e^{10}\,e^2 + 152\,286\,d^7\,e^{10}\,e^2 + 22\,420\,d^8\,e^{10}\,e^2 + \\
& 72\,143\,105\,e^{11}\,e^2 + 136\,252\,541\,d^2\,e^{11}\,e^2 + 158\,772\,321\,d^2\,e^{11}\,e^2 + 86\,875\,594\,d^3\,e^{11}\,e^2 + \\
& 26\,532\,888\,d^4\,e^{11}\,e^2 + 4\,284\,456\,d^5\,e^{11}\,e^2 + 423\,047\,d^6\,e^{11}\,e^2 + 35\,465\,d^7\,e^{11}\,e^2 + \\
& 2360\,d^8\,e^{11}\,e^2 + 17\,008\,885\,e^{12}\,e^2 + 25\,234\,466\,d^2\,e^{12}\,e^2 + 19\,640\,206\,d^2\,e^{12}\,e^2 + \\
& 9\,201\,488\,d^3\,e^{12}\,e^2 + 2\,906\,217\,d^4\,e^{12}\,e^2 + 566\,276\,d^5\,e^{12}\,e^2 + 70\,578\,d^6\,e^{12}\,e^2 + \\
& 4018\,d^7\,e^{12}\,e^2 + 3\,136\,806\,e^{13}\,e^2 + 4\,466\,176\,d^2\,e^{13}\,e^2 + 2\,741\,463\,d^2\,e^{13}\,e^2 + \\
& 946\,719\,d^3\,e^{13}\,e^2 + 201\,599\,d^4\,e^{13}\,e^2 + 24\,275\,d^5\,e^{13}\,e^2 + 1660\,d^6\,e^{13}\,e^2 + \\
& 298\,712\,e^{14}\,e^2 + 468\,192\,d^2\,e^{14}\,e^2 + 303\,467\,d^2\,e^{14}\,e^2 + 101\,066\,d^3\,e^{14}\,e^2 + \\
& 16\,728\,d^4\,e^{14}\,e^2 + 1010\,d^5\,e^{14}\,e^2 + 10\,080\,e^{15}\,e^2 + 19\,040\,d^2\,e^{15}\,e^2 +
\end{aligned}$$

$$\begin{aligned}
& 13860 d^2 e^{15} e^2 + 4550 d^3 e^{15} e^2 + 560 d^4 e^{15} e^2 - 1144849464 e^3 + 485208576 d^2 e^3 - \\
& 65642940 d^2 e^3 + 2685312 d^3 e^3 - 8101716174 e^1 e^3 + 2123568468 d^2 e^1 e^3 + \\
& 168190416 d^2 e^1 e^3 - 74001528 d^3 e^1 e^3 + 3953664 d^4 e^1 e^3 - 25367896629 e^{1^2} e^3 + \\
& 3886286364 d^2 e^{1^2} e^3 + 2852738037 d^2 e^{1^2} e^3 - 690025740 d^3 e^{1^2} e^3 + \\
& 40845432 d^4 e^{1^2} e^3 - 659424 d^5 e^{1^2} e^3 - 45496626822 e^3 e^3 + 5540735145 d^2 e^1 e^3 e^3 + \\
& 11128954755 d^2 e^1 e^3 e^3 - 1597976790 d^3 e^1 e^3 e^3 - 209276256 d^4 e^1 e^3 e^3 + \\
& 42032160 d^5 e^1 e^3 e^3 - 2042496 d^6 e^1 e^3 e^3 - 50231049501 e^1 e^4 e^3 + 11170622970 d^2 e^1 e^4 e^3 + \\
& 24590006218 d^2 e^1 e^4 e^3 - 941938709 d^3 e^1 e^4 e^3 - 961778338 d^4 e^1 e^4 e^3 + \\
& 66614592 d^5 e^1 e^4 e^3 + 5543268 d^6 e^1 e^4 e^3 - 643296 d^7 e^1 e^4 e^3 - 33413543811 e^{1^5} e^3 + \\
& 21148376595 d^2 e^{1^5} e^3 + 35638124420 d^2 e^{1^5} e^3 + 2205631443 d^3 e^{1^5} e^3 - \\
& 1503271576 d^4 e^{1^5} e^3 - 35871356 d^5 e^{1^5} e^3 + 20078096 d^6 e^{1^5} e^3 - 936264 d^7 e^{1^5} e^3 - \\
& 56640 d^8 e^{1^5} e^3 - 10853237767 e^{1^6} e^3 + 26089127342 d^2 e^{1^6} e^3 + 35244071070 d^2 e^{1^6} e^3 + \\
& 5309307093 d^3 e^{1^6} e^3 - 1126914199 d^4 e^{1^6} e^3 - 160511646 d^5 e^{1^6} e^3 + \\
& 18379341 d^6 e^{1^6} e^3 - 51140 d^7 e^{1^6} e^3 - 151040 d^8 e^{1^6} e^3 + 1086089395 e^{1^7} e^3 + \\
& 20029778950 d^2 e^{1^7} e^3 + 23855046334 d^2 e^{1^7} e^3 + 5452022105 d^3 e^{1^7} e^3 - \\
& 310744390 d^4 e^{1^7} e^3 - 156265469 d^5 e^{1^7} e^3 + 3458859 d^6 e^{1^7} e^3 + 423366 d^7 e^{1^7} e^3 - \\
& 160480 d^8 e^{1^7} e^3 + 2470883453 e^{1^8} e^3 + 9550268886 d^2 e^{1^8} e^3 + 10848472197 d^2 e^{1^8} e^3 + \\
& 3254598558 d^3 e^{1^8} e^3 + 129794755 d^4 e^{1^8} e^3 - 71969042 d^5 e^{1^8} e^3 - \\
& 4662926 d^6 e^{1^8} e^3 + 35447 d^7 e^{1^8} e^3 - 84960 d^8 e^{1^8} e^3 + 971252899 e^{1^9} e^3 + \\
& 2770207966 d^2 e^{1^9} e^3 + 3184987040 d^2 e^{1^9} e^3 + 1176631613 d^3 e^{1^9} e^3 + \\
& 133147188 d^4 e^{1^9} e^3 - 15562794 d^5 e^{1^9} e^3 - 3532924 d^6 e^{1^9} e^3 - 190219 d^7 e^{1^9} e^3 - \\
& 22420 d^8 e^{1^9} e^3 + 203381328 e^{1^{10}} e^3 + 479768387 d^2 e^{1^{10}} e^3 + 563429608 d^2 e^{1^{10}} e^3 + \\
& 244410565 d^3 e^{1^{10}} e^3 + 41524515 d^4 e^{1^{10}} e^3 - 1034435 d^5 e^{1^{10}} e^3 - 1036656 d^6 e^{1^{10}} e^3 - \\
& 94329 d^7 e^{1^{10}} e^3 - 2360 d^8 e^{1^{10}} e^3 + 38885299 e^{1^{11}} e^3 + 59301566 d^2 e^{1^{11}} e^3 + \\
& 55659294 d^2 e^{1^{11}} e^3 + 24570935 d^3 e^{1^{11}} e^3 + 4751976 d^4 e^{1^{11}} e^3 - 29054 d^5 e^{1^{11}} e^3 - \\
& 130974 d^6 e^{1^{11}} e^3 - 13634 d^7 e^{1^{11}} e^3 + 8765501 e^{1^{12}} e^3 + 9485440 d^2 e^{1^{12}} e^3 + \\
& 4296459 d^2 e^{1^{12}} e^3 + 840936 d^3 e^{1^{12}} e^3 - 35046 d^4 e^{1^{12}} e^3 - 41844 d^5 e^{1^{12}} e^3 - \\
& 4376 d^6 e^{1^{12}} e^3 + 1254424 e^{1^{13}} e^3 + 1458845 d^2 e^{1^{13}} e^3 + 612518 d^2 e^{1^{13}} e^3 + \\
& 83017 d^3 e^{1^{13}} e^3 - 11902 d^4 e^{1^{13}} e^3 - 2810 d^5 e^{1^{13}} e^3 + 67520 e^{1^{14}} e^3 + \\
& 90460 d^2 e^{1^{14}} e^3 + 41880 d^2 e^{1^{14}} e^3 + 6405 d^3 e^{1^{14}} e^3 - 140 d^4 e^{1^{14}} e^3 - \\
& 2100745152 e^4 + 1121159016 d^2 e^4 - 214757208 d^2 e^4 + 16605792 d^3 e^4 - \\
& 398736 d^4 e^4 - 13589760366 e^1 e^4 + 5366329956 d^2 e^1 e^4 - 232507908 d^2 e^1 e^4 - \\
& 138893856 d^3 e^1 e^4 + 17459076 d^4 e^1 e^4 - 490440 d^5 e^1 e^4 - 38180767320 e^{1^2} e^4 + \\
& 12730356918 d^2 e^{1^2} e^4 + 2468141142 d^2 e^{1^2} e^4 - 1290054768 d^3 e^{1^2} e^4 + \\
& 135656640 d^4 e^{1^2} e^4 - 4811100 d^5 e^{1^2} e^4 + 92112 d^6 e^{1^2} e^4 - 59584719675 e^{1^3} e^4 + \\
& 23006383233 d^2 e^{1^3} e^4 + 10875298703 d^2 e^{1^3} e^4 - 3562135500 d^3 e^{1^3} e^4 + \\
& 26508365 d^4 e^{1^3} e^4 + 51884226 d^5 e^{1^3} e^4 - 4841172 d^6 e^{1^3} e^4 + 175464 d^7 e^{1^3} e^4 - \\
& 54118574043 e^{1^4} e^4 + 36471358790 d^2 e^{1^4} e^4 + 23337857097 d^2 e^{1^4} e^4 - \\
& 4744620090 d^3 e^{1^4} e^4 - 674408402 d^4 e^{1^4} e^4 + 137562399 d^5 e^{1^4} e^4 - \\
& 4736632 d^6 e^{1^4} e^4 - 248564 d^7 e^{1^4} e^4 + 28320 d^8 e^{1^4} e^4 - 25591758519 e^{1^5} e^4 + \\
& 45645609664 d^2 e^{1^5} e^4 + 31456890457 d^2 e^{1^5} e^4 - 2804899887 d^3 e^{1^5} e^4 - \\
& 1357469961 d^4 e^{1^5} e^4 + 105520098 d^5 e^{1^5} e^4 + 7536587 d^6 e^{1^5} e^4 - 1058570 d^7 e^{1^5} e^4 + \\
& 75520 d^8 e^{1^5} e^4 - 1386397268 e^{1^6} e^4 + 39904259538 d^2 e^{1^6} e^4 + 28208550416 d^2 e^{1^6} e^4 + \\
& 436395134 d^3 e^{1^6} e^4 - 1213491636 d^4 e^{1^6} e^4 - 9912521 d^5 e^{1^6} e^4 + \\
& 13891126 d^6 e^{1^6} e^4 - 751639 d^7 e^{1^6} e^4 + 80240 d^8 e^{1^6} e^4 + 5198353098 e^{1^7} e^4 + \\
& 22899549508 d^2 e^{1^7} e^4 + 16896930914 d^2 e^{1^7} e^4 + 1868018813 d^3 e^{1^7} e^4 - \\
& 542504677 d^4 e^{1^7} e^4 - 58712367 d^5 e^{1^7} e^4 + 8019423 d^6 e^{1^7} e^4 + 152122 d^7 e^{1^7} e^4 + \\
& 42480 d^8 e^{1^7} e^4 + 2786160565 e^{1^8} e^4 + 8245032955 d^2 e^{1^8} e^4 + 6586948619 d^2 e^{1^8} e^4 +
\end{aligned}$$

$$\begin{aligned}
& 1\,317\,318\,936\,d^3\,e^8\,e^4 - 81\,971\,709\,d^4\,e^8\,e^4 - 32\,373\,291\,d^5\,e^8\,e^4 + 2\,011\,999\,d^6\,e^8\,e^4 + \\
& 380\,606\,d^7\,e^8\,e^4 + 11\,210\,d^8\,e^8\,e^4 + 636\,883\,413\,e^9\,e^4 + 1\,747\,413\,368\,d\,e^9\,e^4 + \\
& 1\,575\,993\,758\,d^2\,e^9\,e^4 + 459\,347\,674\,d^3\,e^9\,e^4 + 27\,429\,781\,d^4\,e^9\,e^4 - \\
& 5\,362\,718\,d^5\,e^9\,e^4 + 323\,945\,d^6\,e^9\,e^4 + 155\,701\,d^7\,e^9\,e^4 + 1180\,d^8\,e^9\,e^4 + \\
& 82\,334\,202\,e^{10}\,e^4 + 203\,843\,601\,d\,e^{10}\,e^4 + 208\,425\,680\,d^2\,e^{10}\,e^4 + 82\,424\,183\,d^3\,e^{10}\,e^4 + \\
& 13\,512\,466\,d^4\,e^{10}\,e^4 + 829\,164\,d^5\,e^{10}\,e^4 + 109\,048\,d^6\,e^{10}\,e^4 + 20\,866\,d^7\,e^{10}\,e^4 + \\
& 15\,071\,967\,e^{11}\,e^4 + 18\,355\,269\,d\,e^{11}\,e^4 + 14\,254\,838\,d^2\,e^{11}\,e^4 + 6\,745\,199\,d^3\,e^{11}\,e^4 + \\
& 1\,831\,588\,d^4\,e^{11}\,e^4 + 297\,741\,d^5\,e^{11}\,e^4 + 22\,248\,d^6\,e^{11}\,e^4 + 3\,384\,107\,e^{12}\,e^4 + \\
& 3\,261\,253\,d\,e^{12}\,e^4 + 1\,314\,285\,d^2\,e^{12}\,e^4 + 337\,986\,d^3\,e^{12}\,e^4 + 61\,602\,d^4\,e^{12}\,e^4 + \\
& 7510\,d^5\,e^{12}\,e^4 + 353\,806\,e^{13}\,e^4 + 413\,122\,d\,e^{13}\,e^4 + 186\,843\,d^2\,e^{13}\,e^4 + \\
& 39\,332\,d^3\,e^{13}\,e^4 + 3040\,d^4\,e^{13}\,e^4 + 12\,040\,e^{14}\,e^4 + 17\,850\,d\,e^{14}\,e^4 + 9030\,d^2\,e^{14}\,e^4 + \\
& 1540\,d^3\,e^{14}\,e^4 - 2\,648\,886\,462\,e^5 + 1\,673\,056\,584\,d\,e^5 - 401\,483\,124\,d^2\,e^5 + \\
& 43\,717\,152\,d^3\,e^5 - 1\,957\,812\,d^4\,e^5 + 23\,424\,d^5\,e^5 - 15\,696\,931\,212\,e\,e^5 + \\
& 8\,080\,116\,048\,d\,e\,e^5 - 1\,070\,701\,608\,d^2\,e\,e^5 - 99\,679\,608\,d^3\,e\,e^5 + 30\,257\,760\,d^4\,e\,e^5 - \\
& 1\,768\,632\,d^5\,e\,e^5 + 22\,944\,d^6\,e\,e^5 - 39\,212\,794\,476\,e^2\,e^5 + 19\,804\,767\,780\,d\,e^2\,e^5 - \\
& 474\,337\,263\,d^2\,e^2\,e^5 - 1\,226\,306\,304\,d^3\,e^2\,e^5 + 205\,424\,855\,d^4\,e^2\,e^5 - \\
& 10\,996\,548\,d^5\,e^2\,e^5 + 266\,604\,d^6\,e^2\,e^5 - 5712\,d^7\,e^2\,e^5 - 51\,687\,930\,204\,e^3\,e^5 + \\
& 34\,876\,374\,655\,d\,e^3\,e^5 + 3\,417\,062\,590\,d^2\,e^3\,e^5 - 3\,778\,491\,386\,d^3\,e^3\,e^5 + \\
& 356\,347\,243\,d^4\,e^3\,e^5 + 17\,870\,202\,d^5\,e^3\,e^5 - 3\,591\,824\,d^6\,e^3\,e^5 + 199\,632\,d^7\,e^3\,e^5 - \\
& 5664\,d^8\,e^3\,e^5 - 35\,175\,489\,398\,e^4\,e^5 + 48\,375\,718\,752\,d\,e^4\,e^5 + 10\,133\,461\,643\,d^2\,e^4\,e^5 - \\
& 5\,784\,281\,566\,d^3\,e^4\,e^5 + 41\,909\,977\,d^4\,e^4\,e^5 + 96\,282\,925\,d^5\,e^4\,e^5 - 8\,358\,117\,d^6\,e^4\,e^5 + \\
& 356\,328\,d^7\,e^4\,e^5 - 15\,104\,d^8\,e^4\,e^5 - 6\,293\,796\,748\,e^5\,e^5 + 49\,980\,422\,456\,d\,e^5\,e^5 + \\
& 14\,977\,002\,639\,d^2\,e^5\,e^5 - 4\,811\,960\,342\,d^3\,e^5\,e^5 - 505\,152\,571\,d^4\,e^5\,e^5 + \\
& 115\,163\,105\,d^5\,e^5\,e^5 - 4\,189\,529\,d^6\,e^5\,e^5 - 21\,640\,d^7\,e^5\,e^5 - 16\,048\,d^8\,e^5\,e^5 + \\
& 8\,039\,761\,628\,e^6\,e^5 + 35\,633\,107\,158\,d\,e^6\,e^5 + 13\,598\,392\,328\,d^2\,e^6\,e^5 - \\
& 1\,959\,548\,659\,d^3\,e^6\,e^5 - 618\,561\,935\,d^4\,e^6\,e^5 + 50\,563\,209\,d^5\,e^6\,e^5 + \\
& 2\,455\,415\,d^6\,e^6\,e^5 - 436\,169\,d^7\,e^6\,e^5 - 8496\,d^8\,e^6\,e^5 + 6\,409\,952\,668\,e^7\,e^5 + \\
& 16\,574\,503\,925\,d\,e^7\,e^5 + 7\,794\,708\,129\,d^2\,e^7\,e^5 - 36\,709\,185\,d^3\,e^7\,e^5 - \\
& 322\,019\,479\,d^4\,e^7\,e^5 - 2\,204\,660\,d^5\,e^7\,e^5 + 2\,554\,643\,d^6\,e^7\,e^5 - 367\,287\,d^7\,e^7\,e^5 - \\
& 2242\,d^8\,e^7\,e^5 + 1\,988\,126\,868\,e^8\,e^5 + 4\,732\,495\,629\,d\,e^8\,e^5 + 2\,749\,258\,420\,d^2\,e^8\,e^5 + \\
& 315\,932\,143\,d^3\,e^8\,e^5 - 72\,215\,247\,d^4\,e^8\,e^5 - 9\,538\,885\,d^5\,e^8\,e^5 + 281\,564\,d^6\,e^8\,e^5 - \\
& 124\,277\,d^7\,e^8\,e^5 - 236\,d^8\,e^8\,e^5 + 280\,814\,011\,e^9\,e^5 + 751\,828\,946\,d\,e^9\,e^5 + \\
& 549\,876\,352\,d^2\,e^9\,e^5 + 124\,642\,574\,d^3\,e^9\,e^5 - 1\,608\,400\,d^4\,e^9\,e^5 - 3\,157\,773\,d^5\,e^9\,e^5 - \\
& 255\,918\,d^6\,e^9\,e^5 - 15\,514\,d^7\,e^9\,e^5 + 22\,296\,304\,e^{10}\,e^5 + 56\,626\,836\,d\,e^{10}\,e^5 + \\
& 50\,081\,953\,d^2\,e^{10}\,e^5 + 16\,441\,811\,d^3\,e^{10}\,e^5 + 1\,157\,772\,d^4\,e^{10}\,e^5 - 383\,549\,d^5\,e^{10}\,e^5 - \\
& 61\,868\,d^6\,e^{10}\,e^5 + 4\,529\,898\,e^{11}\,e^5 + 3\,158\,698\,d\,e^{11}\,e^5 + 904\,912\,d^2\,e^{11}\,e^5 + \\
& 48\,989\,d^3\,e^{11}\,e^5 - 70\,573\,d^4\,e^{11}\,e^5 - 13\,558\,d^5\,e^{11}\,e^5 + 885\,497\,e^{12}\,e^5 + \\
& 677\,512\,d\,e^{12}\,e^5 + 122\,358\,d^2\,e^{12}\,e^5 - 26\,058\,d^3\,e^{12}\,e^5 - 8260\,d^4\,e^{12}\,e^5 + \\
& 56\,330\,e^{13}\,e^5 + 53\,475\,d\,e^{13}\,e^5 + 13\,545\,d^2\,e^{13}\,e^5 + 140\,d^3\,e^{13}\,e^5 - 2\,278\,597\,572\,e^6 + \\
& 1\,659\,663\,948\,d\,e^6 - 467\,208\,624\,d^2\,e^6 + 63\,336\,336\,d^3\,e^6 - 3\,927\,744\,d^4\,e^6 + 84\,192\,d^5\,e^6 - \\
& 144\,d^6\,e^6 - 12\,476\,274\,114\,e\,e^6 + 7\,856\,388\,600\,d\,e\,e^6 - 1\,639\,442\,432\,d^2\,e\,e^6 + \\
& 42\,607\,564\,d^3\,e\,e^6 + 24\,210\,756\,d^4\,e\,e^6 - 2\,414\,832\,d^5\,e\,e^6 + 60\,012\,d^6\,e\,e^6 - \\
& 72\,d^7\,e\,e^6 - 27\,243\,529\,668\,e^2\,e^6 + 18\,490\,548\,384\,d\,e^2\,e^6 - 3\,303\,764\,566\,d^2\,e^2\,e^6 - \\
& 463\,098\,356\,d^3\,e^2\,e^6 + 160\,373\,982\,d^4\,e^2\,e^6 - 11\,603\,564\,d^5\,e^2\,e^6 + 267\,480\,d^6\,e^2\,e^6 - \\
& 3164\,d^7\,e^2\,e^6 - 28\,179\,973\,729\,e^3\,e^6 + 30\,083\,340\,206\,d\,e^3\,e^6 - 4\,083\,412\,569\,d^2\,e^3\,e^6 - \\
& 2\,016\,112\,895\,d^3\,e^3\,e^6 + 401\,100\,958\,d^4\,e^3\,e^6 - 14\,732\,644\,d^5\,e^3\,e^6 - \\
& 560\,721\,d^6\,e^3\,e^6 + 31\,522\,d^7\,e^3\,e^6 - 9\,431\,710\,073\,e^4\,e^6 + 37\,191\,623\,420\,d\,e^4\,e^6 - \\
& 2\,173\,030\,250\,d^2\,e^4\,e^6 - 3\,571\,456\,016\,d^3\,e^4\,e^6 + 388\,107\,068\,d^4\,e^4\,e^6 +
\end{aligned}$$

$$\begin{aligned}
& 18\,332\,051\,d^5\,e^4\,e^6 - 3\,424\,824\,d^6\,e^4\,e^6 + 141\,691\,d^7\,e^4\,e^6 + 8\,413\,770\,717\,e^5\,e^6 + \\
& 33\,519\,841\,159\,d^2\,e^5\,e^6 + 1\,473\,150\,969\,d^2\,e^5\,e^6 - 3\,323\,556\,243\,d^3\,e^5\,e^6 + \\
& 66\,044\,008\,d^4\,e^5\,e^6 + 47\,103\,901\,d^5\,e^5\,e^6 - 4\,118\,408\,d^6\,e^5\,e^6 + 203\,078\,d^7\,e^5\,e^6 + \\
& 10\,471\,448\,776\,e^6\,e^6 + 20\,601\,744\,266\,d^2\,e^6\,e^6 + 3\,268\,069\,975\,d^2\,e^6\,e^6 - \\
& 1\,656\,169\,192\,d^3\,e^6\,e^6 - 143\,535\,113\,d^4\,e^6\,e^6 + 31\,226\,409\,d^5\,e^6\,e^6 - 1\,342\,302\,d^6\,e^6\,e^6 + \\
& 134\,402\,d^7\,e^6\,e^6 + 4\,669\,860\,531\,e^7\,e^6 + 8\,122\,881\,354\,d^2\,e^7\,e^6 + 2\,309\,177\,758\,d^2\,e^7\,e^6 - \\
& 354\,030\,082\,d^3\,e^7\,e^6 - 107\,648\,822\,d^4\,e^7\,e^6 + 6\,704\,308\,d^5\,e^7\,e^6 + 554\,385\,d^6\,e^7\,e^6 + \\
& 42\,503\,d^7\,e^7\,e^6 + 981\,899\,102\,e^8\,e^6 + 1\,894\,618\,909\,d^2\,e^8\,e^6 + 815\,690\,958\,d^2\,e^8\,e^6 + \\
& 28\,633\,879\,d^3\,e^8\,e^6 - 26\,511\,367\,d^4\,e^8\,e^6 - 307\,316\,d^5\,e^8\,e^6 + 441\,530\,d^6\,e^8\,e^6 + \\
& 5214\,d^7\,e^8\,e^6 + 87\,800\,511\,e^9\,e^6 + 223\,618\,845\,d^2\,e^9\,e^6 + 138\,978\,980\,d^2\,e^9\,e^6 + \\
& 26\,138\,472\,d^3\,e^9\,e^6 - 156\,251\,d^4\,e^9\,e^6 - 24\,917\,d^5\,e^9\,e^6 + 75\,372\,d^6\,e^9\,e^6 + \\
& 4\,145\,657\,e^{10}\,e^6 + 9\,352\,367\,d^2\,e^{10}\,e^6 + 8\,371\,824\,d^2\,e^{10}\,e^6 + 3\,267\,386\,d^3\,e^{10}\,e^6 + \\
& 654\,354\,d^4\,e^{10}\,e^6 + 61\,746\,d^5\,e^{10}\,e^6 + 1\,226\,221\,e^{11}\,e^6 + 663\,325\,d^2\,e^{11}\,e^6 + \\
& 183\,944\,d^2\,e^{11}\,e^6 + 66\,878\,d^3\,e^{11}\,e^6 + 16\,080\,d^4\,e^{11}\,e^6 + 180\,739\,e^{12}\,e^6 + \\
& 147\,368\,d^2\,e^{12}\,e^6 + 42\,898\,d^2\,e^{12}\,e^6 + 4460\,d^3\,e^{12}\,e^6 + 7280\,e^{13}\,e^6 + \\
& 7490\,d^2\,e^{13}\,e^6 + 1960\,d^2\,e^{13}\,e^6 - 1\,224\,910\,236\,e^7 + 1\,063\,808\,904\,d^2\,e^7 - \\
& 341\,374\,900\,d^2\,e^7 + 54\,047\,328\,d^3\,e^7 - 4\,102\,464\,d^4\,e^7 + 114\,336\,d^5\,e^7 - \\
& 276\,d^6\,e^7 - 6\,413\,400\,546\,e^1\,e^7 + 4\,918\,401\,098\,d^2\,e^1\,e^7 - 1\,396\,449\,636\,d^2\,e^1\,e^7 + \\
& 139\,791\,304\,d^3\,e^1\,e^7 + 5\,491\,862\,d^4\,e^1\,e^7 - 1\,473\,436\,d^5\,e^1\,e^7 + 52\,880\,d^6\,e^1\,e^7 - \\
& 72\,d^7\,e^1\,e^7 - 11\,760\,334\,248\,e^2\,e^7 + 10\,442\,159\,698\,d^2\,e^2\,e^7 - 3\,493\,829\,423\,d^2\,e^2\,e^7 + \\
& 198\,203\,182\,d^3\,e^2\,e^7 + 57\,760\,509\,d^4\,e^2\,e^7 - 6\,307\,700\,d^5\,e^2\,e^7 + 136\,255\,d^6\,e^2\,e^7 + \\
& 2620\,d^7\,e^2\,e^7 - 7\,065\,289\,808\,e^3\,e^7 + 15\,005\,151\,979\,d^2\,e^3\,e^7 - 5\,778\,671\,059\,d^2\,e^3\,e^7 - \\
& 225\,776\,643\,d^3\,e^3\,e^7 + 202\,849\,939\,d^4\,e^3\,e^7 - 15\,757\,271\,d^5\,e^3\,e^7 + 362\,785\,d^6\,e^3\,e^7 - \\
& 978\,d^7\,e^3\,e^7 + 5\,329\,863\,694\,e^4\,e^7 + 16\,759\,354\,355\,d^2\,e^4\,e^7 - 5\,718\,155\,507\,d^2\,e^4\,e^7 - \\
& 1\,029\,381\,736\,d^3\,e^4\,e^7 + 275\,933\,687\,d^4\,e^4\,e^7 - 12\,096\,892\,d^5\,e^4\,e^7 + 59\,024\,d^6\,e^4\,e^7 - \\
& 9823\,d^7\,e^4\,e^7 + 11\,088\,483\,002\,e^5\,e^7 + 13\,930\,932\,742\,d^2\,e^5\,e^7 - 2\,888\,266\,974\,d^2\,e^5\,e^7 - \\
& 1\,249\,475\,247\,d^3\,e^5\,e^7 + 150\,041\,040\,d^4\,e^5\,e^7 + 4\,089\,182\,d^5\,e^5\,e^7 - 659\,522\,d^6\,e^5\,e^7 - \\
& 9925\,d^7\,e^5\,e^7 + 7\,224\,251\,507\,e^6\,e^7 + 7\,888\,350\,173\,d^2\,e^6\,e^7 - 306\,922\,740\,d^2\,e^6\,e^7 - \\
& 712\,891\,641\,d^3\,e^6\,e^7 + 10\,457\,524\,d^4\,e^6\,e^7 + 8\,427\,801\,d^5\,e^6\,e^7 - 713\,944\,d^6\,e^6\,e^7 - \\
& 3879\,d^7\,e^6\,e^7 + 2\,288\,367\,860\,e^7\,e^7 + 2\,785\,148\,940\,d^2\,e^7\,e^7 + 383\,539\,372\,d^2\,e^7\,e^7 - \\
& 181\,309\,388\,d^3\,e^7\,e^7 - 19\,760\,923\,d^4\,e^7\,e^7 + 2\,606\,393\,d^5\,e^7\,e^7 - 283\,414\,d^6\,e^7\,e^7 - \\
& 542\,d^7\,e^7\,e^7 + 346\,911\,826\,e^8\,e^7 + 546\,267\,681\,d^2\,e^8\,e^7 + 179\,602\,966\,d^2\,e^8\,e^7 - \\
& 6\,315\,399\,d^3\,e^8\,e^7 - 6\,582\,150\,d^4\,e^8\,e^7 - 246\,033\,d^5\,e^8\,e^7 - 39\,728\,d^6\,e^8\,e^7 + \\
& 19\,184\,561\,e^9\,e^7 + 45\,698\,824\,d^2\,e^9\,e^7 + 25\,522\,850\,d^2\,e^9\,e^7 + 3\,618\,987\,d^3\,e^9\,e^7 - \\
& 579\,206\,d^4\,e^9\,e^7 - 151\,834\,d^5\,e^9\,e^7 + 457\,962\,e^{10}\,e^7 + 204\,779\,d^2\,e^{10}\,e^7 + \\
& 140\,758\,d^2\,e^{10}\,e^7 - 32\,287\,d^3\,e^{10}\,e^7 - 20\,700\,d^4\,e^{10}\,e^7 + 239\,167\,e^{11}\,e^7 + \\
& 66\,297\,d^2\,e^{11}\,e^7 - 32\,932\,d^2\,e^{11}\,e^7 - 12\,940\,d^3\,e^{11}\,e^7 + 21\,690\,e^{12}\,e^7 + \\
& 11\,655\,d^2\,e^{12}\,e^7 + 560\,d^2\,e^{12}\,e^7 - 235\,793\,970\,e^8 + 371\,650\,222\,d^2\,e^8 - 143\,622\,308\,d^2\,e^8 + \\
& 26\,225\,756\,d^3\,e^8 - 2\,329\,840\,d^4\,e^8 + 72\,232\,d^5\,e^8 - 120\,d^6\,e^8 - 1\,567\,306\,334\,e^1\,e^8 + \\
& 1\,755\,251\,334\,d^2\,e^1\,e^8 - 682\,438\,114\,d^2\,e^1\,e^8 + 116\,049\,372\,d^3\,e^1\,e^8 - 5\,177\,866\,d^4\,e^1\,e^8 - \\
& 293\,840\,d^5\,e^1\,e^8 + 17\,188\,d^6\,e^1\,e^8 - 2\,004\,978\,970\,e^2\,e^8 + 2\,799\,561\,546\,d^2\,e^2\,e^8 - \\
& 1\,815\,108\,030\,d^2\,e^2\,e^8 + 313\,706\,680\,d^3\,e^2\,e^8 - 2\,082\,314\,d^4\,e^2\,e^8 - 1\,673\,582\,d^5\,e^2\,e^8 + \\
& 55\,150\,d^6\,e^2\,e^8 + 1\,940\,410\,803\,e^3\,e^8 + 2\,872\,640\,305\,d^2\,e^3\,e^8 - 3\,345\,047\,142\,d^2\,e^3\,e^8 + \\
& 398\,309\,651\,d^3\,e^3\,e^8 + 37\,000\,702\,d^4\,e^3\,e^8 - 5\,208\,314\,d^5\,e^3\,e^8 + 140\,643\,d^6\,e^3\,e^8 + \\
& 6\,910\,993\,415\,e^4\,e^8 + 3\,038\,104\,617\,d^2\,e^4\,e^8 - 3\,619\,956\,843\,d^2\,e^4\,e^8 + 91\,234\,602\,d^3\,e^4\,e^8 + \\
& 86\,253\,762\,d^4\,e^4\,e^8 - 7\,160\,176\,d^5\,e^4\,e^8 + 203\,248\,d^6\,e^4\,e^8 + 6\,795\,072\,399\,e^5\,e^8 + \\
& 2\,982\,595\,778\,d^2\,e^5\,e^8 - 2\,123\,897\,730\,d^2\,e^5\,e^8 - 212\,108\,330\,d^3\,e^5\,e^8 + \\
& 67\,497\,961\,d^4\,e^5\,e^8 - 3\,501\,729\,d^5\,e^5\,e^8 + 145\,259\,d^6\,e^5\,e^8 + 3\,235\,533\,145\,e^6\,e^8 +
\end{aligned}$$

$$\begin{aligned}
& 1917464915 d^2 e^6 e^8 - 562769640 d^2 e^6 e^8 - 184838711 d^3 e^6 e^8 + \\
& 17133351 d^4 e^6 e^8 + 337492 d^5 e^6 e^8 + 49146 d^6 e^6 e^8 + 790558372 e^7 e^8 + \\
& 685264759 d^2 e^7 e^8 + 6002977 d^2 e^7 e^8 - 53041614 d^3 e^7 e^8 - 1562015 d^4 e^7 e^8 + \\
& 720084 d^5 e^7 e^8 + 6328 d^6 e^7 e^8 + 88252415 e^8 e^8 + 116333753 d^2 e^8 e^8 + \\
& 30540269 d^2 e^8 e^8 - 2477624 d^3 e^8 e^8 - 669074 d^4 e^8 e^8 + 146276 d^5 e^8 e^8 + \\
& 2163785 e^9 e^8 + 5559764 d^2 e^9 e^8 + 3393965 d^2 e^9 e^8 + 844681 d^3 e^9 e^8 + \\
& 99540 d^4 e^9 e^8 + 71076 e^{10} e^8 - 31834 d^2 e^{10} e^8 + 24782 d^2 e^{10} e^8 + \\
& 18570 d^3 e^{10} e^8 + 42371 e^{11} e^8 + 22077 d^2 e^{11} e^8 + 3440 d^2 e^{11} e^8 + 2240 e^{12} e^8 + \\
& 1190 d^2 e^{12} e^8 + 213616968 e^9 - 8555114 d^2 e^9 - 19634652 d^2 e^9 + 5404984 d^3 e^9 - \\
& 655246 d^4 e^9 + 21240 d^5 e^9 + 12 d^6 e^9 + 411272812 e^1 e^9 + 112771036 d^2 e^1 e^9 - \\
& 141493118 d^2 e^1 e^9 + 45270186 d^3 e^1 e^9 - 4287652 d^4 e^1 e^9 + 76968 d^5 e^1 e^9 + \\
& 1376 d^6 e^1 e^9 + 820798223 e^2 e^9 - 503548190 d^2 e^2 e^9 - 369172071 d^2 e^2 e^9 + \\
& 150922308 d^3 e^2 e^9 - 10166861 d^4 e^2 e^9 - 52514 d^5 e^2 e^9 + 12039 d^6 e^2 e^9 + \\
& 2252837221 e^3 e^9 - 1466936279 d^2 e^3 e^9 - 913566433 d^2 e^3 e^9 + 272058634 d^3 e^3 e^9 - \\
& 9696640 d^4 e^3 e^9 - 457432 d^5 e^3 e^9 + 20697 d^6 e^3 e^9 + 3385829685 e^4 e^9 - \\
& 1239926680 d^2 e^4 e^9 - 1197877340 d^2 e^4 e^9 + 197951905 d^3 e^4 e^9 + \\
& 6138138 d^4 e^4 e^9 - 1027732 d^5 e^4 e^9 + 14928 d^6 e^4 e^9 + 2532817956 e^5 e^9 - \\
& 205031637 d^2 e^5 e^9 - 781216093 d^2 e^5 e^9 + 27110078 d^3 e^5 e^9 + 13742333 d^4 e^5 e^9 - \\
& 940639 d^5 e^5 e^9 + 4997 d^6 e^5 e^9 + 992722818 e^6 e^9 + 234857072 d^2 e^6 e^9 - \\
& 230917196 d^2 e^6 e^9 - 27730456 d^3 e^6 e^9 + 5720848 d^4 e^6 e^9 - 358178 d^5 e^6 e^9 + \\
& 644 d^6 e^6 e^9 + 198306126 e^7 e^9 + 125983724 d^2 e^7 e^9 - 13154823 d^2 e^7 e^9 - \\
& 9891826 d^3 e^7 e^9 + 88351 d^4 e^7 e^9 - 46484 d^5 e^7 e^9 + 15556623 e^8 e^9 + \\
& 18683201 d^2 e^8 e^9 + 4627144 d^2 e^8 e^9 - 488629 d^3 e^8 e^9 - 225320 d^4 e^8 e^9 - \\
& 87314 e^9 e^9 + 102825 d^2 e^9 e^9 + 32022 d^2 e^9 e^9 - 16610 d^3 e^9 e^9 + 9298 e^{10} e^9 - \\
& 22213 d^2 e^{10} e^9 - 11360 d^2 e^{10} e^9 + 3570 e^{11} e^9 + 490 d^2 e^{11} e^9 + 220395800 e^{20} - \\
& 81011786 d^2 e^{20} + 11474018 d^2 e^{20} - 950654 d^3 e^{20} - 44472 d^4 e^{20} + 2712 d^5 e^{20} + \\
& 529213030 e^1 e^{20} - 204316256 d^2 e^1 e^{20} + 34967616 d^2 e^1 e^{20} + 4870010 d^3 e^1 e^{20} - \\
& 1145392 d^4 e^1 e^{20} + 37160 d^5 e^1 e^{20} + 506580732 e^2 e^{20} - 709797624 d^2 e^2 e^{20} + \\
& 115557478 d^2 e^2 e^{20} + 29246484 d^3 e^2 e^{20} - 3744382 d^4 e^2 e^{20} + 88870 d^5 e^2 e^{20} + \\
& 589453032 e^3 e^{20} - 1313119141 d^2 e^3 e^{20} + 33926285 d^2 e^3 e^{20} + 76608600 d^3 e^3 e^{20} - \\
& 6105520 d^4 e^3 e^{20} + 112756 d^5 e^3 e^{20} + 775397460 e^4 e^{20} - 1096177445 d^2 e^4 e^{20} - \\
& 168660570 d^2 e^4 e^{20} + 76686447 d^3 e^4 e^{20} - 3639264 d^4 e^4 e^{20} + \\
& 52416 d^5 e^4 e^{20} + 567186775 e^5 e^{20} - 384224285 d^2 e^5 e^{20} - 173161781 d^2 e^5 e^{20} + \\
& 25304403 d^3 e^5 e^{20} + 303876 d^4 e^5 e^{20} - 3422 d^5 e^5 e^{20} + 214174061 e^6 e^{20} - \\
& 13523323 d^2 e^6 e^{20} - 56636125 d^2 e^6 e^{20} - 1704380 d^3 e^6 e^{20} + 840698 d^4 e^6 e^{20} - \\
& 5156 d^5 e^6 e^{20} + 37350372 e^7 e^{20} + 19138976 d^2 e^7 e^{20} - 3355383 d^2 e^7 e^{20} - \\
& 1362099 d^3 e^7 e^{20} + 166120 d^4 e^7 e^{20} + 1536105 e^8 e^{20} + 1914688 d^2 e^8 e^{20} + \\
& 653562 d^2 e^8 e^{20} + 98246 d^3 e^8 e^{20} - 40959 e^9 e^{20} - 6441 d^2 e^9 e^{20} + \\
& 11740 d^2 e^9 e^{20} + 4310 e^{10} e^{20} + 1330 d^2 e^{10} e^{20} + 280 e^{11} e^{20} + 98277928 e^{21} - \\
& 42938790 d^2 e^{21} + 6205880 d^2 e^{21} - 781194 d^3 e^{21} + 18236 d^4 e^{21} + 136 d^5 e^{21} + \\
& 214149656 e^1 e^{21} - 89673894 d^2 e^1 e^{21} + 29675672 d^2 e^1 e^{21} - 2665606 d^3 e^1 e^{21} - \\
& 46402 d^4 e^1 e^{21} + 3148 d^5 e^1 e^{21} - 6365735 e^2 e^{21} - 216149806 d^2 e^2 e^{21} + \\
& 99480656 d^2 e^2 e^{21} - 2701788 d^3 e^2 e^{21} - 460513 d^4 e^2 e^{21} + 16810 d^5 e^2 e^{21} - \\
& 161681450 e^3 e^{21} - 440836758 d^2 e^3 e^{21} + 121030146 d^2 e^3 e^{21} + 6245289 d^3 e^3 e^{21} - \\
& 1018175 d^4 e^3 e^{21} + 26301 d^5 e^3 e^{21} - 42616305 e^4 e^{21} - 388888601 d^2 e^4 e^{21} + \\
& 30052773 d^2 e^4 e^{21} + 13461545 d^3 e^4 e^{21} - 921612 d^4 e^4 e^{21} + 15933 d^5 e^4 e^{21} + \\
& 54466581 e^5 e^{21} - 142699165 d^2 e^5 e^{21} - 22004082 d^2 e^5 e^{21} + 6684134 d^3 e^5 e^{21} - \\
& 297072 d^4 e^5 e^{21} + 3300 d^5 e^5 e^{21} + 34449276 e^6 e^{21} - 11222967 d^2 e^6 e^{21} -
\end{aligned}$$

$$\begin{aligned}
& 9\,539\,784\,d^2e^6e^{11} + 367\,764\,d^3e^6e^{11} - 14\,080\,d^4e^6e^{11} + 5\,260\,371\,e^7e^{11} + \\
& 2\,784\,573\,d^2e^7e^{11} - 223\,298\,d^2e^7e^{11} - 209\,190\,d^3e^7e^{11} + 24\,410\,e^8e^{11} + \\
& 38\,279\,d^2e^8e^{11} - 6448\,d^2e^8e^{11} - 6054\,e^9e^{11} - 5290\,d^2e^9e^{11} + 140\,e^{10}e^{11} + \\
& 20\,612\,180\,e^{12} - 12\,096\,046\,d^2e^{12} + 896\,046\,d^2e^{12} - 150\,672\,d^3e^{12} + 3656\,d^4e^{12} + \\
& 43\,691\,716\,e^1e^{12} - 8\,107\,028\,d^2e^1e^{12} + 5\,980\,466\,d^2e^1e^{12} - 1\,024\,840\,d^3e^1e^{12} + \\
& 25\,010\,d^4e^1e^{12} - 94\,580\,062\,e^2e^{12} + 12\,219\,450\,d^2e^2e^{12} + 27\,150\,306\,d^2e^2e^{12} - \\
& 2\,491\,100\,d^3e^2e^{12} + 36\,634\,d^4e^2e^{12} - 176\,695\,759\,e^3e^{12} - 50\,470\,700\,d^2e^3e^{12} + \\
& 44\,015\,419\,d^2e^3e^{12} - 2\,000\,997\,d^3e^3e^{12} - 6097\,d^4e^3e^{12} - 93\,323\,840\,e^4e^{12} - \\
& 79\,009\,718\,d^2e^4e^{12} + 20\,638\,510\,d^2e^4e^{12} + 482\,924\,d^3e^4e^{12} - 48\,278\,d^4e^4e^{12} - \\
& 7\,890\,913\,e^5e^{12} - 31\,902\,664\,d^2e^5e^{12} - 717\,032\,d^2e^5e^{12} + 796\,227\,d^3e^5e^{12} - \\
& 21\,020\,d^4e^5e^{12} + 4\,871\,974\,e^6e^{12} - 1\,909\,282\,d^2e^6e^{12} - 1\,274\,754\,d^2e^6e^{12} + \\
& 111\,010\,d^3e^6e^{12} + 450\,473\,e^7e^{12} + 282\,959\,d^2e^7e^{12} + 59\,008\,d^2e^7e^{12} - \\
& 4938\,e^8e^{12} + 3730\,d^2e^8e^{12} + 200\,e^9e^{12} - 1\,881\,158\,e^{13} - 2\,361\,130\,d^2e^{13} - \\
& 115\,988\,d^2e^{13} - 6236\,d^3e^{13} + 150\,d^4e^{13} + 4\,795\,958\,e^1e^{13} + 4\,386\,350\,d^2e^1e^{13} - \\
& 467\,310\,d^2e^1e^{13} - 101\,810\,d^3e^1e^{13} + 2352\,d^4e^1e^{13} - 34\,298\,364\,e^2e^{13} + \\
& 30\,187\,590\,d^2e^2e^{13} + 2\,121\,758\,d^2e^2e^{13} - 418\,432\,d^3e^2e^{13} + 10\,610\,d^4e^2e^{13} - \\
& 64\,011\,254\,e^3e^{13} + 17\,050\,610\,d^2e^3e^{13} + 7\,308\,215\,d^2e^3e^{13} - 559\,210\,d^3e^3e^{13} + \\
& 12\,657\,d^4e^3e^{13} - 34\,180\,034\,e^4e^{13} - 8\,476\,445\,d^2e^4e^{13} + 4\,755\,710\,d^2e^4e^{13} - \\
& 185\,233\,d^3e^4e^{13} + 4180\,d^4e^4e^{13} - 3\,387\,740\,e^5e^{13} - 5\,065\,874\,d^2e^5e^{13} + \\
& 284\,597\,d^2e^5e^{13} + 24\,790\,d^3e^5e^{13} + 654\,442\,e^6e^{13} - 45\,043\,d^2e^6e^{13} - \\
& 119\,244\,d^2e^6e^{13} + 10\,958\,e^7e^{13} - 706\,d^2e^7e^{13} - 1020\,e^8e^{13} - 3\,001\,468\,e^{14} - \\
& 503\,730\,d^2e^{14} - 44\,354\,d^2e^{14} + 802\,d^3e^{14} + 1\,172\,848\,e^1e^{14} + 1\,062\,144\,d^2e^1e^{14} - \\
& 367\,880\,d^2e^1e^{14} + 4622\,d^3e^1e^{14} + 193\,274\,e^2e^{14} + 10\,242\,172\,d^2e^2e^{14} - \\
& 607\,628\,d^2e^2e^{14} - 5512\,d^3e^2e^{14} - 12\,381\,179\,e^3e^{14} + 9\,062\,043\,d^2e^3e^{14} + \\
& 301\,747\,d^2e^3e^{14} - 34\,977\,d^3e^3e^{14} - 7\,446\,542\,e^4e^{14} - 86\,768\,d^2e^4e^{14} + \\
& 564\,344\,d^2e^4e^{14} - 22\,370\,d^3e^4e^{14} - 412\,177\,e^5e^{14} - 590\,953\,d^2e^5e^{14} + \\
& 40\,596\,d^2e^5e^{14} + 52\,930\,e^6e^{14} + 19\,958\,d^2e^6e^{14} + 440\,e^7e^{14} - 1\,196\,996\,e^{15} - \\
& 122\,570\,d^2e^{15} - 1968\,d^2e^{15} + 14\,d^3e^{15} + 408\,488\,e^1e^{15} - 149\,824\,d^2e^1e^{15} - \\
& 45\,256\,d^2e^1e^{15} + 678\,d^3e^1e^{15} + 4\,332\,412\,e^2e^{15} + 1\,529\,376\,d^2e^2e^{15} - \\
& 155\,710\,d^2e^2e^{15} + 3446\,d^3e^2e^{15} - 1\,137\,008\,e^3e^{15} + 1\,991\,522\,d^2e^3e^{15} - \\
& 85\,894\,d^2e^3e^{15} + 2354\,d^3e^3e^{15} - 1\,113\,724\,e^4e^{15} + 84\,586\,d^2e^4e^{15} + \\
& 30\,216\,d^2e^4e^{15} - 970\,e^5e^{15} - 38\,238\,d^2e^5e^{15} + 132\,e^6e^{15} - 304\,354\,e^{16} - \\
& 19\,088\,d^2e^{16} + 334\,d^2e^{16} - 46\,940\,e^1e^{16} - 83\,862\,d^2e^1e^{16} - 312\,d^2e^1e^{16} + \\
& 1\,773\,576\,e^2e^{16} + 24\,514\,d^2e^2e^{16} - 7990\,d^2e^2e^{16} + 428\,e^3e^{16} + 241\,012\,d^2e^3e^{16} - \\
& 11\,016\,d^2e^3e^{16} - 109\,966\,e^4e^{16} + 6312\,d^2e^4e^{16} + 2936\,e^5e^{16} - 53\,048\,e^{17} - \\
& 1100\,d^2e^{17} + 12\,d^2e^{17} - 70\,782\,e^1e^{17} - 9378\,d^2e^1e^{17} + 88\,d^2e^1e^{17} + 376\,188\,e^2e^{17} - \\
& 23\,392\,d^2e^2e^{17} + 548\,d^2e^2e^{17} + 6168\,e^3e^{17} + 13\,512\,d^2e^3e^{17} - 5284\,e^4e^{17} - \\
& 5752\,e^{18} + 24\,d^2e^{18} - 19\,432\,e^1e^{18} - 16\,d^2e^1e^{18} + 44\,032\,e^2e^{18} - 2312\,d^2e^2e^{18} + \\
& 16\,e^3e^{18} - 288\,e^{19} - 2280\,e^1e^{19} + 24\,d^2e^1e^{19} + 2256\,e^2e^{19} - 96\,e^1e^{20}) /
\end{aligned}$$

$$(3(2 + e^2)(7 + 7e^1 + d^2e^1 + e^1e^2 + 9e^2 - d^2e^2 + e^1e^2 + 2e^2e^2))$$

$$\begin{aligned}
& (6 + 9e^1 + 2d^2e^1 + 4e^1e^2 + d^2e^1e^2 + 6e^2 - 2d^2e^2 + 3e^1e^2 - d^2e^1e^2 - e^2e^2 + e^1e^2e^2 - e^2e^3)^2 (18 + \\
& 21e^1 + 2d^2e^1 + 4e^1e^2 + d^2e^1e^2 + 30e^2 - 2d^2e^2 + 15e^1e^2 - d^2e^1e^2 + 14e^2e^2 + 4e^1e^2e^2 + 2e^2e^3) \\
& (123 + 234e^1 + 34d^2e^1 + 137e^1e^2 + 30d^2e^1e^2 + 3d^2e^2e^1e^2 + 26e^1e^3 + 2d^2e^1e^3 + 3e^1e^4 + 330e^2 - \\
& 34d^2e^2 + 348e^1e^2 + 16d^2e^1e^2 - 6d^2e^2e^1e^2 + 68e^1e^2e^2 + 6e^1e^3e^2 + 307e^2e^2 - 46d^2e^2e^2 + \\
& 3d^2e^2e^2 + 126e^1e^2e^2 + 10d^2e^1e^2e^2 + 11e^1e^2e^2e^2 + 116e^2e^3 - 12d^2e^2e^3 + 12e^1e^2e^3 + 16e^2e^4) \\
& (173 + 310e^1 + 46d^2e^1 + 159e^1e^2 + 34d^2e^1e^2 + 5d^2e^2e^1e^2 + 22e^1e^3 - 2d^2e^1e^3 + 5e^1e^4 + 486e^2 -
\end{aligned}$$

$$46 d_2 e_2 + 484 e_1 e_2 + 32 d_2 e_1 e_2 - 10 d_2^2 e_1 e_2 + 76 e_1^2 e_2 + 10 e_1^3 e_2 + 485 e_2^2 - 66 d_2 e_2^2 + 5 d_2^2 e_2^2 + 194 e_1 e_2^2 + 22 d_2 e_1 e_2^2 + 13 e_1^2 e_2^2 + 204 e_2^3 - 20 d_2 e_2^3 + 20 e_1 e_2^3 + 32 e_2^4)$$

```
In[ ]:= Variables[g2]
```

```
Out[ ]:= {e2, e1, d2}
```

## Finding possible values of e1 such that g1 = 0

```
In[ ]:= ClearAll[d2, e1, e2]; e1 =  $\frac{1}{10}$ ;
```

```
Reduce[ g1 == 0 && g2 < 0 && a11 > 0 && det > 0 && beta > 0 && y0 > 0 && c1 > 0 && d1 > 0 && d2 > 0 && e1 > 0 && e2 > 0, {d2, e2} ] // FullSimplify
Reduce[ g1 == 0 && g2 > 0 && a11 > 0 && det > 0 && beta > 0 && y0 > 0 && c1 > 0 && d1 > 0 && d2 > 0 && e1 > 0 && e2 > 0, {d2, e2} ] // FullSimplify
```

```
Out[ ]:= (8.81... < d2 ≤ 49.3... && e2 == Root[-238783 - 17643 d2 - 336 d2^2 + (-460240 + 55545 d2 + 3360 d2^2) #1 + (-214030 + 73980 d2) #1^2 + (41950 + 8700 d2) #1^3 + 33400 #1^4 + 1000 #1^5 &, 3] || (d2 + -49.3... > 0 && e2 == Root[-238783 - 17643 d2 - 336 d2^2 + (-460240 + 55545 d2 + 3360 d2^2) #1 + (-214030 + 73980 d2) #1^2 + (41950 + 8700 d2) #1^3 + 33400 #1^4 + 1000 #1^5 &, 1])
```

```
Out[ ]:= False
```

```
In[ ]:= ClearAll[d2, e1, e2]; e1 =  $\frac{2}{10}$ ;
```

```
Reduce[ g1 == 0 && g2 < 0 && a11 > 0 && det > 0 && beta > 0 && y0 > 0 && c1 > 0 && d1 > 0 && d2 > 0 && e1 > 0 && e2 > 0, {d2, e2} ] // FullSimplify
Reduce[ g1 == 0 && g2 > 0 && a11 > 0 && det > 0 && beta > 0 && y0 > 0 && c1 > 0 && d1 > 0 && d2 > 0 && e1 > 0 && e2 > 0, {d2, e2} ] // FullSimplify
```

```
Out[ ]:= (10.4... < d2 ≤ 18.7... && e2 == Root[-38911 - 5146 d2 - 187 d2^2 + (-69665 + 6270 d2 + 935 d2^2) #1 + (-31405 + 10355 d2) #1^2 + (4850 + 1600 d2) #1^3 + 4575 #1^4 + 250 #1^5 &, 3] || (d2 > 18.7... && e2 == Root[-38911 - 5146 d2 - 187 d2^2 + (-69665 + 6270 d2 + 935 d2^2) #1 + (-31405 + 10355 d2) #1^2 + (4850 + 1600 d2) #1^3 + 4575 #1^4 + 250 #1^5 &, 1])
```

```
Out[ ]:= False
```



```

In[ ]:= ClearAll[d2, e1, e2]; e1 =  $\frac{3}{10}$ ;
Reduce[ g1 == 0 && g2 < 0 && a11 > 0 && det > 0 && beta > 0 && y0 > 0 &&
c1 > 0 && d1 > 0 && d2 > 0 && e1 > 0 && e2 > 0, {d2, e2} ] // FullSimplify
Reduce[ g1 == 0 && g2 > 0 && a11 > 0 && det > 0 && beta > 0 && y0 > 0 &&
c1 > 0 && d1 > 0 && d2 > 0 && e1 > 0 && e2 > 0, {d2, e2} ] // FullSimplify
Out[ ]:= d2 >  $12.5\dots$  &&
e2 == Root[ -399 303 - 71 523 d2 - 3726 d22 + (-666 780 + 43 815 d2 + 12 420 d22) #1 +
(-291 810 + 91 460 d2) #12 + (35 550 + 17 300 d2) #13 + 39 600 #14 + 3000 #15 &, 1 ]

Out[ ]:= False

In[ ]:= ClearAll[d2, e1, e2]; e1 =  $\frac{4}{10}$ ;
Reduce[ g1 == 0 && g2 < 0 && a11 > 0 && det > 0 && beta > 0 && y0 > 0 &&
c1 > 0 && d1 > 0 && d2 > 0 && e1 > 0 && e2 > 0, {d2, e2} ] // FullSimplify
Reduce[ g1 == 0 && g2 > 0 && a11 > 0 && det > 0 && beta > 0 && y0 > 0 &&
c1 > 0 && d1 > 0 && d2 > 0 && e1 > 0 && e2 > 0, {d2, e2} ] // FullSimplify
Out[ ]:= 165 d2 >  $2.51\dots \times 10^3$  &&
e2 == Root[ -63 086 - 13 716 d2 - 912 d22 + (-98 645 + 4560 d2 + 2280 d22) #1 +
(-41 990 + 12 465 d2) #12 + (4025 + 2775 d2) #13 + 5300 #14 + 500 #15 &, 1 ]

Out[ ]:= False

In[ ]:= ClearAll[d2, e1, e2]; e1 =  $\frac{5}{10}$ ;
Reduce[ g1 == 0 && g2 < 0 && a11 > 0 && det > 0 && beta > 0 && y0 > 0 &&
c1 > 0 && d1 > 0 && d2 > 0 && e1 > 0 && e2 > 0, {d2, e2} ] // FullSimplify
Reduce[ g1 == 0 && g2 > 0 && a11 > 0 && det > 0 && beta > 0 && y0 > 0 &&
c1 > 0 && d1 > 0 && d2 > 0 && e1 > 0 && e2 > 0, {d2, e2} ] // FullSimplify
Out[ ]:= d2 >  $19.1\dots$  &&
e2 == Root[ -1007 - 251 d2 - 20 d22 + (-1480 + 45 d2 + 40 d22) #1 + (-614 + 172 d2) #12 +
(46 + 44 d2) #13 + 72 #14 + 8 #15 &, 1 ]

Out[ ]:= False

In[ ]:= ClearAll[d2, e1, e2]; e1 =  $\frac{6}{10}$ ;
Reduce[ g1 == 0 && g2 < 0 && a11 > 0 && det > 0 && beta > 0 && y0 > 0 &&
c1 > 0 && d1 > 0 && d2 > 0 && e1 > 0 && e2 > 0, {d2, e2} ] // FullSimplify
Reduce[ g1 == 0 && g2 > 0 && a11 > 0 && det > 0 && beta > 0 && y0 > 0 &&
c1 > 0 && d1 > 0 && d2 > 0 && e1 > 0 && e2 > 0, {d2, e2} ] // FullSimplify
Out[ ]:= d2 >  $24.9\dots$  && e2 == Root[ -96 921 - 26 766 d2 - 2457 d22 + (-134 355 + 2340 d2 + 4095 d22) #1 +
(-54 435 + 14 335 d2) #12 + (3150 + 4150 d2) #13 + 5925 #14 + 750 #15 &, 1 ]

Out[ ]:= False

```

```

In[ ]:= ClearAll[d2, e1, e2]; e1 =  $\frac{7}{10}$ ;
Reduce[ g1 == 0 && g2 < 0 && a11 > 0 && det > 0 && beta > 0 && y0 > 0 &&
c1 > 0 && d1 > 0 && d2 > 0 && e1 > 0 && e2 > 0, {d2, e2} ] // FullSimplify
Reduce[ g1 == 0 && g2 > 0 && a11 > 0 && det > 0 && beta > 0 && y0 > 0 &&
c1 > 0 && d1 > 0 && d2 > 0 && e1 > 0 && e2 > 0, {d2, e2} ] // FullSimplify
Out[ ]:= d2 >  $\sqrt{34.8\dots}$  &&
e2 == Root[-944 743 - 282 723 d2 - 29 106 d22 + (-1 239 220 + 8235 d2 + 41 580 d22) #1 +
(-491 290 + 121 140 d2) #12 + (21 550 + 39 300 d2) #13 + 49 600 #14 + 7000 #15 &, 1]

Out[ ]:= False

In[ ]:= ClearAll[d2, e1, e2]; e1 =  $\frac{8}{10}$ ;
Reduce[ g1 == 0 && g2 < 0 && a11 > 0 && det > 0 && beta > 0 && y0 > 0 &&
c1 > 0 && d1 > 0 && d2 > 0 && e1 > 0 && e2 > 0, {d2, e2} ] // FullSimplify
Reduce[ g1 == 0 && g2 > 0 && a11 > 0 && det > 0 && beta > 0 && y0 > 0 &&
c1 > 0 && d1 > 0 && d2 > 0 && e1 > 0 && e2 > 0, {d2, e2} ] // FullSimplify
Out[ ]:= d2 +  $\sqrt{-54.6\dots}$  > 0 &&
e2 == Root[-142 456 - 45 496 d2 - 5152 d22 + (-177 335 - 420 d2 + 6440 d22) #1 +
(-68 920 + 15 845 d2) #12 + (2225 + 5725 d2) #13 + 6450 #14 + 1000 #15 &, 1]

Out[ ]:= False

In[ ]:= ClearAll[d2, e1, e2]; e1 =  $\frac{9}{10}$ ;
Reduce[ g1 == 0 && g2 < 0 && a11 > 0 && det > 0 && beta > 0 && y0 > 0 &&
c1 > 0 && d1 > 0 && d2 > 0 && e1 > 0 && e2 > 0, {d2, e2} ] // FullSimplify
Reduce[ g1 == 0 && g2 > 0 && a11 > 0 && det > 0 && beta > 0 && y0 > 0 &&
c1 > 0 && d1 > 0 && d2 > 0 && e1 > 0 && e2 > 0, {d2, e2} ] // FullSimplify
Out[ ]:= d2 +  $\sqrt{-114\dots}$  > 0 &&
e2 == Root[-1 362 303 - 459 243 d2 - 56 376 d22 + (-1 613 760 - 16 095 d2 + 62 640 d22) #1 +
(-615 870 + 131 420 d2) #12 + (13 950 + 52 700 d2) #13 + 53 400 #14 + 9000 #15 &, 1]

Out[ ]:= False

In[ ]:= ClearAll[d2, e1, e2]; e1 = 1;
Reduce[ g1 == 0 && g2 < 0 && a11 > 0 && det > 0 && beta > 0 && y0 > 0 &&
c1 > 0 && d1 > 0 && d2 > 0 && e1 > 0 && e2 > 0, {d2, e2} ] // FullSimplify
Reduce[ g1 == 0 && g2 > 0 && a11 > 0 && det > 0 && beta > 0 && y0 > 0 &&
c1 > 0 && d1 > 0 && d2 > 0 && e1 > 0 && e2 > 0, {d2, e2} ] // FullSimplify
Out[ ]:= False

Out[ ]:= False

```

## Setting the value of e1, d2: Equations (16)-(18)

```
In[ ]:= ClearAll[d2, e1, e2]; e1 =  $\frac{5}{10}$ ; d2 = 20;
Reduce[ g1 == 0 && g2 < 0 && a11 > 0 && det > 0 &&
beta > 0 && y0 > 0 && c1 > 0 && d1 > 0 && e2 > 0, {e2} ] // FullSimplify
Reduce[ g1 == 0 && g2 > 0 && a11 > 0 && det > 0 && beta > 0 && y0 > 0 && c1 > 0 && d1 > 0 && e2 > 0,
{e2} ] // FullSimplify
```

```
Out[ ]:= e2 == 
```

```
Out[ ]:= False
```

```
In[ ]:= g1 // Factor
```

```
Out[ ]:= 
$$\frac{2 \left( -14027 + 15420 e2 + 2826 e2^2 + 926 e2^3 + 72 e2^4 + 8 e2^5 \right)}{(2 + e2) \left( 17163 - 19172 e2 + 12044 e2^2 - 1888 e2^3 + 256 e2^4 \right)}$$

```

```
In[ ]:= g2 // Factor
```

```
Out[ ]:= 
$$- \left( \left( 2 \left( -126512084933352295 + 478399692835658985 e2 - 762458375238510816 e2^2 + \right. \right. \right. \\ \left. \left. \left. 730329622432012315 e2^3 - 466875108129002500 e2^4 + 180057388265535584 e2^5 - \right. \right. \right. \\ \left. \left. \left. 42412278548678749 e2^6 + 7565318705371668 e2^7 - 1899913140260206 e2^8 + \right. \right. \right. \\ \left. \left. \left. 200501244715092 e2^9 + 44607817747872 e2^{10} + 18408318367872 e2^{11} + \right. \right. \right. \\ \left. \left. \left. 8352995841088 e2^{12} + 1190085589888 e2^{13} + 348608893184 e2^{14} + 33760183296 e2^{15} + \right. \right. \right. \\ \left. \left. \left. 6787676672 e2^{16} + 473953280 e2^{17} + 64299008 e2^{18} + 2555904 e2^{19} + 196608 e2^{20} \right) \right) / \\ \left( 3 (2 + e2) (83 - 42 e2 + 8 e2^2) (-73 + 85 e2 + e2^2 + 2 e2^3)^2 (109 - 25 e2 + 32 e2^2 + 4 e2^3) \right. \\ \left. (17163 - 19172 e2 + 12044 e2^2 - 1888 e2^3 + 256 e2^4) \right. \\ \left. (23933 - 29628 e2 + 23764 e2^2 - 2976 e2^3 + 512 e2^4) \right)$$

```

```
In[ ]:= e2 = ;
```

```
e2 // N
```

```
Out[ ]:= 0.771291
```

## Perturbation

Setting e2 such that g1 = 0, g2 < 0, trace(J) = 0 (no perturbation)

```
In[ ]:= Quit
```

```

In[ ]:= ClearAll[xd, yd, c1, d1, d2, e1, e2, f1, f2, g1, g2, sol];
xd = x2 y + x y - c1 x2 - d1 x + e1 y + f1;
yd = -x2 y - x y + c1 x2 + d2 x - e2 y + f2;
f1 = 1; f2 = 2;
e1 =  $\frac{5}{10}$ ; d2 = 20;
d1 =  $\frac{d2 (2 + e1) + c1 (e1 - e2) + (2 + e2) f1 + (2 + e1) f2}{2 + e2}$ ;
c1 =  $\frac{d2 - d2 e1 - (2 + e2) (2 + e2 + f1) + f2 - e1 f2}{1 + e1 + e2}$ ;
e2 = 0.771...;
g1 =  $\frac{2 (-14027 + 15420 e2 + 2826 e2^2 + 926 e2^3 + 72 e2^4 + 8 e2^5)}{(2 + e2) (17163 - 19172 e2 + 12044 e2^2 - 1888 e2^3 + 256 e2^4)}$ ;
g2 = -  $\left( (2 (-126512084933352295 + 478399692835658985 e2 - 762458375238510816 e2^2 + 730329622432012315 e2^3 - 466875108129002500 e2^4 + 180057388265535584 e2^5 - 42412278548678749 e2^6 + 7565318705371668 e2^7 - 1899913140260206 e2^8 + 200501244715092 e2^9 + 44607817747872 e2^{10} + 18408318367872 e2^{11} + 8352995841088 e2^{12} + 1190085589888 e2^{13} + 348608893184 e2^{14} + 33760183296 e2^{15} + 6787676672 e2^{16} + 473953280 e2^{17} + 64299008 e2^{18} + 2555904 e2^{19} + 196608 e2^{20})) / \right.$ 
 $\left. \left( 3 (2 + e2) (83 - 42 e2 + 8 e2^2) (-73 + 85 e2 + e2^2 + 2 e2^3)^2 (109 - 25 e2 + 32 e2^2 + 4 e2^3) \right. \right.$ 
 $\left. \left. (17163 - 19172 e2 + 12044 e2^2 - 1888 e2^3 + 256 e2^4) \right. \right.$ 
 $\left. \left. (23933 - 29628 e2 + 23764 e2^2 - 2976 e2^3 + 512 e2^4) \right) \right)$ ;
{g1,
 g2} //
 N
Out[ ]:= {4.68034 × 10-18, -0.0278896}

In[ ]:= ClearAll[sol];
sol = Solve[{xd == 0, yd == 0}, {x, y}, Reals][[1]] // N
D[{xd, yd}, {{x, y}}] /. sol;
Eigenvalues[D[{xd, yd}, {{x, y}}] /. sol]
Out[ ]:= {x → 1., y → 8.02571}
Out[ ]:= {1.06859 × 10-15 + 1.14234 i, 1.06859 × 10-15 - 1.14234 i}

```

### 3.2.1. Perturbing e2 such that g1 > 0, g2 < 0, trace(J) = 0

```

In[ ]:= Quit

```

```

In[ ]:= ClearAll[xd, yd, c1, d1, d2, e1, e2, f1, f2, g1, g2, sol];
xd = x2 y + x y - c1 x2 - d1 x + e1 y + f1;
yd = -x2 y - x y + c1 x2 + d2 x - e2 y + f2;
f1 = 1; f2 = 2;
e1 =  $\frac{5}{10}$ ; d2 = 20;
d1 =  $\frac{d2 (2 + e1) + c1 (e1 - e2) + (2 + e2) f1 + (2 + e1) f2}{2 + e2}$ ;
c1 =  $\frac{d2 - d2 e1 - (2 + e2) (2 + e2 + f1) + f2 - e1 f2}{1 + e1 + e2}$ ;
e2 =  $\frac{78}{100}$ ; (*perturbed parameter for g1>0*)
g1 =  $\frac{2 (-14 027 + 15 420 e2 + 2826 e2^2 + 926 e2^3 + 72 e2^4 + 8 e2^5)}{(2 + e2) (17 163 - 19 172 e2 + 12 044 e2^2 - 1888 e2^3 + 256 e2^4)}$ ;
g2 = -  $\left( (2 (-126 512 084 933 352 295 + 478 399 692 835 658 985 e2 - 762 458 375 238 510 816 e2^2 + 730 329 622 432 012 315 e2^3 - 466 875 108 129 002 500 e2^4 + 180 057 388 265 535 584 e2^5 - 42 412 278 548 678 749 e2^6 + 7 565 318 705 371 668 e2^7 - 1 899 913 140 260 206 e2^8 + 200 501 244 715 092 e2^9 + 44 607 817 747 872 e2^{10} + 18 408 318 367 872 e2^{11} + 8 352 995 841 088 e2^{12} + 1 190 085 589 888 e2^{13} + 348 608 893 184 e2^{14} + 33 760 183 296 e2^{15} + 6 787 676 672 e2^{16} + 473 953 280 e2^{17} + 64 299 008 e2^{18} + 2 555 904 e2^{19} + 196 608 e2^{20})) / \right.$ 
 $\left. \left( 3 (2 + e2) (83 - 42 e2 + 8 e2^2) (-73 + 85 e2 + e2^2 + 2 e2^3) (109 - 25 e2 + 32 e2^2 + 4 e2^3) (17 163 - 19 172 e2 + 12 044 e2^2 - 1888 e2^3 + 256 e2^4) (23 933 - 29 628 e2 + 23 764 e2^2 - 2976 e2^3 + 512 e2^4) \right) \right)$ ;
{c1, d1}
{c1, d1} // N
{g1, g2} // N
Out[ ]:=  $\left\{ \frac{1229}{5700}, \frac{59173}{2850} \right\}$ 
Out[ ]:= {0.215614, 20.7625}
Out[ ]:= {0.015511, -0.666999}
In[ ]:= ClearAll[sol];
sol = Solve[{xd == 0, yd == 0}, {x, y}, Reals][[1]] // N
D[{xd, yd}, {{x, y}}] /. sol;
Eigenvalues[D[{xd, yd}, {{x, y}}] /. sol] // FullSimplify
Out[ ]:= {x → 1., y → 7.99123}
Out[ ]:=  $\{-1.6237 \times 10^{-15} + 1.06195 i, -1.6237 \times 10^{-15} - 1.06195 i\}$ 

```

### 3.2.2. Perturbing c1 and e2 such that g1 > 0, g2 < 0, trace(J) < 0

```

In[ ]:= Quit

```

```

In[ ]:= ClearAll[xd, yd, c1, d1, d2, e1, e2, f1, f2, g1, g2, sol];
xd = x2 y + x y - c1 x2 - d1 x + e1 y + f1;
yd = -x2 y - x y + c1 x2 + d2 x - e2 y + f2;
f1 = 1; f2 = 2;
e1 =  $\frac{5}{10}$ ; d2 = 20;
d1 =  $\frac{d2 (2 + e1) + c1 (e1 - e2) + (2 + e2) f1 + (2 + e1) f2}{2 + e2}$ ;
c1 =  $\frac{22}{100}$ ; (*perturbed parameter for trace(J) < 0*)
e2 =  $\frac{78}{100}$ ; (*perturbed parameter for g1 > 0*)
g1 =  $\frac{2 (-14027 + 15420 e2 + 2826 e2^2 + 926 e2^3 + 72 e2^4 + 8 e2^5)}{(2 + e2) (17163 - 19172 e2 + 12044 e2^2 - 1888 e2^3 + 256 e2^4)}$ ;
g2 = - ( (2 (-126512084933352295 + 478399692835658985 e2 - 762458375238510816 e22 +
730329622432012315 e23 - 466875108129002500 e24 + 180057388265535584 e25 -
42412278548678749 e26 + 7565318705371668 e27 - 1899913140260206 e28 +
200501244715092 e29 + 44607817747872 e210 + 18408318367872 e211 +
8352995841088 e212 + 1190085589888 e213 + 348608893184 e214 + 33760183296 e215 +
6787676672 e216 + 473953280 e217 + 64299008 e218 + 2555904 e219 + 196608 e220) ) /
(3 (2 + e2) (83 - 42 e2 + 8 e22) (-73 + 85 e2 + e22 + 2 e23)2 (109 - 25 e2 + 32 e22 + 4 e23)
(17163 - 19172 e2 + 12044 e22 - 1888 e23 + 256 e24)
(23933 - 29628 e2 + 23764 e22 - 2976 e23 + 512 e24)) );
{c1, d1}
{c1, d1} // N
{g1, g2} // N
Out[ ]:= { $\frac{11}{50}, \frac{72148}{3475}$ }
Out[ ]:= {0.22, 20.762}
Out[ ]:= {0.015511, -0.666999}
In[ ]:= ClearAll[sol];
sol = Solve[{xd == 0, yd == 0}, {x, y}, Reals][[1]] // N
D[{xd, yd}, {{x, y}}] /. sol;
Eigenvalues[D[{xd, yd}, {{x, y}}] /. sol]
Out[ ]:= {x → 1., y → 7.99281}
Out[ ]:= {-0.00179856 + 1.0619 i, -0.00179856 - 1.0619 i}
In[ ]:= -0.0017985611510798125` * 2
Out[ ]:= -0.00359712

```

### 3.2.1. Plotting the limit cycles when $g1 > 0$ , $g2 < 0$ ,

# trace(J) = 0

## Preparations

In[ ]:= Quit

```
In[ ]:= SetOptions[#, AxesStyle → Arrowheads[Automatic]] & /@
        {Plot, ParametricPlot, ListPlot, ListLinePlot};
SetDirectory[NotebookDirectory[]];
SetOptions[#, AxesStyle → Arrowheads[Automatic]] & /@ {Plot, ListPlot,
        ListLinePlot, ListLogLogPlot, ParametricPlot, DateListPlot, DiscretePlot};
LaunchKernels[];
```

## The function creating the plots

```
In[ ]:= ClearAll[p, q, x, y, c1, d1, d2, e1, e2, f1, f2];
p[x_, y_] := x2 y + x y - c1 x2 - d1 x + e1 y + f1;
q[x_, y_] := -x2 y - x y + c1 x2 + d2 x - e2 y + f2;
f1 = 1; f2 = 2;
e1 =  $\frac{5}{10}$ ; d2 = 20;
d1 =  $\frac{d2 (2 + e1) + c1 (e1 - e2) + (2 + e2) f1 + (2 + e1) f2}{2 + e2}$ ;
c1 =  $\frac{d2 - d2 e1 - (2 + e2) (2 + e2 + f1) + f2 - e1 f2}{1 + e1 + e2}$ ;
e2 =  $\frac{78}{100}$ ; (*perturbed parameter for g1>0*)
{e2, e1, d2, d1, f1, f2, c1}
{e2, e1, d2, d1, f1, f2, c1} // N
Out[ ]:= { $\frac{39}{50}$ ,  $\frac{1}{2}$ , 20,  $\frac{59173}{2850}$ , 1, 2,  $\frac{1229}{5700}$ }
Out[ ]:= {0.78, 0.5, 20., 20.7625, 1., 2., 0.215614}
```

```

In[ ]:= ClearAll[nsol, ev, plotter];
nsol = First@NSolve[Join@@Thread/@{{p[x, y], q[x, y]} == 0, {x, y} > 0}, {x, y}, 20]
ev = Eigenvalues[D[{p[x, y], q[x, y]}, {{x, y}}] /. nsol]
plotter[τ_, shift_, ag_ : Automatic, pg_ : Automatic, pp_ : 1000,
  ar_ : Automatic, opts___] := Module[{startingpoint, sys, solution, plot1},
  startingpoint = ({x, y} /. nsol) + shift;
  sys := NDSolveValue[Join[{u'[t] == p[u[t], v[t]], v'[t] == q[u[t], v[t]]},
    Thread[{u[0], v[0]} == startingpoint}],
    {u, v}, {t, τ}, AccuracyGoal → ag, PrecisionGoal → pg, opts];
  solution[t_] := Through[sys[t]];
  {ParametricPlot[Evaluate[solution[t]],
    {t, 0, τ}, Epilog → {Red, PointSize[0.05], Point[startingpoint],
    Orange, Point[{x, y} /. nsol]}, PlotRange → All, PlotPoints → pp,
    AspectRatio → ar, AxesLabel → {x, y}, LabelStyle → Directive[14], ImageSize → 200],
  Plot[Evaluate[solution[t][[1]], {t, 0, τ}, PlotRange → All, PlotPoints → pp,
    AxesLabel → {t, x}, LabelStyle → Directive[12], ImageSize → 200],
  Plot[Evaluate[solution[t][[2]], {t, 0, τ}, PlotRange → All, PlotPoints → pp,
    AxesLabel → {t, y}, LabelStyle → Directive[12], ImageSize → 200]}]

Out[ ]:= {x → 1.000000000000000000, y → 7.9912280701754385965}

Out[ ]:= {1.896901190933694959 × 10-21 + 1.061951199856750942 i,
  1.896901190933694959 × 10-21 - 1.061951199856750942 i}

```



## Plotter with arrow

```

In[ ]:= ClearAll[nsol, ev, plotterarrow];
nsol = First@NSolve[Join@@Thread /@ {{p[x, y], q[x, y]} = 0, {x, y} > 0}, {x, y}, 20]
ev = Eigenvalues[D[{{p[x, y], q[x, y]}, {x, y}}] /. nsol]
plotterarrow[τ_, shift_, ag_ : Automatic, pg_ : Automatic, pp_ : 1000, ar_ : Automatic,
  arrow_, opts___] := Module[{startingpoint, sys, solution, plot1},
  startingpoint = ({x, y} /. nsol) + shift;
  sys := NDSolveValue[Join[{u'[t] == p[u[t], v[t]], v'[t] == q[u[t], v[t]]},
    Thread[{u[0], v[0]} == startingpoint}],
    {u, v}, {t, τ}, AccuracyGoal → ag, PrecisionGoal → pg, opts];
  solution[t_] := Through[sys[t]];
  {ParametricPlot[Evaluate[solution[t]], {t, 0, τ},
    Epilog → {Black, Arrowheads → 0.07, Arrow[{startingpoint, arrow}],
      Red, PointSize[0.05], Point[startingpoint], Orange,
      Point[{x, y} /. nsol]
    }, PlotRange → All, PlotPoints → pp, AspectRatio → ar,
    AxesLabel → {x, y}, LabelStyle → Directive[14], ImageSize → 200],
  Plot[Evaluate[solution[t][[1]], {t, 0, τ}, PlotRange → All, PlotPoints → pp,
    AxesLabel → {t, x}, LabelStyle → Directive[12], ImageSize → 200],
  Plot[Evaluate[solution[t][[2]], {t, 0, τ}, PlotRange → All, PlotPoints → pp,
    AxesLabel → {t, y}, LabelStyle → Directive[12], ImageSize → 200]}}]

Out[ ]:= {x → 1.00000000000000000000, y → 7.9912280701754385965}

Out[ ]:= {1.896901190933694959 × 10-21 + 1.061951199856750942 i,
  1.896901190933694959 × 10-21 - 1.061951199856750942 i}

```

Figure 2

```
In[ ]:= plotter[100, {0, 10}, Automatic, 100, 1000, Automatic, Method -> "BDF"]
plotterarrow[100, {0, 10}, Automatic,
100, 1000, Automatic, {3.586, 15.36}, Method -> "BDF"]
```

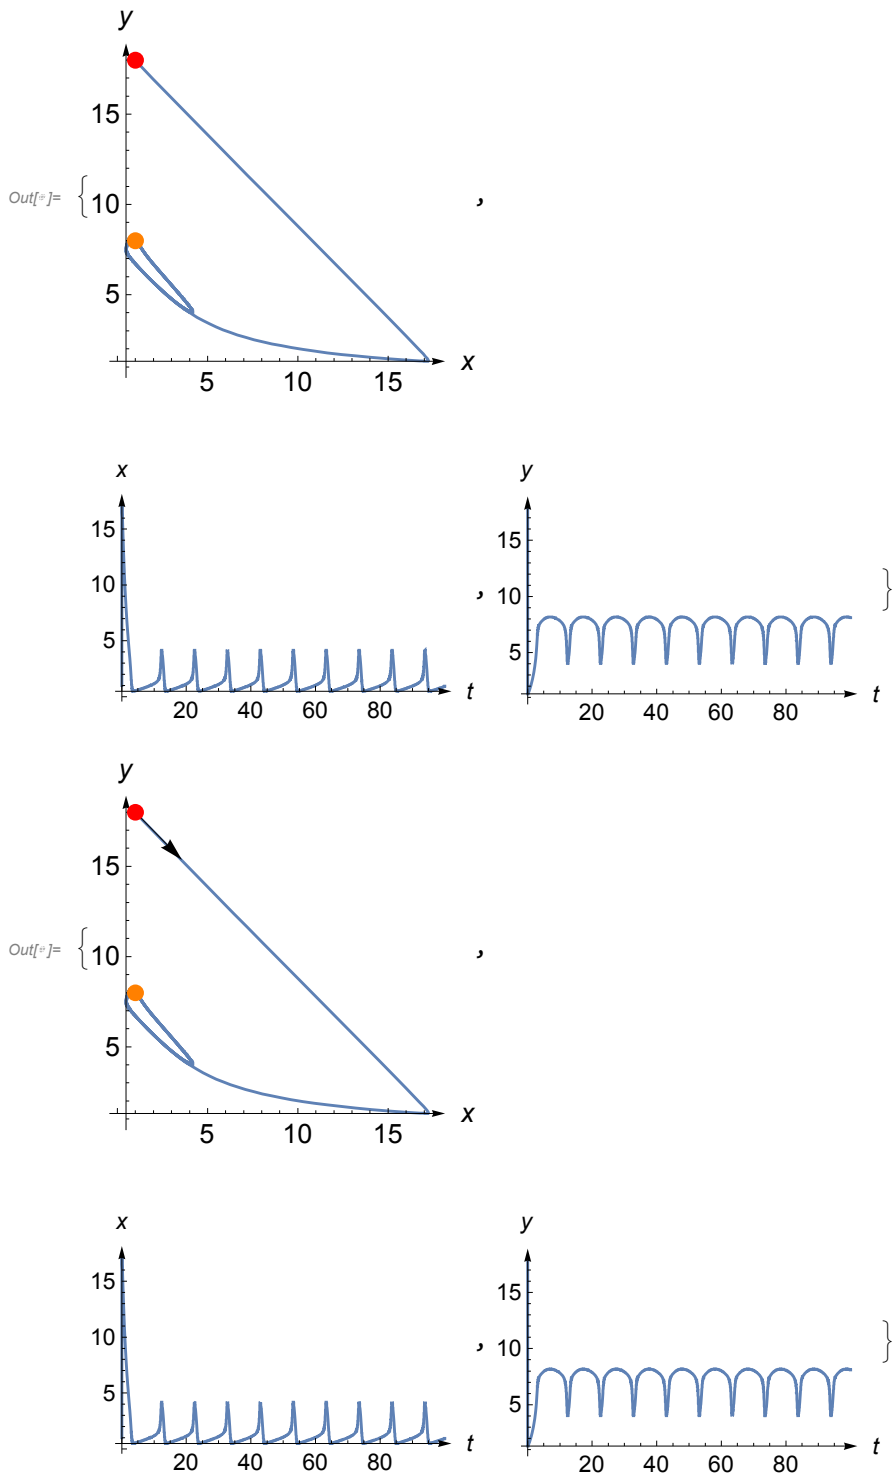

Figure 3

```
In[ ]:= plotter[120, {0, 0.038}, Automatic, 100, 1000, Automatic, Method → "BDF"]
```

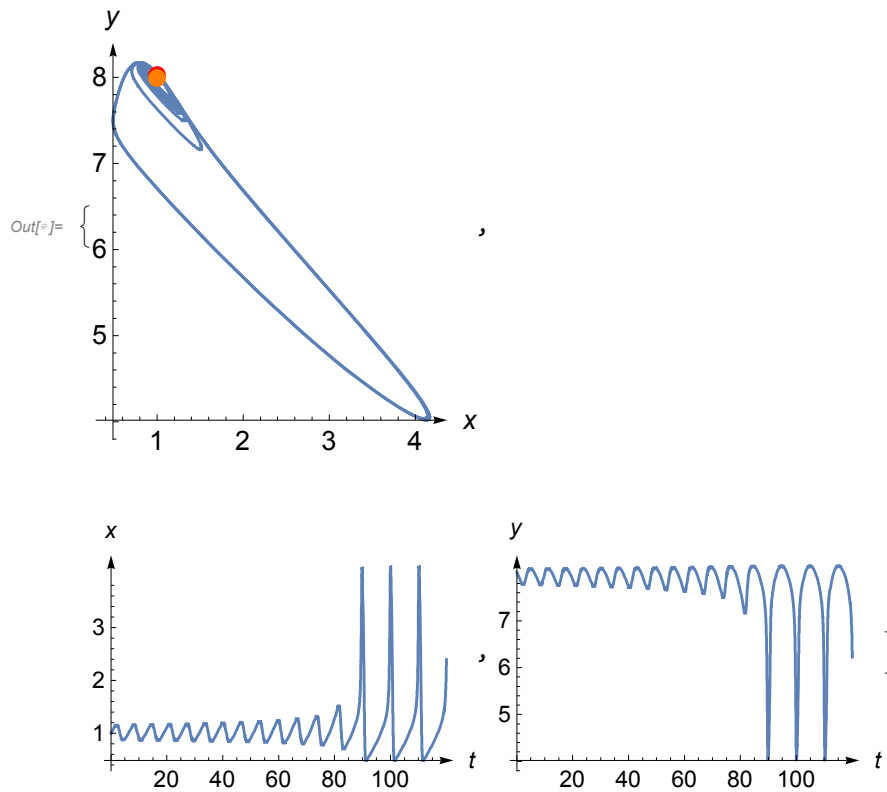

### 3.2.2. Plotting the limit cycles when $g_1 > 0$ , $g_2 < 0$ , $\text{trace}(J) < 0$

#### Preparations

```
In[ ]:= Quit
```

```
In[ ]:= SetOptions [# , AxesStyle → Arrowheads [Automatic]] & /@
  {Plot, ParametricPlot, ListPlot, ListLinePlot};
SetDirectory [NotebookDirectory []];
SetOptions [# , AxesStyle → Arrowheads [Automatic]] & /@ {Plot, ListPlot,
  ListLinePlot, ListLogLogPlot, ParametricPlot, DateListPlot, DiscretePlot};
LaunchKernels [];
```

## The function creating the plots

```

In[ ]:= ClearAll[p, q, x, y, c1, d1, d2, e1, e2, f1, f2];
p[x_, y_] := x2y + xy - c1 x2 - d1 x + e1 y + f1;
q[x_, y_] := -x2y - xy + c1 x2 + d2 x - e2 y + f2;
f1 = 1; f2 = 2;
e1 =  $\frac{5}{10}$ ; d2 = 20;
d1 =  $\frac{d2(2 + e1) + c1(e1 - e2) + (2 + e2)f1 + (2 + e1)f2}{2 + e2}$ ;
c1 =  $\frac{22}{100}$ ; (*perturbed parameter for trace(J) < 0*)
e2 =  $\frac{78}{100}$ ; (*perturbed parameter for g1 > 0*)
{e2, e1, d2, d1, f1, f2, c1}
{e2, e1, d2, d1, f1, f2, c1} // N
Out[ ]:= { $\frac{39}{50}$ ,  $\frac{1}{2}$ , 20,  $\frac{72148}{3475}$ , 1, 2,  $\frac{11}{50}$ }
Out[ ]:= {0.78, 0.5, 20., 20.762, 1., 2., 0.22}

In[ ]:= ClearAll[nsol, ev, plotter];
nsol = First@NSolve[Join@@Thread/@{{p[x, y], q[x, y]} == 0, {x, y} > 0}, {x, y}, 20]
ev = Eigenvalues[D[{p[x, y], q[x, y]}, {x, y}]] /. nsol]
plotter[τ_, shift_, ag_ : Automatic, pg_ : Automatic, pp_ : 1000,
ar_ : Automatic, opts___] := Module[{startingpoint, sys, solution, plot1},
startingpoint = ({x, y} /. nsol) + shift;
sys := NDSolveValue[Join[{u'[t] == p[u[t], v[t]], v'[t] == q[u[t], v[t]]},
Thread[{u[0], v[0]} == startingpoint}],
{u, v}, {t, τ}, AccuracyGoal → ag, PrecisionGoal → pg, opts];
solution[t_] := Through[sys[t]];
{ParametricPlot[Evaluate[solution[t]], {t, 0, τ}, Epilog →
{Red, PointSize[0.05], Point[startingpoint], Orange, Point[{x, y} /. nsol]},
PlotRange → All, PlotPoints → pp, AspectRatio → ar, AxesLabel → {x, y},
LabelStyle → Directive[14], ImageSize → 200],
Plot[Evaluate[solution[t][[1]], {t, 0, τ}, PlotRange → All, PlotPoints → pp,
AxesLabel → {t, x}, LabelStyle → Directive[12], ImageSize → 200],
Plot[Evaluate[solution[t][[2]], {t, 0, τ}, PlotRange → All, PlotPoints → pp,
AxesLabel → {t, y}, LabelStyle → Directive[12], ImageSize → 200]}}]
Out[ ]:= {x → 1.00000000000000000000, y → 7.9928057553956834532}
Out[ ]:= {-0.001798561151079136689 + 1.061903917803024083 i,
-0.001798561151079136689 - 1.061903917803024083 i}

```

## Plotter with arrow

```

In[ ]:= ClearAll[nsol, ev, plotterarrow];
nsol = First@NSolve[Join@@Thread /@ {{p[x, y], q[x, y]} = 0, {x, y} > 0}, {x, y}, 20]
ev = Eigenvalues[D[{{p[x, y], q[x, y]}, {x, y}}] /. nsol]
plotterarrow[τ_, shift_, ag_ : Automatic, pg_ : Automatic, pp_ : 1000, ar_ : Automatic,
  arrow_, opts___] := Module[{startingpoint, sys, solution, plot1},
  startingpoint = ({x, y} /. nsol) + shift;
  sys := NDSolveValue[Join[{u'[t] == p[u[t], v[t]], v'[t] == q[u[t], v[t]]},
    Thread[{u[0], v[0]} == startingpoint]],
    {u, v}, {t, τ}, AccuracyGoal → ag, PrecisionGoal → pg, opts];
  solution[t_] := Through[sys[t]];
  {ParametricPlot[Evaluate[solution[t]], {t, 0, τ},
    Epilog → {Black, Arrowheads → 0.07, Arrow[{startingpoint, arrow}],
      Red, PointSize[0.05], Point[startingpoint], Orange,
      Point[{x, y} /. nsol]
    }, PlotRange → All, PlotPoints → pp, AspectRatio → ar,
    AxesLabel → {x, y}, LabelStyle → Directive[14], ImageSize → 200],
  Plot[Evaluate[solution[t][[1]], {t, 0, τ}, PlotRange → All, PlotPoints → pp,
    AxesLabel → {t, x}, LabelStyle → Directive[12], ImageSize → 200],
  Plot[Evaluate[solution[t][[2]], {t, 0, τ}, PlotRange → All, PlotPoints → pp,
    AxesLabel → {t, y}, LabelStyle → Directive[12], ImageSize → 200]}}]

Out[ ]:= {x → 1.00000000000000000000, y → 7.9928057553956834532}

Out[ ]:= {-0.001798561151079136689 + 1.061903917803024083 i,
  -0.001798561151079136689 - 1.061903917803024083 i}

```

Figure 4

```
In[ ]:= plotter[100, {0, 10}, Automatic, 100, 1000, Automatic, Method -> "BDF"]
plotterarrow[100, {0, 10}, Automatic,
100, 1000, Automatic, {3.586, 15.36}, Method -> "BDF"]
```

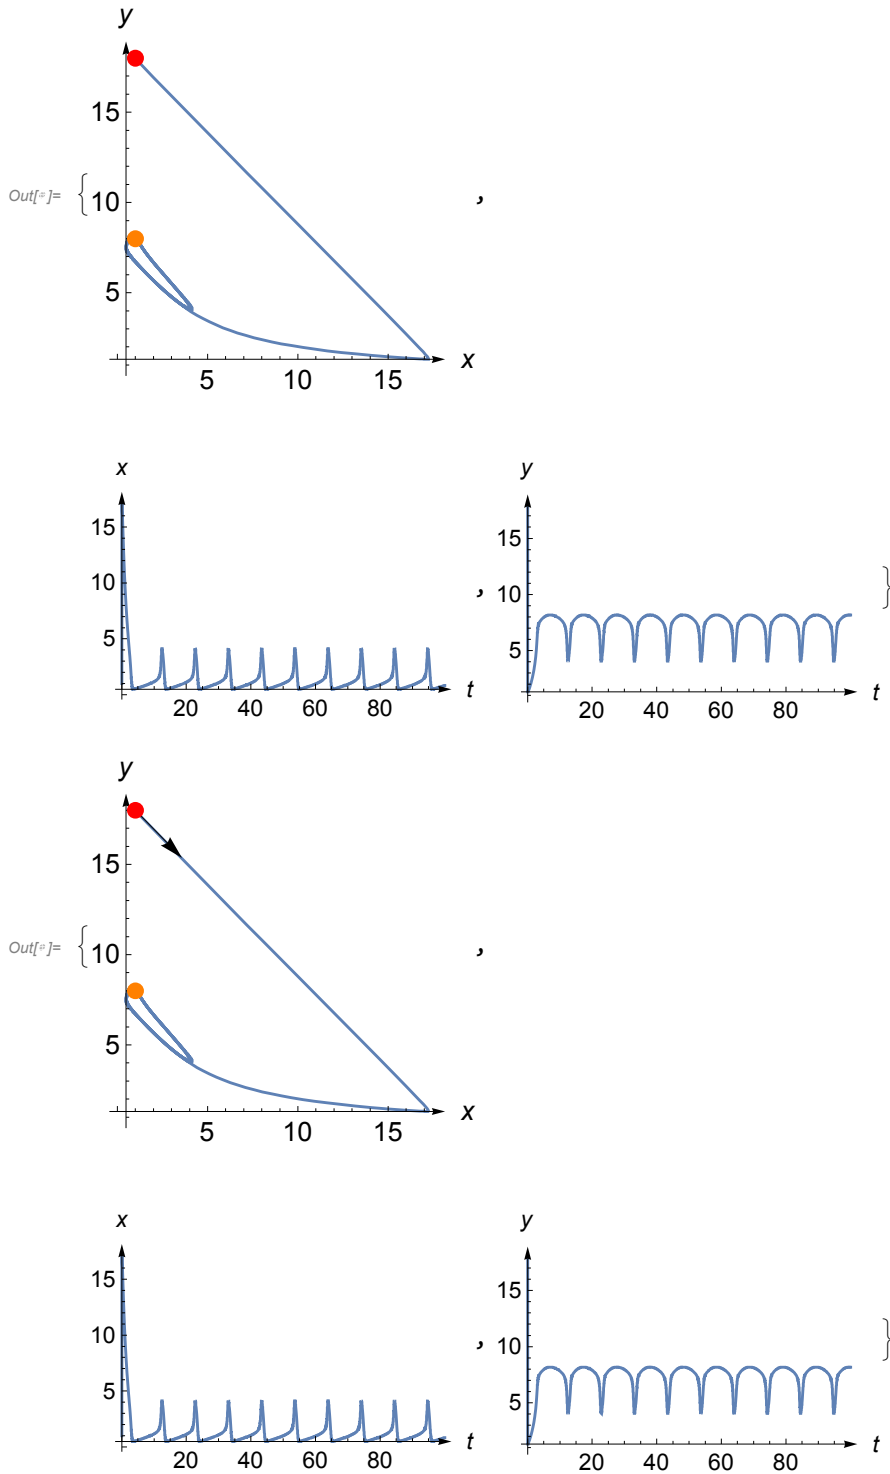

Figure 5

```
In[ ]:= plotter[120, {0, 0.042}, Automatic, 100, 1000, Automatic, Method -> "BDF"]
```

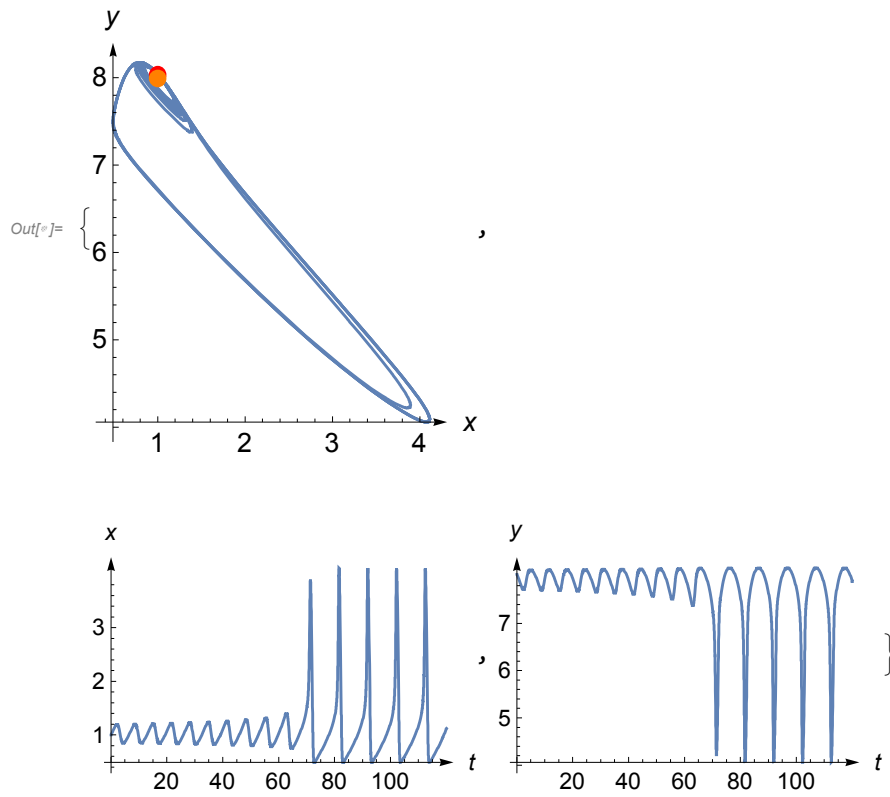

Figure 6

```
In[ ]:= plotter[120, {0, 0.038}, Automatic, 100, 1000, Automatic, Method -> "BDF"]
plotterarrow[120, {0, 0.038}, Automatic,
100, 1000, Automatic, {1.066, 7.956}, Method -> "BDF"]
```

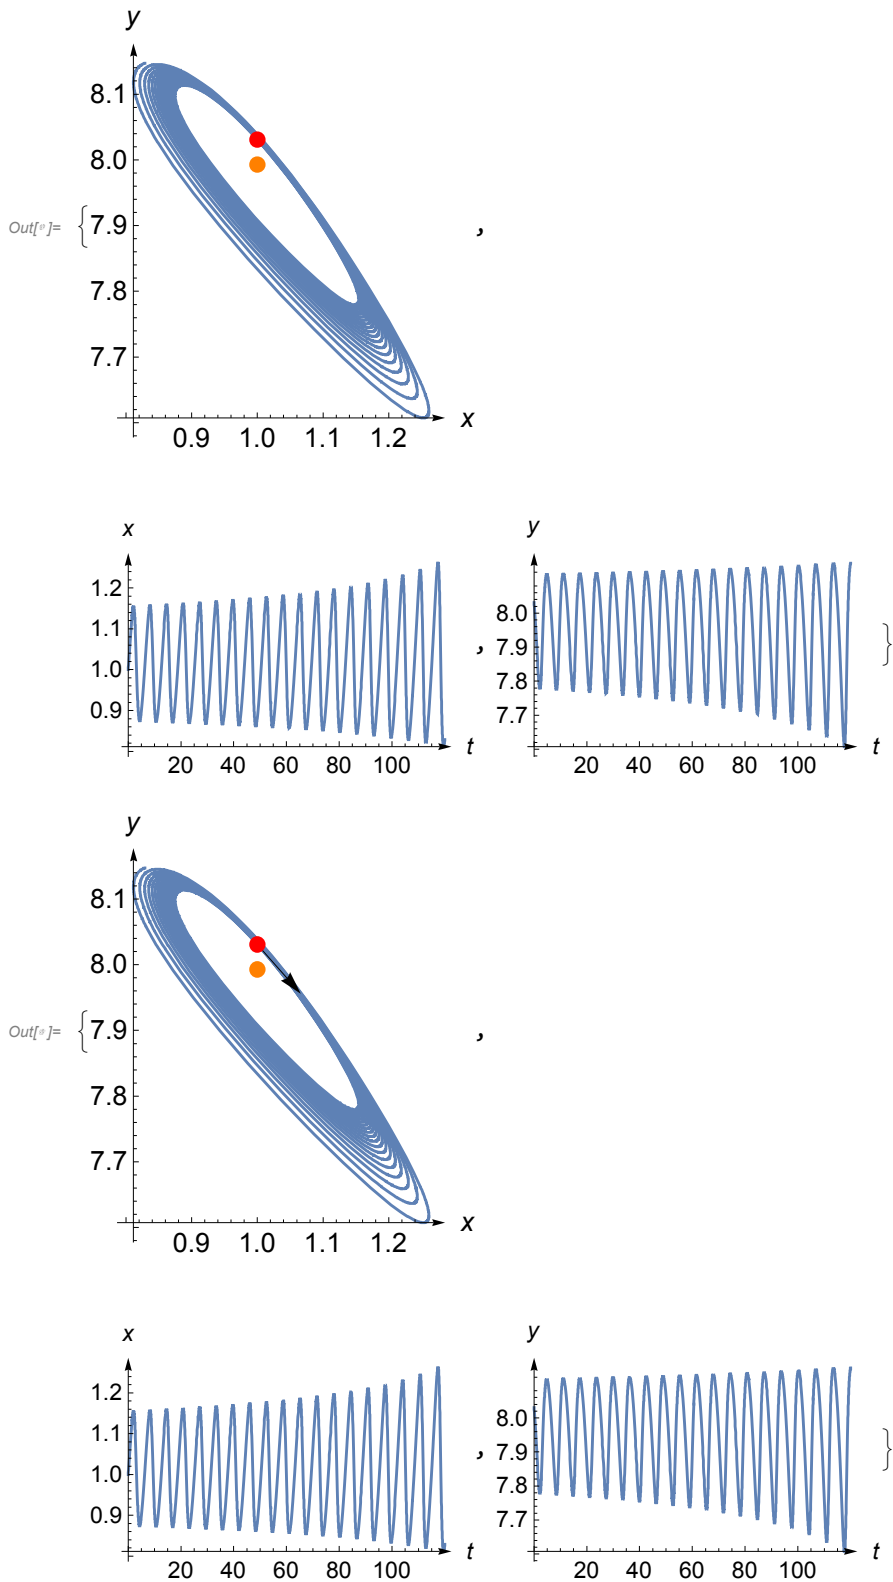



Figure 7

```

In[ ]:= plotter[200, {0, 0.01}, Automatic, 100, 1000, Automatic, Method -> "BDF"]
plotterarrow[200, {0, 0.01}, Automatic,
  100, 1000, Automatic, {1.007, 7.994}, Method -> "BDF"]

```

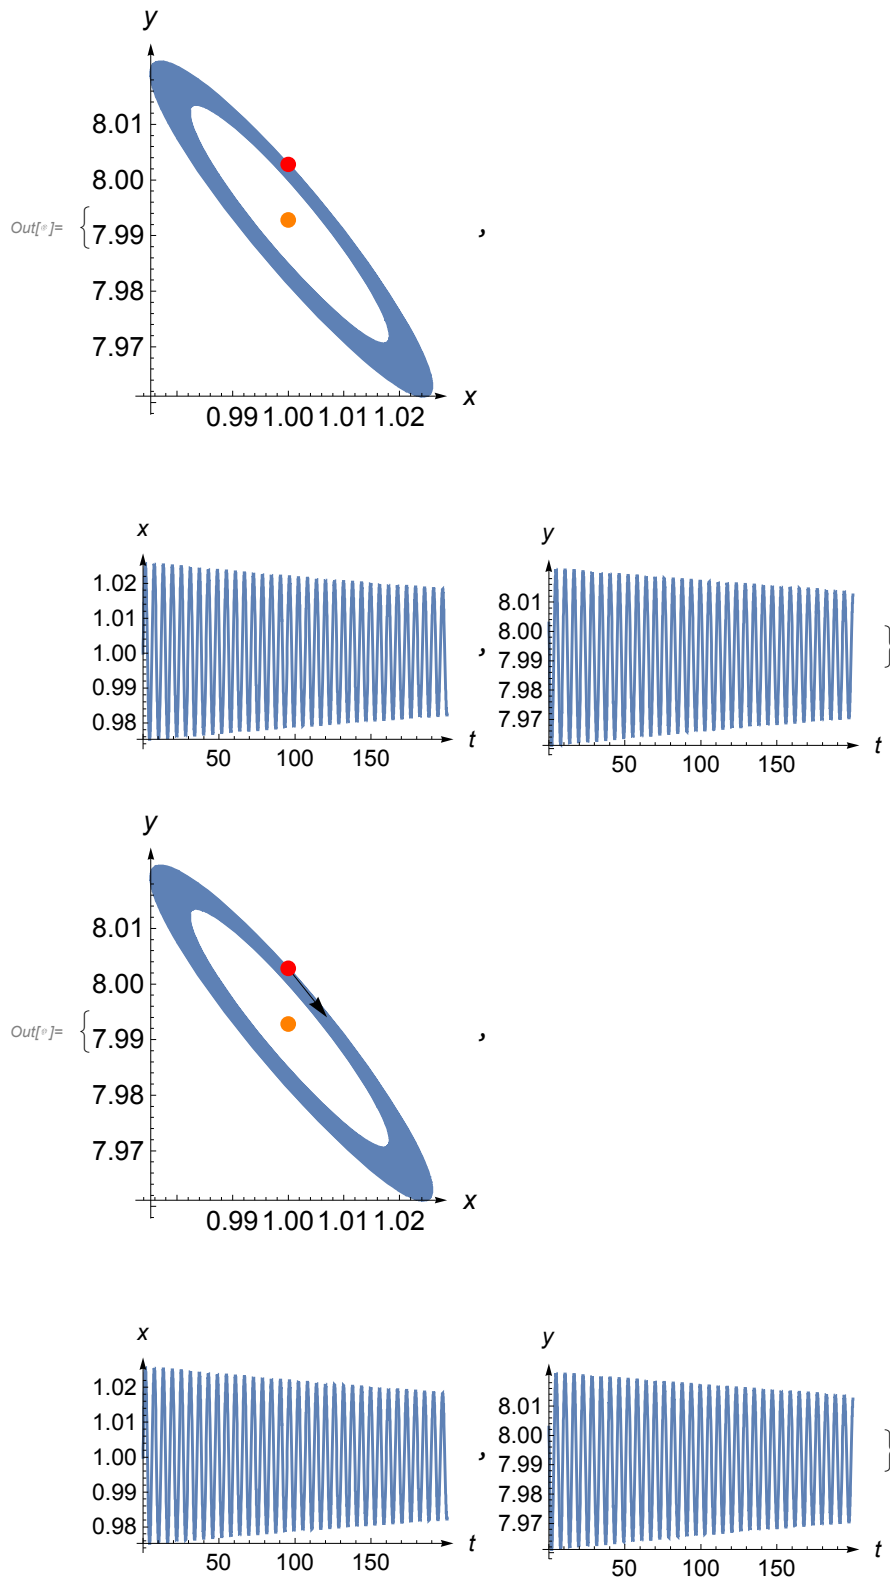

# Model 2 with an unstable outer a stable inner limit cycle

## Preparations

### System (19)

$$\begin{aligned}x' &= x^2 y - x y - c_1 x^2 - d_1 x + e_1 y + f_1 \\y' &= -x^2 y + x y + c_1 x^2 + d_2 x - e_2 y + f_2\end{aligned}$$

$$c_1, d_1, d_2, e_1, e_2, f_1, f_2 \geq 0$$

### The ReactionKinetics program package

The ReactionKinetics program package is available at <http://extras.springer.com> (ISBN: 978-1-4939-8643-9).

It can be used if either ReactionKinetics.m is put in the same folder as this notebook or ReactionKinetics.wl is added in the packages in the applications.

In[\*]:= **Quit**

```
In[*]:= SetDirectory[NotebookDirectory[]];
SetOptions[#, AxesStyle -> Arrowheads[Automatic]] & /@
{ContourPlot, DateListPlot, Plot, ListLinePlot, ListPlot, ListLogPlot,
LogLinearPlot, LogPlot, ParametricPlot, Plot3D, RegionPlot};
LaunchKernels[];
Needs["ReactionKinetics`"];
```

... **LaunchKernels:** Some subkernels are already running. Not launching default kernels again.

## Figure 8: Creating the reaction graph with the help of the ReactionKinetics package

```

In[ ]:= ClearAll[model2];
model2 = {2 X + Y → 3 X, X → 0, 2 X → X + Y → 2 Y, 0 → X → X + Y, 0 → Y → X + Y, Y → 0};
RightHandSide[{model2}, {1, d1, c1, 1, f1, d2, f2, e1, e2}, {x, y}]
model2fig = ShowFHJGraph[model2, {1, d1, c1, 1, f1, d2, f2, e1, e2}, DirectedEdges → True,
  VertexLabels → Automatic, EdgeLabelStyle → Directive[Red, Italic, 16],
  VertexLabelStyle → Directive[Blue, 16], GraphLayout → "TutteEmbedding"]
Out[ ]:= {f1 - d1 x - c1 x^2 + e1 y - x y + x^2 y, f2 + d2 x + c1 x^2 - e2 y + x y - x^2 y}

```

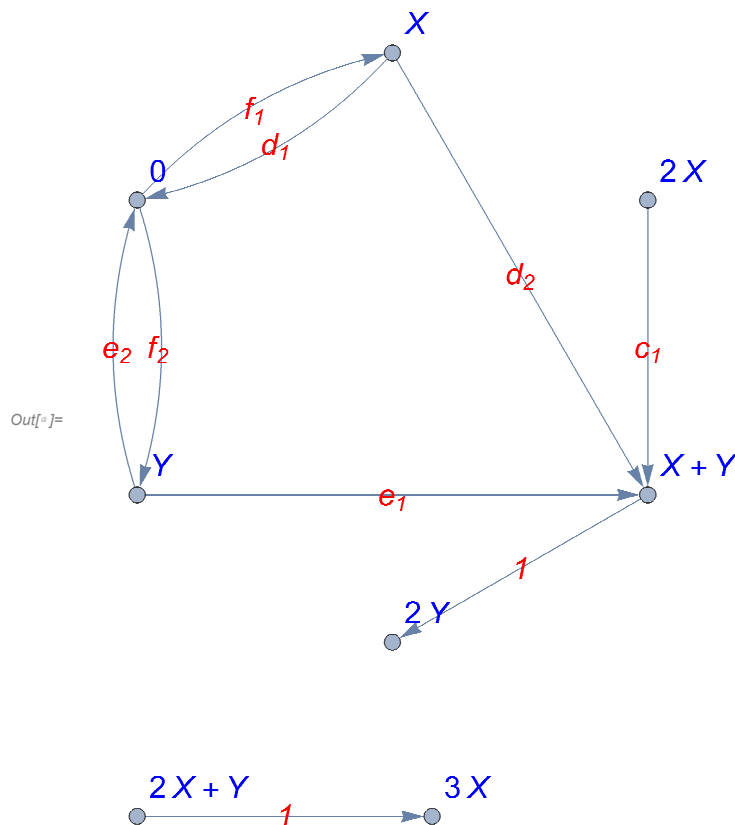

```

In[ ]:= Export["Fig-8-Model2.pdf", model2fig]

```

Out[ ]:= Fig-8-Model2.pdf

## The singular point is shifted into the origin

Singular points if  $x_0 = 1$

```

In[ ]:= Quit

```

```
In[ ]:= ClearAll[xd, yd, x, y, c1, d1, d2, e1, e2, f1, f2];
xd = x2 y - x y - c1 x2 - d1 x + e1 y + f1;
yd = -x2 y + x y + c1 x2 + d2 x - e2 y + f2;
Solve[{xd == 0, yd == 0} /. x -> 1, {d1, y}] // FullSimplify
```

```
Out[ ]:= {{d1 ->  $\frac{c1 (e1 - e2) + e2 f1 + e1 (d2 + f2)}{e2}$ , y ->  $\frac{c1 + d2 + f2}{e2}$ }}
```

The singular point (if  $x_0 = 1$ ) is shifted into  $(0, 0)$

```
In[ ]:= ClearAll[xd, yd, x, y, c1, d1, d2, e1, e2, f1, f2, x0, y0, x1d, y1d, xx1, yy1];
xd = x2 y - x y - c1 x2 - d1 x + e1 y + f1;
yd = -x2 y + x y + c1 x2 + d2 x - e2 y + f2;
x0 = 1;
d1 =  $\frac{c1 (e1 - e2) + e2 f1 + e1 (d2 + f2)}{e2}$ ; y0 =  $\frac{c1 + d2 + f2}{e2}$ ;
xx1 = x - x0; yy1 = y - y0;
x1d = D[xx1, x] xd + D[xx1, y] yd /. {x -> x1 + x0, y -> y1 + y0} // Factor
y1d = D[yy1, x] xd + D[yy1, y] yd /. {x -> x1 + x0, y -> y1 + y0} // Factor
```

```
Out[ ]:= - $\frac{1}{e2}$  (-c1 x1 - d2 x1 + c1 e1 x1 + d2 e1 x1 + c1 e2 x1 + e2 f1 x1 - f2 x1 +
e1 f2 x1 - c1 x12 - d2 x12 + c1 e2 x12 - f2 x12 - e1 e2 y1 - e2 x1 y1 - e2 x12 y1)
```

```
Out[ ]:= - $\frac{1}{e2}$  (c1 x1 + d2 x1 - 2 c1 e2 x1 - d2 e2 x1 +
f2 x1 + c1 x12 + d2 x12 - c1 e2 x12 + f2 x12 + e22 y1 + e2 x1 y1 + e2 x12 y1)
```

## The Jacobian at the origin

```
In[ ]:= Jac = D[{x1d, y1d}, {{x1, y1}}];
JacOrigin = Jac /. {x1 -> 0, y1 -> 0} // Simplify
```

```
Out[ ]:= {{ $\frac{d2 - d2 e1 - c1 (-1 + e1 + e2) - e2 f1 + f2 - e1 f2}{e2}$ , e1}, {- $\frac{c1 + d2 - 2 c1 e2 - d2 e2 + f2}{e2}$ , -e2}}
```

```
In[ ]:= trace = Tr[JacOrigin] // Factor
Solve[trace == 0, c1] // FullSimplify
```

```
Out[ ]:= - $\frac{-c1 - d2 + c1 e1 + d2 e1 + c1 e2 + e22 + e2 f1 - f2 + e1 f2}{e2}$ 
```

```
Out[ ]:= {{c1 ->  $\frac{d2 - d2 e1 - e2 (e2 + f1) + f2 - e1 f2}{-1 + e1 + e2}$ }}
```

$$\text{In}[^*]:= \mathbf{c1} = \frac{d2 - d2 e1 - e2 (e2 + f1) + f2 - e1 f2}{-1 + e1 + e2};$$

**evalues = Eigenvalues [JacOrigin] // FullSimplify**

$$\text{Out}[^*]= \left\{ -\frac{1}{\sqrt{-1 + e1 + e2}}, \right. \\ \left. i \sqrt{\left( d2 e1 (e1 - e2) - (-1 + e2) e2^2 + e1 (-f1 + e2 (-1 + e2 + 2 f1) - f2) + 2 e1^2 f2 \right)}, \right. \\ \left. \frac{1}{\sqrt{-1 + e1 + e2}}, \right. \\ \left. i \sqrt{\left( d2 e1 (e1 - e2) - (-1 + e2) e2^2 + e1 (-f1 + e2 (-1 + e2 + 2 f1) - f2) + 2 e1^2 f2 \right)} \right\}$$

$$\text{In}[^*]:= \mathbf{beta} = -\text{evalues}[[1]]^2 // \text{Factor}$$

$$\text{Out}[^*]= \frac{1}{-1 + e1 + e2} (d2 e1^2 - e1 e2 - d2 e1 e2 + e2^2 + e1 e2^2 - e2^3 - e1 f1 + 2 e1 e2 f1 - e1 f2 + 2 e1^2 f2)$$

$$\text{In}[^*]:= \mathbf{pp} = \mathbf{x1d} /. \{x1 \rightarrow x, y1 \rightarrow y\} // \text{Factor}$$

$$\mathbf{qq} = \mathbf{y1d} /. \{x1 \rightarrow x, y1 \rightarrow y\} // \text{Factor}$$

$$\text{Out}[^*]= \frac{1}{-1 + e1 + e2} (-e2 x + e1 e2 x + e2^2 x + d2 e1 x^2 - e2 x^2 + e2^2 x^2 - f1 x^2 + e2 f1 x^2 + \\ e1 f2 x^2 - e1 y + e1^2 y + e1 e2 y - x y + e1 x y + e2 x y - x^2 y + e1 x^2 y + e2 x^2 y)$$

$$\text{Out}[^*]= -\frac{1}{-1 + e1 + e2} \\ (d2 e1 x - e2 x - d2 e2 x + 2 e2^2 x - f1 x + 2 e2 f1 x - f2 x + 2 e1 f2 x + d2 e1 x^2 - e2 x^2 + e2^2 x^2 - \\ f1 x^2 + e2 f1 x^2 + e1 f2 x^2 - e2 y + e1 e2 y + e2^2 y - x y + e1 x y + e2 x y - x^2 y + e1 x^2 y + e2 x^2 y)$$

## Lyapunov's theorem

### System

$$\text{In}[^*]:= \mathbf{Quit}$$

$$\text{In}[^*]:= \mathbf{pp} = \frac{1}{-1 + e1 + e2} (-e2 x + e1 e2 x + e2^2 x + d2 e1 x^2 - e2 x^2 + e2^2 x^2 - f1 x^2 + e2 f1 x^2 + \\ e1 f2 x^2 - e1 y + e1^2 y + e1 e2 y - x y + e1 x y + e2 x y - x^2 y + e1 x^2 y + e2 x^2 y);$$

$$\mathbf{qq} = -\frac{1}{-1 + e1 + e2} (d2 e1 x - e2 x - d2 e2 x + 2 e2^2 x - f1 x + 2 e2 f1 x - f2 x + \\ 2 e1 f2 x + d2 e1 x^2 - e2 x^2 + e2^2 x^2 - f1 x^2 + e2 f1 x^2 + e1 f2 x^2 - \\ e2 y + e1 e2 y + e2^2 y - x y + e1 x y + e2 x y - x^2 y + e1 x^2 y + e2 x^2 y);$$

## Program

```

In[ ]:= Ser[s_] := Plus@@Table[x^i y^{s-i} p[i, s-i], {i, 0, s}];
Hom[s_] := Table[p[s-i, i], {i, 0, s}];
hh = Sum[Ser[i], {i, 2, 6}]; (*9*)
Lie = D[hh, x] pp + D[hh, y] qq // Expand;
RHS = g1 (x^2 + y^2)^2 + g2 (x^2 + y^2)^3 + g3 (x^2 + y^2)^4 // Expand;
vv = Lie - RHS // Expand;
CoefPol[f_, s_] :=
  Module[{m, lis, t}, lis = {}; m = Expand[f]; Do[Do[If[i+j == s, lis = AppendTo[lis,
    Coefficient[m, x^i y^j] /. {x -> 0, y -> 0, z -> 0}], {i, 0, s}], {j, 0, s}];
  lis[s] = lis];
Do[CoefPol[vv, i], {i, 1, 9}];

```

## Degree 1, 2

```

In[ ]:= ls[1]
ls[2] // Factor;
sol2 = Solve[ls[2] == 0, Hom[2]] // Simplify;
{p[2, 0], p[1, 1], p[0, 2]} = {p[2, 0], p[1, 1], p[0, 2]} /. sol2[[1]];
ls[2] // Simplify

```

Out[ ]:= {0, 0}

... Solve: Equations may not give solutions for all "solve" variables.

Out[ ]:= {0, 0, 0}

## Quadratic form

```

In[ ]:= ClearAll[qv, mat, a11, det, eg];
qv = Ser[2] // FullSimplify
mat = 1/2 D[qv, {{x, y}, 2}];
mat // MatrixForm
a11 = mat[[1, 1]]
det = Det[mat] // Factor
eg = Eigenvalues[mat] // Simplify // Factor;

```

$$\text{Out[ ]:= } \frac{1}{2} \left( \frac{(d2 (e1 - e2) + (-1 + 2 e2) (e2 + f1) + (-1 + 2 e1) f2) x^2}{e2 (-1 + e1 + e2)} + 2 x y + \frac{e1 y^2}{e2} \right) p[1, 1]$$

Out[ ]//MatrixForm=

$$\left( \begin{array}{cc} \frac{(d2 (e1 - e2) + (-1 + 2 e2) (e2 + f1) + (-1 + 2 e1) f2) p[1, 1]}{2 e2 (-1 + e1 + e2)} & \frac{1}{2} p[1, 1] \\ \frac{1}{2} p[1, 1] & \frac{e1 p[1, 1]}{2 e2} \end{array} \right)$$

$$\text{Out[ ]:= } \frac{(d2 (e1 - e2) + (-1 + 2 e2) (e2 + f1) + (-1 + 2 e1) f2) p[1, 1]}{2 e2 (-1 + e1 + e2)}$$

$$\text{Out[ ]:= } \frac{(d2 e1^2 - e1 e2 - d2 e1 e2 + e2^2 + e1 e2^2 - e2^3 - e1 f1 + 2 e1 e2 f1 - e1 f2 + 2 e1^2 f2) p[1, 1]^2}{4 e2^2 (-1 + e1 + e2)}$$

## Conditions for a positive definite quadratic form

$$\begin{aligned} \text{In}[^]= \mathbf{d1} &= \frac{\mathbf{c1} (\mathbf{e1} - \mathbf{e2}) + \mathbf{e2} \mathbf{f1} + \mathbf{e1} (\mathbf{d2} + \mathbf{f2})}{\mathbf{e2}}; \mathbf{y0} = \frac{\mathbf{c1} + \mathbf{d2} + \mathbf{f2}}{\mathbf{e2}}; \\ \mathbf{c1} &= \frac{\mathbf{d2} - \mathbf{d2} \mathbf{e1} - \mathbf{e2} (\mathbf{e2} + \mathbf{f1}) + \mathbf{f2} - \mathbf{e1} \mathbf{f2}}{-1 + \mathbf{e1} + \mathbf{e2}}; \\ \mathbf{beta} &= \\ &= \frac{1}{-1 + \mathbf{e1} + \mathbf{e2}} (\mathbf{d2} \mathbf{e1}^2 - \mathbf{e1} \mathbf{e2} - \mathbf{d2} \mathbf{e1} \mathbf{e2} + \mathbf{e2}^2 + \mathbf{e1} \mathbf{e2}^2 - \mathbf{e2}^3 - \mathbf{e1} \mathbf{f1} + 2 \mathbf{e1} \mathbf{e2} \mathbf{f1} - \mathbf{e1} \mathbf{f2} + 2 \mathbf{e1}^2 \mathbf{f2}); \end{aligned}$$

`In[^]= Reduce[ a11 > 0 && det > 0 && beta > 0 && y0 > 0 && c1 > 0 && d1 > 0 && d2 > 0 && e1 > 0 && e2 > 0 && f1 > 0 && f2 > 0, {d2, e1, e2, f1, f2} ] // FullSimplify`

`Out[^]= $Aborted`

## Setting f1 and f2

`In[^]= ClearAll[f1, f2];`

$$\mathbf{p}[1, 1] = 1; \mathbf{f1} = \frac{1}{2}; \mathbf{f2} = \frac{1}{10};$$

`In[^]= Reduce[ a11 > 0 && det > 0 && beta > 0 && y0 > 0 && c1 > 0 && d1 > 0 && d2 > 0 && e1 > 0 && e2 > 0, {d2, e1, e2} ] // FullSimplify`

`Out[^]=` 
$$\left( \mathbf{e1} + \mathbf{e2} > 1 \ \&\& \right. \\ \left( \left( \mathbf{e1} < 1 \ \&\& \sqrt{5} \sqrt{13 - 80 \mathbf{d2} (-1 + \mathbf{e1}) - 8 \mathbf{e1}} > 5 + 20 \mathbf{e2} \ \&\& \left( (80 \mathbf{d2} > 51 + 3 \sqrt{465} \ \&\& \mathbf{e1} \geq \right. \right. \right. \\ \left. \left. \left. \text{Root}[-2 - 40 \mathbf{d2} - 200 \mathbf{d2}^2 + (61 + 330 \mathbf{d2} + 200 \mathbf{d2}^2) \#1 + (-16 + 10 \mathbf{d2}) \#1^2 + 2 \#1^3 \ \&\& , \right. \right. \right. \\ \left. \left. \left. 1 \right) \right) \right) \ \&\& \left( 10 \mathbf{d2} \leq 9 \ \&\& 5 \mathbf{d2} > 2 \ \&\& \mathbf{d2} + \mathbf{e1} > \frac{7}{5} \right) \ \&\& \\ \left( 80 \mathbf{d2} \leq 51 + 3 \sqrt{465} \ \&\& 10 \mathbf{d2} > 9 \ \&\& 2 \mathbf{e1} \geq 1 \right) \right) \ \&\& \\ \left( \mathbf{e1} < \text{Root}[-2 - 40 \mathbf{d2} - 200 \mathbf{d2}^2 + (61 + 330 \mathbf{d2} + 200 \mathbf{d2}^2) \#1 + (-16 + 10 \mathbf{d2}) \#1^2 + 2 \#1^3 \ \&\& , \right. \\ \left. 1 \right) \ \&\& \left( \mathbf{e2} < \text{Root}[3 \mathbf{e1} - \mathbf{e1}^2 - 5 \mathbf{d2} \mathbf{e1}^2 + 5 \mathbf{d2} \mathbf{e1} \#1 + (-5 - 5 \mathbf{e1}) \#1^2 + 5 \#1^3 \ \&\& , 1] \ \&\& \right. \\ \left( 2 \mathbf{e1} > 1 \ \&\& 2 \mathbf{d2} \geq 3 \right) \ \&\& \left( \mathbf{d2} > \sqrt{1.46\dots} \ \&\& \mathbf{e1} > \right. \\ \left. \text{Root}[-60 + (83 + 370 \mathbf{d2} - 25 \mathbf{d2}^2) \#1 + (-282 - 330 \mathbf{d2} - 500 \mathbf{d2}^2 + 100 \mathbf{d2}^3) \#1^2 + \right. \\ \left. (27 + 480 \mathbf{d2} + 200 \mathbf{d2}^2) \#1^3 + (20 + 100 \mathbf{d2}) \#1^4 \ \&\& , 4] \ \&\& 2 \mathbf{d2} < 3 \right) \right) \ \&\& \\ \left( \mathbf{d2} \leq \sqrt{1.46\dots} \ \&\& 80 \mathbf{d2} > 51 + 3 \sqrt{465} \ \&\& 2 \mathbf{e1} \geq 1 \ \&\& \mathbf{e2} < \text{Root}[ \right. \\ \left. 3 \mathbf{e1} - \mathbf{e1}^2 - 5 \mathbf{d2} \mathbf{e1}^2 + 5 \mathbf{d2} \mathbf{e1} \#1 + (-5 - 5 \mathbf{e1}) \#1^2 + 5 \#1^3 \ \&\& , 3] \right) \right) \ \&\& \\ \left( 2 \mathbf{d2} < 3 \ \&\& \mathbf{d2} > \sqrt{1.46\dots} \ \&\& 2 \mathbf{e1} \geq 1 \ \&\& \mathbf{e2} < \text{Root}[3 \mathbf{e1} - \mathbf{e1}^2 - 5 \mathbf{d2} \mathbf{e1}^2 + \right. \\ \left. 5 \mathbf{d2} \mathbf{e1} \#1 + (-5 - 5 \mathbf{e1}) \#1^2 + 5 \#1^3 \ \&\& , 3] \ \&\& \right. \\ \left. \mathbf{e1} \leq \text{Root}[-60 + (83 + 370 \mathbf{d2} - 25 \mathbf{d2}^2) \#1 + (-282 - 330 \mathbf{d2} - 500 \mathbf{d2}^2 + 100 \mathbf{d2}^3) \#1^2 + \right. \\ \left. (27 + 480 \mathbf{d2} + 200 \mathbf{d2}^2) \#1^3 + (20 + 100 \mathbf{d2}) \#1^4 \ \&\& , 4] \right) \right) \ \&\& \\ \left( \mathbf{e2} > \text{Root}[3 \mathbf{e1} - \mathbf{e1}^2 - 5 \mathbf{d2} \mathbf{e1}^2 + 5 \mathbf{d2} \mathbf{e1} \#1 + (-5 - 5 \mathbf{e1}) \#1^2 + 5 \#1^3 \ \&\& , \right. \end{aligned}$$

$$\begin{aligned}
& 2] \&\& \\
& \left( \left( e1 > \text{Root}[-60 + (83 + 370 d2 - 25 d2^2) \#1 + (-282 - 330 d2 - 500 d2^2 + 100 d2^3) \#1^2 + \right. \right. \\
& \quad \left. \left. (27 + 480 d2 + 200 d2^2) \#1^3 + (20 + 100 d2) \#1^4 \&\&, 3] \&\& \right. \right. \\
& \quad e2 < \text{Root}[3 e1 - e1^2 - 5 d2 e1^2 + 5 d2 e1 \#1 + (-5 - 5 e1) \#1^2 + 5 \#1^3 \&\&, 3] \&\& \\
& \quad \left( (80 d2 \geq 51 + 3 \sqrt{465} \&\& 2 d2 < 3 \&\& 2 e1 < 1) \mid \mid \right. \\
& \quad \left( 20 d2 > \sqrt{27.2\dots} \&\& 80 d2 < 51 + 3 \sqrt{465} \&\& e1 < \text{Root}[-2 - 40 d2 - 200 \right. \\
& \quad \quad \left. d2^2 + (61 + 330 d2 + 200 d2^2) \#1 + (-16 + 10 d2) \#1^2 + 2 \#1^3 \&\&, 1] \right) \mid \mid \left. \right) \mid \mid \\
& \left( \sqrt{5} \sqrt{13 - 80 d2 (-1 + e1) - 8 e1} > 5 + 20 e2 \&\& 2 e1 < 1 \&\& \left( (20 d2 > \sqrt{27.2\dots} \&\& e1 \geq \right. \right. \\
& \quad \left. \left. \text{Root}[-2 - 40 d2 - 200 d2^2 + (61 + 330 d2 + 200 d2^2) \#1 + (-16 + 10 d2) \#1^2 + 2 \#1^3 \&\&, \right. \right. \\
& \quad \left. \left. 1] \&\& 80 d2 < 51 + 3 \sqrt{465} \right) \mid \mid \left( 10 d2 > 9 \&\& d2 + e1 > \frac{7}{5} \&\& 160 d2 \leq 69 + 5 \sqrt{321} \right) \mid \mid \right. \\
& \quad \left( 160 d2 > 69 + 5 \sqrt{321} \&\& e1 > \text{Root}[-2 - 40 d2 - 200 d2^2 + (61 + 330 d2 + 200 d2^2) \right. \\
& \quad \quad \left. \#1 + (-16 + 10 d2) \#1^2 + 2 \#1^3 \&\&, 1] \&\& 20 d2 \leq \sqrt{27.2\dots} \right) \mid \mid \left. \right) \mid \mid \\
& \left( \sqrt{5} \sqrt{13 - 80 d2 (-1 + e1) - 8 e1} < 5 + 20 e2 \&\& \right. \\
& \quad \left( \left( e1 > \text{Root}[-2 - 40 d2 - 200 d2^2 + (61 + 330 d2 + 200 d2^2) \#1 + (-16 + 10 d2) \#1^2 + 2 \#1^3 \&\&, 1] \&\& \right. \right. \\
& \quad \quad e2 < \text{Root}[3 e1 - e1^2 - 5 d2 e1^2 + 5 d2 e1 \#1 + (-5 - 5 e1) \#1^2 + 5 \#1^3 \&\&, 2] \&\& \\
& \quad \quad \left( \left( d2 + e1 < \frac{7}{5} \&\& \right. \right. \\
& \quad \quad \quad \left. \left. (5 d2 > 2 \&\& e1 + e2 < 1 \&\& 10 d2 \leq 9) \mid \mid (10 d2 > 9 \&\& 160 d2 < 69 + 5 \sqrt{321}) \right) \mid \mid \right. \\
& \quad \quad \left( d2 > 0 \&\& \sqrt{3} + 2 d2 < \frac{9}{5} \&\& 2 e1 \leq 1 \right) \mid \mid \left( \sqrt{3} + 2 d2 \geq \frac{9}{5} \&\& 2 e1 < 1 \&\& 10 d2 \leq 9 \right) \mid \mid \left. \right) \mid \mid \\
& \quad \left( e1 + e2 < 1 \&\& \left( \left( e1 < 1 \&\& \left( \left( d2 > 0 \&\& 2 e1 > 1 \&\& \sqrt{3} + 2 d2 < \frac{9}{5} \right) \mid \mid \left( \sqrt{3} + 2 d2 \geq \right. \right. \right. \right. \\
& \quad \quad \left. \left. \left. \frac{9}{5} \&\& 2 e1 \geq 1 \&\& 5 d2 \leq 2 \right) \right) \mid \mid \left( 5 d2 > 2 \&\& 2 e1 \geq 1 \&\& d2 + e1 < \frac{7}{5} \right) \right) \right) \right) \mid \mid \left. \right) \mid \mid \left. \right) \mid \mid
\end{aligned}$$

## Degree 3

```

In[ ]:= ls[3] // Factor;
sol3 = Solve[ls[3] == 0, Hom[3]] // Simplify;
{p[3, 0], p[2, 1], p[1, 2], p[0, 3]} =
  {p[3, 0], p[2, 1], p[1, 2], p[0, 3]} /. sol3[[1]] // Factor;
ls[3] // Simplify
Out[ ]:= {0, 0, 0, 0}

```



## Degree 4

```
In[ ]:= ls[4] // Factor;
sol4 = Solve[ls[4] == 0, AppendTo[Hom[4], g1]];
{g1, p[4, 0], p[3, 1], p[2, 2], p[1, 3], p[0, 4]} =
  {g1, p[4, 0], p[3, 1], p[2, 2], p[1, 3], p[0, 4]} /. sol4[[1]];
g1 //
Factor
```

... Solve: Equations may not give solutions for all "solve" variables.

```
Out[ ]:= (-15 e1 - 22 e1^2 + 55 d2 e1^2 + 19 e1^3 + 85 d2 e1^3 - 50 d2^2 e1^3 - 6 e1^4 - 20 d2 e1^4 - 100 d2^2 e1^4 +
  30 e2 - 90 e1 e2 - 75 d2 e1 e2 + 105 e1^2 e2 - 70 d2 e1^2 e2 + 50 d2^2 e1^2 e2 - 79 e1^3 e2 +
  170 d2 e1^3 e2 + 100 d2^2 e1^3 e2 - 80 e2^2 + 50 d2 e2^2 + 410 e1 e2^2 - 25 d2 e1 e2^2 - 200 e1^2 e2^2 -
  200 d2 e1^2 e2^2 - 20 e1^3 e2^2 - 200 d2 e1^3 e2^2 - 50 d2 e2^3 - 185 e1 e2^3 + 50 d2 e1 e2^3 +
  170 e1^2 e2^3 + 200 d2 e1^2 e2^3 + 50 e2^4 - 150 e1 e2^4 - 100 e1^2 e2^4 + 100 e1 e2^5) /
  (2 e2 (27 + 12 e1 - 90 d2 e1 + 38 e1^2 - 20 d2 e1^2 + 75 d2^2 e1^2 - 140 e1^3 + 50 d2 e1^3 + 75 e1^4 +
  90 d2 e2 - 30 e1 e2 + 20 d2 e1 e2 - 150 d2^2 e1 e2 - 140 e1^2 e2 + 150 e1^3 e2 - 80 e2^2 + 75 d2^2 e2^2 -
  240 e1 e2^2 + 250 d2 e1 e2^2 + 275 e1^2 e2^2 - 200 e2^3 - 300 d2 e2^3 + 300 e1 e2^3 + 400 e2^4))
```

```
In[ ]:= Variables[g1]
```

```
Out[ ]:= {e2, e1, d2}
```

## Degree 5

```
In[ ]:= ls[5] // Factor;
sol5 = Solve[ls[5] == 0, Hom[5]];
{p[5, 0], p[4, 1], p[3, 2], p[2, 3], p[1, 4], p[0, 5]} =
  {p[5, 0], p[4, 1], p[3, 2], p[2, 3], p[1, 4], p[0, 5]} /. sol5[[1]] // Factor;
ls[5] // Factor
```

```
Out[ ]:= {0, 0, 0, 0, 0, 0}
```

## Degree 6

```
In[ ]:= ls[6] // Factor;
sol6 = Solve[ls[6] == 0, AppendTo[Hom[6], g2]];
{p[6, 0], p[5, 1], p[4, 2], p[3, 3], p[2, 4], p[1, 5], p[0, 6], g2} =
  {p[6, 0], p[5, 1], p[4, 2], p[3, 3], p[2, 4], p[1, 5], p[0, 6], g2} /. sol6[[1]] // Factor;
```

... Solve: Equations may not give solutions for all "solve" variables.

In[ ]:= **g2**

**Variables[g2]**

Out[ ]:= 
$$\frac{(-218700 e_1^3 + 967140 e_1^4 + 2624400 d_2 e_1^4 + \dots 2922 \dots + 900000000 d_2 e_1 e_2^{19} p[2, 2] + 2700000000 e_1^2 e_2^{19} p[2, 2] - 1200000000 e_1 e_2^{20} p[2, 2])}{(120 e_2 \dots 3 \dots (\dots 1 \dots) (27 + 12 e_1 - 90 d_2 e_1 + 38 e_1^2 - 20 d_2 e_1^2 + 75 d_2^2 e_1^2 - 140 e_1^3 + \dots 16 \dots + 250 d_2 e_1 e_2^2 + 275 e_1^2 e_2^2 - 200 e_2^3 - 300 d_2 e_2^3 + 300 e_1 e_2^3 + 400 e_2^4))}$$

large output    **show less**    **show more**    **show all**    **set size limit...**

Out[ ]:= {e2, e1, d2, p[2, 2]}

In[ ]:= **p[2, 2] = 0;**

**g2;**

In[ ]:= **Variables[g2]**

Out[ ]:= {e2, e1, d2}

## Investigating the possible values of e1 and d2

In[ ]:= **ClearAll[d2, e1, e2]; e1 =  $\frac{1}{10}$ ;**

**Reduce[ g1 == 0 && g2 < 0 && a11 > 0 && det > 0 && beta > 0 && y0 > 0 && c1 > 0 && d1 > 0 && d2 > 0 && e2 > 0, {d2, e2} ] // FullSimplify**  
**Reduce[ g1 == 0 && g2 > 0 && a11 > 0 && det > 0 && beta > 0 && y0 > 0 && c1 > 0 && d1 > 0 && d2 > 0 && e2 > 0, {d2, e2} ] // FullSimplify**  
**Reduce[ g1 == 0 && g2 == 0 && a11 > 0 && det > 0 && beta > 0 && y0 > 0 && c1 > 0 && d1 > 0 && d2 > 0 && e2 > 0, {d2, e2} ] // FullSimplify**

Out[ ]:= False

Out[ ]:= False

Out[ ]:= False

In[ ]:= **ClearAll[d2, e1, e2]; e1 =  $\frac{2}{10}$ ;**

**Reduce[ g1 == 0 && g2 < 0 && a11 > 0 && det > 0 && beta > 0 && y0 > 0 && c1 > 0 && d1 > 0 && d2 > 0 && e2 > 0, {d2, e2} ] // FullSimplify**  
**Reduce[ g1 == 0 && g2 > 0 && a11 > 0 && det > 0 && beta > 0 && y0 > 0 && c1 > 0 && d1 > 0 && d2 > 0 && e2 > 0, {d2, e2} ] // FullSimplify**  
**Reduce[ g1 == 0 && g2 == 0 && a11 > 0 && det > 0 && beta > 0 && y0 > 0 && c1 > 0 && d1 > 0 && d2 > 0 && e2 > 0, {d2, e2} ] // FullSimplify**

Out[ ]:= False

Out[ ]:=  $0 < d2 < \sqrt{0.253\dots} \&\&$

$e_2 == \text{Root}[-2336 + 1780 d_2 - 350 d_2^2 + (9730 - 10275 d_2 + 1750 d_2^2) \#1 + (-3850 + 22125 d_2) \#1^2 + (-18875 - 20000 d_2) \#1^3 + 10000 \#1^4 + 12500 \#1^5 \&, 3]$

Out[ ]:= False

```

In[ ]:= ClearAll[d2, e1, e2]; e1 =  $\frac{3}{10}$ ;
Reduce[ g1 == 0 && g2 < 0 && a11 > 0 && det > 0 && beta > 0 &&
  y0 > 0 && c1 > 0 && d1 > 0 && d2 > 0 && e2 > 0, {d2, e2} ] // FullSimplify
Reduce[ g1 == 0 && g2 > 0 && a11 > 0 && det > 0 && beta > 0 && y0 > 0 &&
  c1 > 0 && d1 > 0 && d2 > 0 && e2 > 0, {d2, e2} ] // FullSimplify
Reduce[ g1 == 0 && g2 == 0 && a11 > 0 && det > 0 && beta > 0 && y0 > 0 &&
  c1 > 0 && d1 > 0 && d2 > 0 && e2 > 0, {d2, e2} ] // FullSimplify
Out[ ]:= d2 > 0 && 47  $\sqrt{265}$  + 1200 d2 < 1259 &&
  e2 == Root[ -30 078 + 35 415 d2 - 10 800 d22 + (51 585 - 121 050 d2 + 36 000 d22) #1 +
    (122 300 + 95 500 d2) #12 + (-201 000 - 85 000 d2) #13 - 20 000 #14 + 150 000 #15 &, 3 ]
Out[ ]:= False
Out[ ]:= False

```

## Setting the value of d2

```

In[ ]:= ClearAll[d2, e1, e2]; d2 = 1 / 100;
Reduce[ g1 == 0 && g2 < 0 && a11 > 0 && det > 0 && beta > 0 &&
  y0 > 0 && c1 > 0 && d1 > 0 && e1 ≥ 0 && e2 > 0, {e1, e2} ] // FullSimplify
Reduce[ g1 == 0 && g2 > 0 && a11 > 0 && det > 0 && beta > 0 && y0 > 0 &&
  c1 > 0 && d1 > 0 && e1 ≥ 0 && e2 > 0, {e1, e2} ] // FullSimplify
Reduce[ g1 == 0 && g2 == 0 && a11 > 0 && det > 0 && beta > 0 && y0 > 0 &&
  c1 > 0 && d1 > 0 && e1 ≥ 0 && e2 > 0, {e1, e2} ] // FullSimplify
Out[ ]:= e2 ==
  Root[ -3000 e1 - 4290 e12 + 3969 e13 - 1242 e14 + (6000 - 18 150 e1 + 20 861 e12 - 15 458 e13) #1 +
    (-15 900 + 81 950 e1 - 40 400 e12 - 4400 e13) #12 + (-100 - 36 900 e1 + 34 400 e12) #13 +
    (10 000 - 30 000 e1 - 20 000 e12) #14 + 20 000 e1 #15 &, 3 ] &&
  (  < e1 <  $\frac{1}{2}$  ||  < e1 <  )
Out[ ]:=  < e1 <  && e2 ==
  Root[ -3000 e1 - 4290 e12 + 3969 e13 - 1242 e14 + (6000 - 18 150 e1 + 20 861 e12 - 15 458 e13) #1 +
    (-15 900 + 81 950 e1 - 40 400 e12 - 4400 e13) #12 + (-100 - 36 900 e1 + 34 400 e12) #13 +
    (10 000 - 30 000 e1 - 20 000 e12) #14 + 20 000 e1 #15 &, 3 ]
Out[ ]:= e1 ==  && e2 +  == 0

```

## Setting the value of e1, d2 such that g1=0, g2>0

```
In[*]:= ClearAll[d2, e1, e2]; e1 =  $\frac{18}{100}$ ; d2 =  $\frac{1}{100}$ ;
Reduce[g1 == 0 && g2 < 0 && a11 > 0 && det > 0 &&
beta > 0 && y0 > 0 && c1 > 0 && d1 > 0 && e2 > 0, {e2}] // FullSimplify
Reduce[g1 == 0 && g2 > 0 && a11 > 0 && det > 0 && beta > 0 && y0 > 0 && c1 > 0 && d1 > 0 && e2 > 0,
{e2}] // FullSimplify
Reduce[g1 == 0 && g2 == 0 && a11 > 0 && det > 0 && beta > 0 && y0 > 0 && c1 > 0 && d1 > 0 && e2 > 0,
{e2}] // FullSimplify
```

Out[\*]= False

Out[\*]=  $900 e2 ==$

Out[\*]= False

```
In[*]:= g1 // Factor
```

```
Out[*]= (4 (-256700232 + 1296384900 e2 -
970164375 e22 - 2198218750 e23 + 1543750000 e24 + 1406250000 e25)) /
(625 e2 (29488131 - 8127900 e2 - 113832500 e22 - 149000000 e23 + 400000000 e24))
```

```
In[*]:= g2 // Factor
```

```
Out[*]= - ( (2 (-2134161091674039218421625601149503 + 140355978576685509466108656363508650
e2 - 1754283565687266330660162078035242500 e22 +
8737367532700018023712655697839625000 e23 -
21589750138203633706431942941437500000 e24 +
7510407838142230503882348527250000000 e25 -
513431090081409858991186790953125000000 e26 +
2056162232816920023362338942968750000000 e27 -
3838597863908140206223129570312500000000 e28 +
1617903538459282225849587890625000000000 e29 +
461531032565910486069257812500000000000 e210 -
1399763372530238358330078125000000000000 e211 -
2008655532434848679589843750000000000000 e212 +
4065298628885574311523437500000000000000 e213 -
4191171782762900390625000000000000000000 e214 +
3746586177018969726562500000000000000000 e215 -
3751362881977539062500000000000000000000 e216 +
2905754302490234375000000000000000000000 e217 -
1211387548828125000000000000000000000000 e218 +
1593969726562500000000000000000000000000 e219 +
2636718750000000000000000000000000000000 e220)) /
(1875 e2 (-3549 + 850 e2 + 10000 e22) (25299 + 450 e2 - 295000 e22 + 250000 e23)2
(-25299 - 450 e2 - 320000 e22 + 500000 e23)
(29488131 - 8127900 e2 - 113832500 e22 - 149000000 e23 + 400000000 e24)
(38082789 - 250500 e2 - 60467500 e22 - 515000000 e23 + 800000000 e24)) )
```

```
In[*]:= e2 = ;  
          e2 // N  
Out[*]= 0.29582
```

---

## Perturbation

1. Setting  $e2$  such that  $g1 = 0$ ,  $g2 > 0$ ,  $\text{trace}(J) = 0$

```
In[*]:= Quit
```

```

In[ ]:= ClearAll[xd, yd, c1, d1, d2, e1, e2, f1, f2, g1, g2, sol];
xd = x^2 y - x y - c1 x^2 - d1 x + e1 y + f1;
yd = -x^2 y + x y + c1 x^2 + d2 x - e2 y + f2;
f1 = 1/2; f2 = 1/10;
e1 = 18/100; d2 = 1/100;
d1 = (c1 (e1 - e2) + e2 f1 + e1 (d2 + f2))/e2;
c1 = (d2 - d2 e1 - e2 (e2 + f1) + f2 - e1 f2)/(-1 + e1 + e2);
e2 = 266..../900;
g1 = (4 (-256 700 232 + 1 296 384 900 e2 -
970 164 375 e2^2 - 2 198 218 750 e2^3 + 1 543 750 000 e2^4 + 1 406 250 000 e2^5)) /
(625 e2 (29 488 131 - 8 127 900 e2 - 113 832 500 e2^2 - 149 000 000 e2^3 + 400 000 000 e2^4));
g2 = -((2 (-2 134 161 091 674 039 218 421 625 601 149 503 +
140 355 978 576 685 509 466 108 656 363 508 650 e2 -
1 754 283 565 687 266 330 660 162 078 035 242 500 e2^2 +
8 737 367 532 700 018 023 712 655 697 839 625 000 e2^3 -
21 589 750 138 203 633 706 431 942 941 437 500 000 e2^4 +
75 104 078 381 422 305 038 823 485 272 500 000 000 e2^5 -
513 431 090 081 409 858 991 186 790 953 125 000 000 e2^6 +
2 056 162 232 816 920 023 362 338 942 968 750 000 000 e2^7 -
3 838 597 863 908 140 206 223 129 570 312 500 000 000 e2^8 +
1 617 903 538 459 282 225 849 587 890 625 000 000 000 e2^9 +
4 615 310 325 659 104 860 692 578 125 000 000 000 000 e2^10 -
1 399 763 372 530 238 358 330 078 125 000 000 000 000 e2^11 -
20 086 555 324 348 486 795 898 437 500 000 000 000 000 e2^12 +
40 652 986 288 855 743 115 234 375 000 000 000 000 000 e2^13 -
41 911 717 827 629 003 906 250 000 000 000 000 000 000 e2^14 +
37 465 861 770 189 697 265 625 000 000 000 000 000 000 e2^15 -
37 513 628 819 775 390 625 000 000 000 000 000 000 000 e2^16 +
29 057 543 024 902 343 750 000 000 000 000 000 000 000 e2^17 -
12 113 875 488 281 250 000 000 000 000 000 000 000 000 e2^18 +
1 593 969 726 562 500 000 000 000 000 000 000 000 000 e2^19 +
263 671 875 000 000 000 000 000 000 000 000 000 000 e2^20)) /
(1875 e2 (-3549 + 850 e2 + 10 000 e2^2) (25 299 + 450 e2 - 295 000 e2^2 + 250 000 e2^3)^2
(-25 299 - 450 e2 - 320 000 e2^2 + 500 000 e2^3)
(29 488 131 - 8 127 900 e2 - 113 832 500 e2^2 - 149 000 000 e2^3 + 400 000 000 e2^4)
(38 082 789 - 250 500 e2 - 60 467 500 e2^2 - 515 000 000 e2^3 + 800 000 000 e2^4));
{c1, d1, e2} // N
{g1, g2} // N
Out[ ]:= {0.277042, 0.458465, 0.29582}

```

```
Out[6]=  $\{-1.97438 \times 10^{-17}, 0.0276312\}$ 
```

```
In[6]:= Solve[{xd == 0, yd == 0}, {x, y}, Reals] // N
```

```
Out[6]= {{x -> 0.457223, y -> 3.41004}, {x -> 0.809127, y -> 2.04744}, {x -> 1., y -> 1.30837}}
```

```
In[6]:= ClearAll[sol];
```

```
sol = Solve[{xd == 0, yd == 0}, {x, y}, Reals] [[3]] // N
```

```
D[{xd, yd}, {{x, y}}] /. sol;
```

```
Eigenvalues[D[{xd, yd}, {{x, y}}] /. sol] // N
```

```
Out[6]= {x -> 1., y -> 1.30837}
```

```
Out[6]=  $\{-8.67362 \times 10^{-18} + 0.21555 i, -8.67362 \times 10^{-18} - 0.21555 i\}$ 
```

## 2. Perturbing e2 such that $g1 < 0$ , $g2 > 0$ , $\text{trace}(J) = 0$

```
In[6]:= Quit
```

```

In[ ]:= ClearAll[xd, yd, c1, d1, d2, e1, e2, f1, f2, g1, g2, sol];
xd = x^2 y - x y - c1 x^2 - d1 x + e1 y + f1;
yd = -x^2 y + x y + c1 x^2 + d2 x - e2 y + f2;
f1 = 1/2; f2 = 1/10;
e1 = 18/100; d2 = 1/100;
d1 = (c1 (e1 - e2) + e2 f1 + e1 (d2 + f2))/e2;
c1 = (d2 - d2 e1 - e2 (e2 + f1) + f2 - e1 f2)/(-1 + e1 + e2);
e2 = 278/1000; (*perturbed parameter for g1<0*)
g1 = (4 (-256 700 232 + 1 296 384 900 e2 -
970 164 375 e2^2 - 2 198 218 750 e2^3 + 1 543 750 000 e2^4 + 1 406 250 000 e2^5)) /
(625 e2 (29 488 131 - 8 127 900 e2 - 113 832 500 e2^2 - 149 000 000 e2^3 + 400 000 000 e2^4));
g2 = - ( (2 (-2 134 161 091 674 039 218 421 625 601 149 503 +
140 355 978 576 685 509 466 108 656 363 508 650 e2 -
1 754 283 565 687 266 330 660 162 078 035 242 500 e2^2 +
8 737 367 532 700 018 023 712 655 697 839 625 000 e2^3 -
21 589 750 138 203 633 706 431 942 941 437 500 000 e2^4 +
75 104 078 381 422 305 038 823 485 272 500 000 000 e2^5 -
513 431 090 081 409 858 991 186 790 953 125 000 000 e2^6 +
2 056 162 232 816 920 023 362 338 942 968 750 000 000 e2^7 -
3 838 597 863 908 140 206 223 129 570 312 500 000 000 e2^8 +
1 617 903 538 459 282 225 849 587 890 625 000 000 000 e2^9 +
4 615 310 325 659 104 860 692 578 125 000 000 000 000 e2^10 -
1 399 763 372 530 238 358 330 078 125 000 000 000 000 e2^11 -
20 086 555 324 348 486 795 898 437 500 000 000 000 000 e2^12 +
40 652 986 288 855 743 115 234 375 000 000 000 000 000 e2^13 -
41 911 717 827 629 003 906 250 000 000 000 000 000 000 e2^14 +
37 465 861 770 189 697 265 625 000 000 000 000 000 000 e2^15 -
37 513 628 819 775 390 625 000 000 000 000 000 000 000 e2^16 +
29 057 543 024 902 343 750 000 000 000 000 000 000 000 e2^17 -
12 113 875 488 281 250 000 000 000 000 000 000 000 000 e2^18 +
1 593 969 726 562 500 000 000 000 000 000 000 000 000 e2^19 +
263 671 875 000 000 000 000 000 000 000 000 000 000 e2^20)) /
(1875 e2 (-3549 + 850 e2 + 10 000 e2^2) (25 299 + 450 e2 - 295 000 e2^2 + 250 000 e2^3)^2
(-25 299 - 450 e2 - 320 000 e2^2 + 500 000 e2^3)
(29 488 131 - 8 127 900 e2 - 113 832 500 e2^2 - 149 000 000 e2^3 + 400 000 000 e2^4)
(38 082 789 - 250 500 e2 - 60 467 500 e2^2 - 515 000 000 e2^3 + 800 000 000 e2^4));
{c1, d1}
{c1, d1} // N
{g1, g2} // N

```



$$\text{Out}[^*]= \left\{ \frac{31521}{135500}, \frac{66289}{135500} \right\}$$

$$\text{Out}[^*]= \{0.232627, 0.489218\}$$

$$\text{Out}[^*]= \{-0.0090896, 0.0400065\}$$

```
In[^*]:= sol = Solve[{xd == 0, yd == 0}, {x, y}, Reals] // N
```

```
Out[^*]= {{x -> 1., y -> 1.23247}, {x -> 0.414968, y -> 4.09327}, {x -> 0.7895, y -> 2.26181}}
```

```
In[^*]:= ClearAll[sol];
```

```
sol = Solve[{xd == 0, yd == 0}, {x, y}, Reals][[1]] // N
```

```
D[{xd, yd}, {{x, y}}] /. sol;
```

```
Eigenvalues[D[{xd, yd}, {{x, y}}] /. sol] // N
```

```
Out[^*]= {x -> 1., y -> 1.23247}
```

```
Out[^*]= {-3.81639 × 10-17 + 0.24293 i, -3.81639 × 10-17 - 0.24293 i}
```

### 3. Perturbing c1 and e2 such that $g1 < 0$ , $g2 > 0$ , $\text{trace}(J) > 0$

```
In[^*]:= Quit
```

```

In[ ]:= ClearAll[xd, yd, c1, d1, d2, e1, e2, f1, f2, g1, g2, sol];
xd = x^2 y - x y - c1 x^2 - d1 x + e1 y + f1;
yd = -x^2 y + x y + c1 x^2 + d2 x - e2 y + f2;
f1 =  $\frac{1}{2}$ ; f2 =  $\frac{1}{10}$ ;
e1 =  $\frac{18}{100}$ ; d2 =  $\frac{1}{100}$ ;
d1 =  $\frac{c1 (e1 - e2) + e2 f1 + e1 (d2 + f2)}{e2}$ ;
c1 =  $\frac{233}{1000}$ ; (*perturbed parameter for trace(J)>0*)
e2 =  $\frac{278}{1000}$ ; (*perturbed parameter for g1<0*)
g1 = (4 (-256 700 232 + 1 296 384 900 e2 -
970 164 375 e2^2 - 2 198 218 750 e2^3 + 1 543 750 000 e2^4 + 1 406 250 000 e2^5)) /
(625 e2 (29 488 131 - 8 127 900 e2 - 113 832 500 e2^2 - 149 000 000 e2^3 + 400 000 000 e2^4));
g2 = -((2 (-2 134 161 091 674 039 218 421 625 601 149 503 +
140 355 978 576 685 509 466 108 656 363 508 650 e2 -
1 754 283 565 687 266 330 660 162 078 035 242 500 e2^2 +
8 737 367 532 700 018 023 712 655 697 839 625 000 e2^3 -
21 589 750 138 203 633 706 431 942 941 437 500 000 e2^4 +
75 104 078 381 422 305 038 823 485 272 500 000 000 e2^5 -
513 431 090 081 409 858 991 186 790 953 125 000 000 e2^6 +
2 056 162 232 816 920 023 362 338 942 968 750 000 000 e2^7 -
3 838 597 863 908 140 206 223 129 570 312 500 000 000 e2^8 +
1 617 903 538 459 282 225 849 587 890 625 000 000 000 e2^9 +
4 615 310 325 659 104 860 692 578 125 000 000 000 000 e2^10 -
1 399 763 372 530 238 358 330 078 125 000 000 000 000 e2^11 -
20 086 555 324 348 486 795 898 437 500 000 000 000 000 e2^12 +
40 652 986 288 855 743 115 234 375 000 000 000 000 000 e2^13 -
41 911 717 827 629 003 906 250 000 000 000 000 000 000 e2^14 +
37 465 861 770 189 697 265 625 000 000 000 000 000 000 e2^15 -
37 513 628 819 775 390 625 000 000 000 000 000 000 000 e2^16 +
29 057 543 024 902 343 750 000 000 000 000 000 000 000 e2^17 -
12 113 875 488 281 250 000 000 000 000 000 000 000 000 e2^18 +
1 593 969 726 562 500 000 000 000 000 000 000 000 000 e2^19 +
263 671 875 000 000 000 000 000 000 000 000 000 000 e2^20)) /
(1875 e2 (-3549 + 850 e2 + 10 000 e2^2) (25 299 + 450 e2 - 295 000 e2^2 + 250 000 e2^3)^2
(-25 299 - 450 e2 - 320 000 e2^2 + 500 000 e2^3)
(29 488 131 - 8 127 900 e2 - 113 832 500 e2^2 - 149 000 000 e2^3 + 400 000 000 e2^4)
(38 082 789 - 250 500 e2 - 60 467 500 e2^2 - 515 000 000 e2^3 + 800 000 000 e2^4));
{c1, d1}
{c1, d1} // N
{g1, g2} // N

```

```
Out[6]=  $\left\{ \frac{233}{1000}, \frac{67983}{139000} \right\}$ 
```

```
Out[6]= {0.233, 0.489086}
```

```
Out[6]= {-0.0090896, 0.0400065}
```

```
In[6]:= Solve[{xd == 0, yd == 0}, {x, y}, Reals] // N
```

```
Out[6]= {{x -> 1., y -> 1.23381}, {x -> 0.414926, y -> 4.09403}, {x -> 0.789796, y -> 2.26142}}
```

```
In[6]:= ClearAll[sol];
```

```
sol = Solve[{xd == 0, yd == 0}, {x, y}, Reals][[1]] // N
```

```
D[{xd, yd}, {{x, y}}] /. sol;
```

```
Eigenvalues[D[{xd, yd}, {{x, y}}] /. sol] // N
```

```
Out[6]= {x -> 1., y -> 1.23381}
```

```
Out[6]= {0.000363309 + 0.242735 i, 0.000363309 - 0.242735 i}
```

```
In[6]:= 0.0003633093525180382` * 2
```

```
Out[6]= 0.000726619
```

## Plotting the limit cycles when $g_1 < 0$ , $g_2 > 0$ , $\text{trace}(J) > 0$

### Preparations

```
In[6]:= Quit
```

```
In[6]:= SetOptions[#, AxesStyle -> Arrowheads[Automatic]] & /@
```

```
{Plot, ParametricPlot, ListPlot, ListLinePlot};
```

```
SetDirectory[NotebookDirectory[]];
```

```
SetOptions[#, AxesStyle -> Arrowheads[Automatic]] & /@ {Plot, ListPlot,
```

```
ListLinePlot, ListLogLogPlot, ParametricPlot, DateListPlot, DiscretePlot};
```

```
LaunchKernels[];
```

## The function creating the plots

```

In[ ]:= ClearAll[p, q, x, y, c1, d1, d2, e1, e2, f1, f2];
p[x_, y_] := x^2 y - x y - c1 x^2 - d1 x + e1 y + f1;
q[x_, y_] := -x^2 y + x y + c1 x^2 + d2 x - e2 y + f2;
f1 =  $\frac{1}{2}$ ; f2 =  $\frac{1}{10}$ ;
e1 =  $\frac{18}{100}$ ; d2 =  $\frac{1}{100}$ ;
d1 =  $\frac{c1 (e1 - e2) + e2 f1 + e1 (d2 + f2)}{e2}$ ;
c1 =  $\frac{233}{1000}$ ; (*perturbed parameter for trace(J)>0*)
e2 =  $\frac{278}{1000}$ ; (*perturbed parameter for g1<0*)
g1 = (4 (-256 700 232 + 1 296 384 900 e2 -
970 164 375 e2^2 - 2 198 218 750 e2^3 + 1 543 750 000 e2^4 + 1 406 250 000 e2^5)) /
(625 e2 (29 488 131 - 8 127 900 e2 - 113 832 500 e2^2 - 149 000 000 e2^3 + 400 000 000 e2^4));
g2 = - ( (2 (-2 134 161 091 674 039 218 421 625 601 149 503 +
140 355 978 576 685 509 466 108 656 363 508 650 e2 -
1 754 283 565 687 266 330 660 162 078 035 242 500 e2^2 +
8 737 367 532 700 018 023 712 655 697 839 625 000 e2^3 -
21 589 750 138 203 633 706 431 942 941 437 500 000 e2^4 +
75 104 078 381 422 305 038 823 485 272 500 000 000 e2^5 -
513 431 090 081 409 858 991 186 790 953 125 000 000 e2^6 +
2 056 162 232 816 920 023 362 338 942 968 750 000 000 e2^7 -
3 838 597 863 908 140 206 223 129 570 312 500 000 000 e2^8 +
1 617 903 538 459 282 225 849 587 890 625 000 000 000 e2^9 +
4 615 310 325 659 104 860 692 578 125 000 000 000 000 e2^10 -
1 399 763 372 530 238 358 330 078 125 000 000 000 000 e2^11 -
20 086 555 324 348 486 795 898 437 500 000 000 000 000 e2^12 +
40 652 986 288 855 743 115 234 375 000 000 000 000 000 e2^13 -
41 911 717 827 629 003 906 250 000 000 000 000 000 000 e2^14 +
37 465 861 770 189 697 265 625 000 000 000 000 000 000 e2^15 -
37 513 628 819 775 390 625 000 000 000 000 000 000 000 e2^16 +
29 057 543 024 902 343 750 000 000 000 000 000 000 000 e2^17 -
12 113 875 488 281 250 000 000 000 000 000 000 000 000 e2^18 +
1 593 969 726 562 500 000 000 000 000 000 000 000 000 e2^19 +
263 671 875 000 000 000 000 000 000 000 000 000 000 e2^20) ) /
(1875 e2 (-3549 + 850 e2 + 10 000 e2^2) (25 299 + 450 e2 - 295 000 e2^2 + 250 000 e2^3)^2
(-25 299 - 450 e2 - 320 000 e2^2 + 500 000 e2^3)
(29 488 131 - 8 127 900 e2 - 113 832 500 e2^2 - 149 000 000 e2^3 + 400 000 000 e2^4)
(38 082 789 - 250 500 e2 - 60 467 500 e2^2 - 515 000 000 e2^3 + 800 000 000 e2^4) ) );
{g1, g2} // N
{e2, e1, d2, d1, f1, f2, c1}
{e2, e1, d2, d1, f1, f2, c1} // N
Out[ ]:= {-0.0090896, 0.0400065}

```

```
Out[*]= { $\frac{139}{500}, \frac{9}{50}, \frac{1}{100}, \frac{67983}{139000}, \frac{1}{2}, \frac{1}{10}, \frac{233}{1000}$ }
```

```
Out[*]= {0.278, 0.18, 0.01, 0.489086, 0.5, 0.1, 0.233}
```

```
In[*]= ClearAll[nsol, nsol1, nsol2, ev, ev1, ev2, plotter];
nsol = NSolve[Join@@Thread /@ {{p[x, y], q[x, y]} == 0, {x, y} > 0}, {x, y}, 20] [[3]]
ev = Eigenvalues[D[{{p[x, y], q[x, y]}}, {{x, y}}] /. nsol]
nsol1 = NSolve[Join@@Thread /@ {{p[x, y], q[x, y]} == 0, {x, y} > 0}, {x, y}, 20] [[1]]
ev1 = Eigenvalues[D[{{p[x, y], q[x, y]}}, {{x, y}}] /. nsol1]
nsol2 = NSolve[Join@@Thread /@ {{p[x, y], q[x, y]} == 0, {x, y} > 0}, {x, y}, 20] [[2]]
ev2 = Eigenvalues[D[{{p[x, y], q[x, y]}}, {{x, y}}] /. nsol2]
plotter[τ_, shift_, ag_ : Automatic, pg_ : Automatic, pp_ : 1000,
  ar_ : Automatic, opts___] := Module[{startingpoint, sys, solution, plot1},
  startingpoint = ({x, y} /. nsol) + shift;
  sys := NDSolveValue[Join[{u'[t] == p[u[t], v[t]], v'[t] == q[u[t], v[t]]},
    Thread[{u[0], v[0]} == startingpoint]],
    {u, v}, {t, τ}, AccuracyGoal → ag, PrecisionGoal → pg, opts];
  solution[t_] := Through[sys[t]];
  {ParametricPlot[Evaluate[solution[t]], {t, 0, τ},
    Epilog → {Red, PointSize[0.05], Point[startingpoint], Orange, Point[{x, y} /. nsol],
      Blue, Point[{x, y} /. nsol1], Green, Point[{x, y} /. nsol2]},
    PlotRange → All, PlotPoints → pp, AspectRatio → ar, AxesLabel → {x, y},
    LabelStyle → Directive[14], ImageSize → 200],
    Plot[Evaluate[solution[t] [[1]], {t, 0, τ}, PlotRange → All, PlotPoints → pp,
      AxesLabel → {t, x}, LabelStyle → Directive[12], ImageSize → 200],
    Plot[Evaluate[solution[t] [[2]], {t, 0, τ}, PlotRange → All, PlotPoints → pp,
      AxesLabel → {t, y}, LabelStyle → Directive[12], ImageSize → 200]}}
```

```
Out[*]= {x → 1.00000000000000000000, y → 1.2338129496402877698}
```

```
Out[*]= {0.000363309352517985612 + 0.242734832567487461 i,
  0.000363309352517985612 - 0.242734832567487461 i}
```

```
Out[*]= {x → 0.41492622701256916735, y → 4.0940256764463354455}
```

```
Out[*]= {-1.335594059107776771, -0.0786738624710661643}
```

```
Out[*]= {x → 0.7897961011600615896, y → 2.2614233031455012892}
```

```
Out[*]= {0.42948903134671044, -0.087898813021974952}
```

## Plotter with arrow

```

In[ ]:= ClearAll[nsol, nsol1, nsol2, ev, ev1, ev2, plotterarrow];
nsol = NSolve[Join@@Thread /@ {{p[x, y], q[x, y]} == 0, {x, y} > 0}, {x, y}, 20] [[3]]
ev = Eigenvalues[D[{{p[x, y], q[x, y]}}, {{x, y}}] /. nsol]
nsol1 = NSolve[Join@@Thread /@ {{p[x, y], q[x, y]} == 0, {x, y} > 0}, {x, y}, 20] [[1]]
ev1 = Eigenvalues[D[{{p[x, y], q[x, y]}}, {{x, y}}] /. nsol1]
nsol2 = NSolve[Join@@Thread /@ {{p[x, y], q[x, y]} == 0, {x, y} > 0}, {x, y}, 20] [[2]]
ev2 = Eigenvalues[D[{{p[x, y], q[x, y]}}, {{x, y}}] /. nsol2]
plotterarrow[τ_, shift_, ag_ : Automatic, pg_ : Automatic, pp_ : 1000, ar_ : Automatic,
  arrow_, opts___] := Module[{startingpoint, sys, solution, plot1},
  startingpoint = ({x, y} /. nsol) + shift;
  sys := NDSolveValue[Join[{u'[t] == p[u[t], v[t]], v'[t] == q[u[t], v[t]]},
    Thread[{u[0], v[0]} == startingpoint]],
    {u, v}, {t, τ}, AccuracyGoal → ag, PrecisionGoal → pg, opts];
  solution[t_] := Through[sys[t]];
  {ParametricPlot[Evaluate[solution[t]], {t, 0, τ},
    Epilog → {Black, Arrowheads → 0.07, Arrow[{startingpoint, arrow}], Red,
      PointSize[0.05], Point[startingpoint], Orange, Point[{x, y} /. nsol],
      Blue, Point[{x, y} /. nsol1], Green, Point[{x, y} /. nsol2]},
    PlotRange → All, PlotPoints → pp, AspectRatio → ar, AxesLabel → {x, y},
    LabelStyle → Directive[14], ImageSize → 200],
    Plot[Evaluate[solution[t] [[1]], {t, 0, τ}, PlotRange → All, PlotPoints → pp,
      AxesLabel → {t, x}, LabelStyle → Directive[12], ImageSize → 200],
    Plot[Evaluate[solution[t] [[2]], {t, 0, τ}, PlotRange → All, PlotPoints → pp,
      AxesLabel → {t, y}, LabelStyle → Directive[12], ImageSize → 200]}}]

Out[ ]:= {x → 1.0000000000000000, y → 1.2338129496402877698}

Out[ ]:= {0.000363309352517985612 + 0.242734832567487461 i,
  0.000363309352517985612 - 0.242734832567487461 i}

Out[ ]:= {x → 0.41492622701256916735, y → 4.0940256764463354455}

Out[ ]:= {-1.335594059107776771, -0.0786738624710661643}

Out[ ]:= {x → 0.7897961011600615896, y → 2.2614233031455012892}

Out[ ]:= {0.42948903134671044, -0.087898813021974952}

```

# Figures

```

In[ ]:= plotter[800, {0, 0.47}, Automatic, 100, 1000, 1, Method -> "BDF"]
plotterarrow[800, {0, 0.47}, Automatic, 100, 1000, 1, {1.17, 1.405}, Method -> "BDF"]
    
```

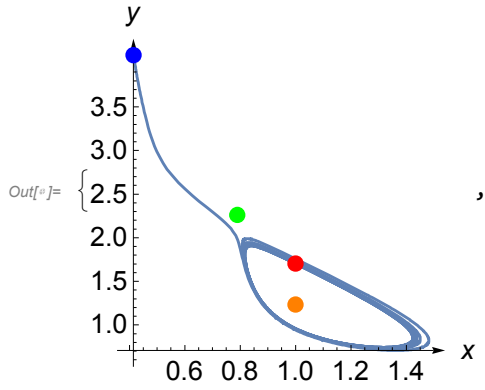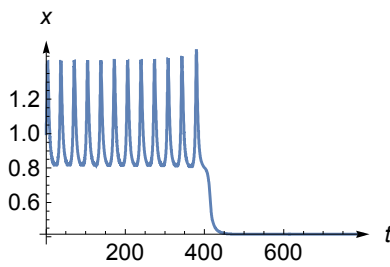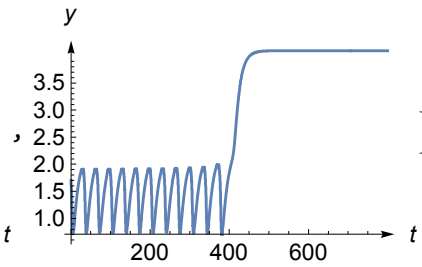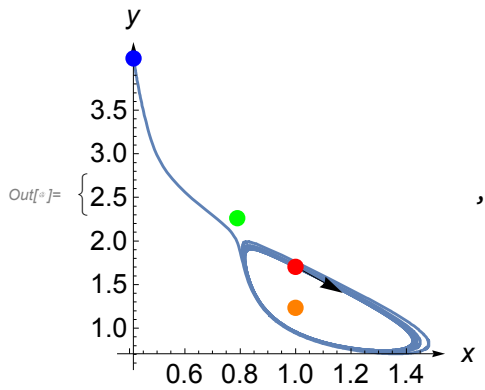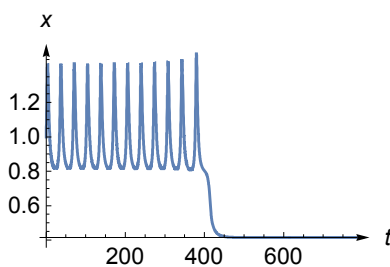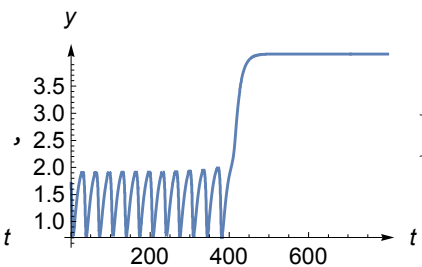



```

In[ ]:= plotter[800, {0, 0.46}, Automatic, 100, 1000, 1, Method -> "BDF"]
plotterarrow[800, {0, 0.46}, Automatic, 100, 1000, 1, {1.117, 1.506}, Method -> "BDF"]

```

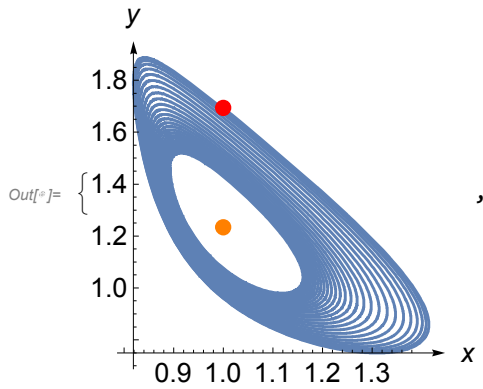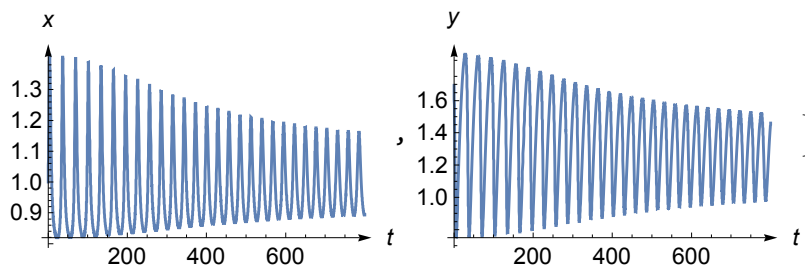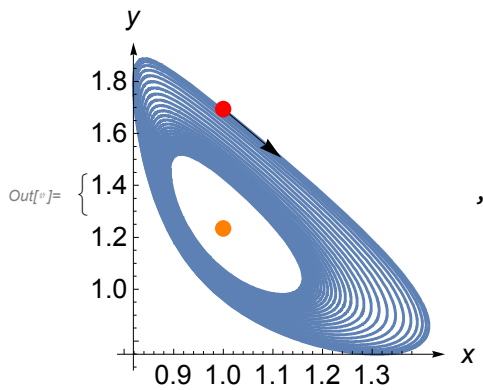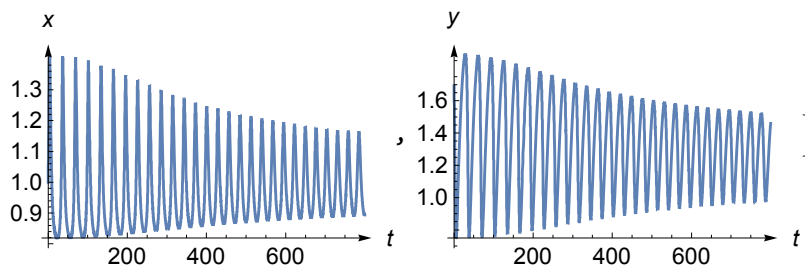

```

In[ ]:= plotter[800, {0, 0.05}, Automatic, 100, 1000, 1, Method -> "BDF"]
plotterarrow[800, {0, 0.05}, Automatic, 100, 1000, 1, {1.013, 1.26}, Method -> "BDF"]

```

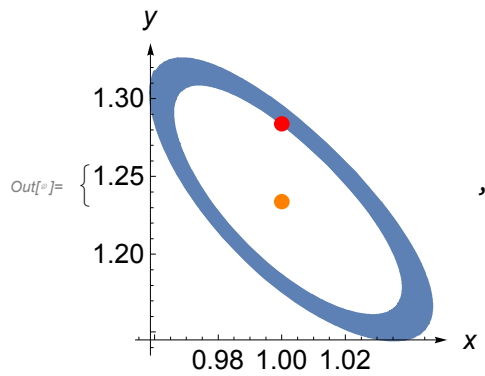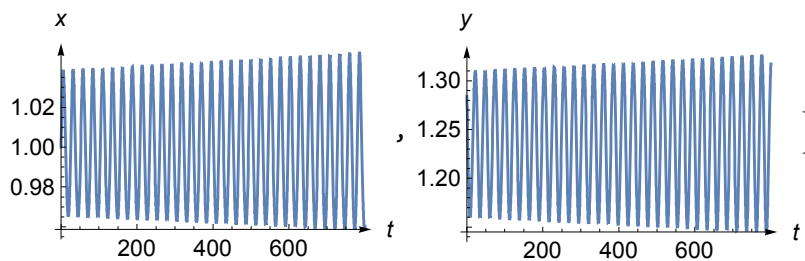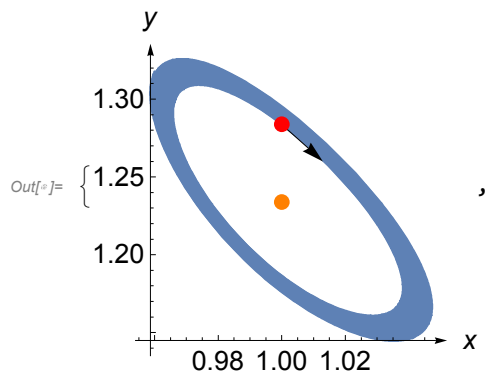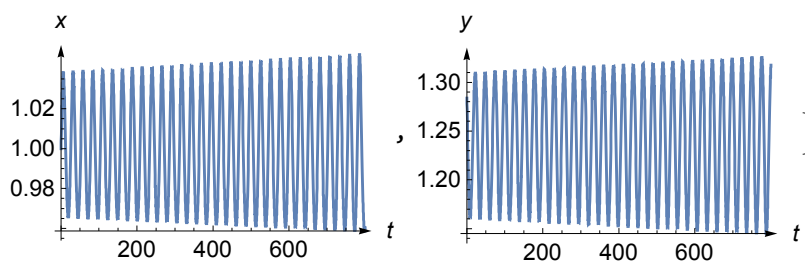

Model 2 with a stable outer an unstable inner limit cycle

## The singular point is shifted into the origin

### Singular points if $x_0 = 1$

In[<sup>e</sup>]:= Quit

```
In[e]:= ClearAll[xd, yd, x, y, c1, d1, d2, e1, e2, f1, f2];
      xd = x2 y - x y - c1 x2 - d1 x + e1 y + f1;
      yd = -x2 y + x y + c1 x2 + d2 x - e2 y + f2;
      Solve[{xd == 0, yd == 0} /. x -> 1, {d1, y}] // FullSimplify
```

Out[<sup>e</sup>]:=  $\left\{ \left\{ d1 \rightarrow \frac{c1 (e1 - e2) + e2 f1 + e1 (d2 + f2)}{e2}, y \rightarrow \frac{c1 + d2 + f2}{e2} \right\} \right\}$

### The singular point (if $x_0 = 1$ ) is shifted into (0, 0)

```
ClearAll[xd, yd, x, y, c1, d1, d2, e1, e2, f1, f2, x0, y0, x1d, y1d, xx1, yy1];
      xd = x2 y - x y - c1 x2 - d1 x + e1 y + f1;
      yd = -x2 y + x y + c1 x2 + d2 x - e2 y + f2;
      x0 = 1;
```

```
      d1 =  $\frac{c1 (e1 - e2) + e2 f1 + e1 (d2 + f2)}{e2}$ ; y0 =  $\frac{c1 + d2 + f2}{e2}$ ;
```

```
      xx1 = x - x0; yy1 = y - y0;
```

```
      x1d = D[xx1, x] xd + D[xx1, y] yd /. {x -> x1 + x0, y -> y1 + y0} // Factor
```

```
      y1d = D[yy1, x] xd + D[yy1, y] yd /. {x -> x1 + x0, y -> y1 + y0} // Factor
```

Out[<sup>e</sup>]:=  $-\frac{1}{e2} \left( -c1 x1 - d2 x1 + c1 e1 x1 + d2 e1 x1 + c1 e2 x1 + e2 f1 x1 - f2 x1 + \right.$   
 $\left. e1 f2 x1 - c1 x1^2 - d2 x1^2 + c1 e2 x1^2 - f2 x1^2 - e1 e2 y1 - e2 x1 y1 - e2 x1^2 y1 \right)$

Out[<sup>e</sup>]:=  $-\frac{1}{e2} \left( c1 x1 + d2 x1 - 2 c1 e2 x1 - d2 e2 x1 + \right.$   
 $\left. f2 x1 + c1 x1^2 + d2 x1^2 - c1 e2 x1^2 + f2 x1^2 + e2^2 y1 + e2 x1 y1 + e2 x1^2 y1 \right)$

## The Jacobian at the origin

```
In[e]:= Jac = D[{x1d, y1d}, {{x1, y1}}];
```

```
      JacOrigin = Jac /. {x1 -> 0, y1 -> 0} // Simplify
```

Out[<sup>e</sup>]:=  $\left\{ \left\{ \frac{d2 - d2 e1 - c1 (-1 + e1 + e2) - e2 f1 + f2 - e1 f2}{e2}, e1 \right\}, \left\{ -\frac{c1 + d2 - 2 c1 e2 - d2 e2 + f2}{e2}, -e2 \right\} \right\}$

```
In[e]:= trace = Tr[JacOrigin] // Factor
```

```
      Solve[trace == 0, c1] // FullSimplify
```

Out[<sup>e</sup>]:=  $-\frac{-c1 - d2 + c1 e1 + d2 e1 + c1 e2 + e2^2 + e2 f1 - f2 + e1 f2}{e2}$

Out[<sup>e</sup>]:=  $\left\{ \left\{ c1 \rightarrow \frac{d2 - d2 e1 - e2 (e2 + f1) + f2 - e1 f2}{-1 + e1 + e2} \right\} \right\}$

$$\text{In[ ]:= } \mathbf{c1} = \frac{\mathbf{d2 - d2 e1 - e2 (e2 + f1) + f2 - e1 f2}}{\mathbf{-1 + e1 + e2}};$$

**evalues = Eigenvalues [JacOrigin] // FullSimplify**

$$\text{Out[ ]:= } \left\{ -\frac{i \sqrt{\mathbf{d2 e1 (e1 - e2) - (-1 + e2) e2^2 + e1 (-f1 + e2 (-1 + e2 + 2 f1) - f2) + 2 e1^2 f2}}}{\sqrt{\mathbf{-1 + e1 + e2}}}, \right. \\ \left. i \frac{\sqrt{\mathbf{d2 e1 (e1 - e2) - (-1 + e2) e2^2 + e1 (-f1 + e2 (-1 + e2 + 2 f1) - f2) + 2 e1^2 f2}}}{\sqrt{\mathbf{-1 + e1 + e2}}} \right\}$$

**beta = -evalues[[1]]^2 // Factor**

$$\text{Out[ ]:= } \frac{\mathbf{d2 e1^2 - e1 e2 - d2 e1 e2 + e2^2 + e1 e2^2 - e2^3 - e1 f1 + 2 e1 e2 f1 - e1 f2 + 2 e1^2 f2}}{\mathbf{-1 + e1 + e2}}$$

**pp = x1d /. {x1 -> x, y1 -> y} // Factor**

**qq = y1d /. {x1 -> x, y1 -> y} // Factor**

$$\text{Out[ ]:= } \frac{\mathbf{1}}{\mathbf{-1 + e1 + e2}} \left( \mathbf{-e2 x + e1 e2 x + e2^2 x + d2 e1 x^2 - e2 x^2 + e2^2 x^2 - f1 x^2 + e2 f1 x^2 +} \right. \\ \left. \mathbf{e1 f2 x^2 - e1 y + e1^2 y + e1 e2 y - x y + e1 x y + e2 x y - x^2 y + e1 x^2 y + e2 x^2 y} \right)$$

$$\text{Out[ ]:= } -\frac{\mathbf{1}}{\mathbf{-1 + e1 + e2}} \\ \left( \mathbf{d2 e1 x - e2 x - d2 e2 x + 2 e2^2 x - f1 x + 2 e2 f1 x - f2 x + 2 e1 f2 x + d2 e1 x^2 - e2 x^2 + e2^2 x^2 -} \right. \\ \left. \mathbf{f1 x^2 + e2 f1 x^2 + e1 f2 x^2 - e2 y + e1 e2 y + e2^2 y - x y + e1 x y + e2 x y - x^2 y + e1 x^2 y + e2 x^2 y} \right)$$

## Lyapunov's theorem

### System

**Quit**

$$\text{In[ ]:= } \mathbf{pp} = \frac{\mathbf{1}}{\mathbf{-1 + e1 + e2}} \left( \mathbf{-e2 x + e1 e2 x + e2^2 x + d2 e1 x^2 - e2 x^2 + e2^2 x^2 - f1 x^2 + e2 f1 x^2 +} \right. \\ \left. \mathbf{e1 f2 x^2 - e1 y + e1^2 y + e1 e2 y - x y + e1 x y + e2 x y - x^2 y + e1 x^2 y + e2 x^2 y} \right);$$

$$\mathbf{qq} = -\frac{\mathbf{1}}{\mathbf{-1 + e1 + e2}} \left( \mathbf{d2 e1 x - e2 x - d2 e2 x + 2 e2^2 x - f1 x + 2 e2 f1 x - f2 x +} \right. \\ \left. \mathbf{2 e1 f2 x + d2 e1 x^2 - e2 x^2 + e2^2 x^2 - f1 x^2 + e2 f1 x^2 + e1 f2 x^2 -} \right. \\ \left. \mathbf{e2 y + e1 e2 y + e2^2 y - x y + e1 x y + e2 x y - x^2 y + e1 x^2 y + e2 x^2 y} \right);$$

## Program

```

In[ ]:= Ser[s_] := Plus@@Table[x^i y^{s-i} p[i, s-i], {i, 0, s}];
Hom[s_] := Table[p[s-i, i], {i, 0, s}];
hh = Sum[Ser[i], {i, 2, 6}]; (*9*)
Lie = D[hh, x] pp + D[hh, y] qq // Expand;
RHS = g1 (x^2 + y^2)^2 + g2 (x^2 + y^2)^3 + g3 (x^2 + y^2)^4 // Expand;
vv = Lie - RHS // Expand;
CoefPol[f_, s_] :=
  Module[{m, lis, t}, lis = {}; m = Expand[f]; Do[Do[If[i+j == s, lis = AppendTo[lis,
    Coefficient[m, x^i y^j] /. {x -> 0, y -> 0, z -> 0}], {i, 0, s}], {j, 0, s}];
  lis[s] = lis];
Do[CoefPol[vv, i], {i, 1, 9}];

```

## Degree 1, 2

```

In[ ]:= ls[1]
ls[2] // Factor;
sol2 = Solve[ls[2] == 0, Hom[2]] // Simplify;
{p[2, 0], p[1, 1], p[0, 2]} = {p[2, 0], p[1, 1], p[0, 2]} /. sol2[[1]];
ls[2] // Simplify

```

Out[ ]:= {0, 0}

... Solve: Equations may not give solutions for all "solve" variables.

Out[ ]:= {0, 0, 0}

## Quadratic form

```

In[ ]:= ClearAll[qv, mat, a11, det, eg];
qv = Ser[2] // FullSimplify
mat = 1 / 2 D[qv, {{x, y}, 2}];
mat // MatrixForm
a11 = mat[[1, 1]]
det = Det[mat] // Factor
eg = Eigenvalues[mat] // Simplify // Factor;

```

Out[ ]:= 
$$\frac{1}{2} \left( \frac{(d2 (e1 - e2) + (-1 + 2 e2) (e2 + f1) + (-1 + 2 e1) f2) x^2}{e2 (-1 + e1 + e2)} + 2 x y + \frac{e1 y^2}{e2} \right) p[1, 1]$$

Out[ ]//MatrixForm=

$$\begin{pmatrix} \frac{(d2 (e1 - e2) + (-1 + 2 e2) (e2 + f1) + (-1 + 2 e1) f2) p[1, 1]}{2 e2 (-1 + e1 + e2)} & \frac{1}{2} p[1, 1] \\ \frac{1}{2} p[1, 1] & \frac{e1 p[1, 1]}{2 e2} \end{pmatrix}$$

Out[ ]:= 
$$\frac{(d2 (e1 - e2) + (-1 + 2 e2) (e2 + f1) + (-1 + 2 e1) f2) p[1, 1]}{2 e2 (-1 + e1 + e2)}$$

Out[ ]:= 
$$\frac{(d2 e1^2 - e1 e2 - d2 e1 e2 + e2^2 + e1 e2^2 - e2^3 - e1 f1 + 2 e1 e2 f1 - e1 f2 + 2 e1^2 f2) p[1, 1]^2}{4 e2^2 (-1 + e1 + e2)}$$

## Conditions for a positive definite quadratic form

$$\begin{aligned} \text{In}[^*]= \quad d1 &= \frac{c1 (e1 - e2) + e2 f1 + e1 (d2 + f2)}{e2}; \quad y0 = \frac{c1 + d2 + f2}{e2}; \\ c1 &= \frac{d2 - d2 e1 - e2 (e2 + f1) + f2 - e1 f2}{-1 + e1 + e2}; \\ \text{beta} &= \frac{d2 e1^2 - e1 e2 - d2 e1 e2 + e2^2 + e1 e2^2 - e2^3 - e1 f1 + 2 e1 e2 f1 - e1 f2 + 2 e1^2 f2}{-1 + e1 + e2}; \end{aligned}$$

```
In[^*]= Reduce[ a11 > 0 && det > 0 && beta > 0 && y0 > 0 && c1 > 0 && d1 > 0 && d2 > 0 &&
e1 > 0 && e2 > 0 && f1 > 0 && f2 > 0, {d2, e1, e2, f1, f2} ] // FullSimplify
```

```
Out[^*]= $Aborted
```

## Setting f1 and f2

```
In[^*]= ClearAll[f1, f2];
p[1, 1] = 1; f1 = 1; f2 = 1;
```

```
In[^*]= Reduce[ a11 > 0 && det > 0 && beta > 0 && y0 > 0 && c1 > 0 && d1 > 0 && d2 > 0 && e1 > 0 && e2 > 0,
{d2, e1, e2} ] // FullSimplify
```

```
Out[^*]= (e1 + e2 > 1 && ((e1 < 1 && Sqrt[5 + 4 d2 - 4 (1 + d2) e1] > 1 + 2 e2 && ((d2 > 1/2 + Sqrt[3] &&
e1 >= Root[-1 - 2 d2 - d2^2 + (7 + 6 d2 + d2^2) #1 + (-5 - 2 d2) #1^2 + #1^3 &, 1] ||
(2 d2 <= 1 && d2 > 0 && d2 + e1 > 1) || (d2 <= 1/2 + Sqrt[3] && 2 d2 > 1 && 2 e1 >= 1)))) ||
(e1 < Root[-1 - 2 d2 - d2^2 + (7 + 6 d2 + d2^2) #1 + (-5 - 2 d2) #1^2 + #1^3 &, 1] &&
((e2 < Root[2 e1 - 2 e1^2 - d2 e1^2 + (-e1 + d2 e1) #1 + (-1 - e1) #1^2 + #1^3 &, 1] &&
((2 e1 > 1 && 2 d2 >= 5) || (d2 > Sqrt[2.29...] && e1 > Root[-8 + (55 + 42 d2 - d2^2) #1 +
(-222 - 62 d2 - 32 d2^2 + 4 d2^3) #1^2 + (159 + 104 d2 + 8 d2^2) #1^3 + (8 + 4 d2)
#1^4 &, 4] && 2 d2 < 5)))) || (d2 <= Sqrt[2.29...] && d2 > 1/2 + Sqrt[3] && 2 e1 >= 1 &&
e2 < Root[2 e1 - 2 e1^2 - d2 e1^2 + (-e1 + d2 e1) #1 + (-1 - e1) #1^2 + #1^3 &, 3] ||
(2 d2 < 5 && d2 > Sqrt[2.29...] && 2 e1 >= 1 && e2 < Root[
2 e1 - 2 e1^2 - d2 e1^2 + (-e1 + d2 e1) #1 + (-1 - e1) #1^2 + #1^3 &, 3] &&
e1 <= Root[-8 + (55 + 42 d2 - d2^2) #1 + (-222 - 62 d2 - 32 d2^2 + 4 d2^3) #1^2 +
(159 + 104 d2 + 8 d2^2) #1^3 + (8 + 4 d2) #1^4 &, 4] ||
(e2 > Root[2 e1 - 2 e1^2 - d2 e1^2 + (-e1 + d2 e1) #1 + (-1 - e1) #1^2 + #1^3 &,
2] &&
((2 e1 < 1 && ((Sqrt[5 + 4 d2 - 4 (1 + d2) e1] > 1 + 2 e2 && ((d2 < 1/2 + Sqrt[3] && d2 > Sqrt[1.74...] && e1 >=
```

$$\begin{aligned}
& \left( \text{Root} \left[ -1 - 2 d2 - d2^2 + (7 + 6 d2 + d2^2) \#1 + (-5 - 2 d2) \#1^2 + \#1^3 \& , 1 \right] \right) \|\| \\
& \left( d2 \leq \frac{1}{\sqrt{2}} \& \& d2 > 1 \& \& d2 + e1 > 1 \right) \|\| \left( d2 \leq \sqrt{-1.74\dots} \& \& d2 > \frac{1}{\sqrt{2}} \& \& e1 > \right. \\
& \left. \text{Root} \left[ -1 - 2 d2 - d2^2 + (7 + 6 d2 + d2^2) \#1 + (-5 - 2 d2) \#1^2 + \#1^3 \& , 1 \right] \right) \|\| \\
& \left( 2 d2 < 5 \& \& d2 \geq \frac{1}{2} + \sqrt{3} \& \& e2 < \text{Root} \left[ 2 e1 - 2 e1^2 - d2 e1^2 + (-e1 + d2 e1) \right. \right. \\
& \left. \left. \#1 + (-1 - e1) \#1^2 + \#1^3 \& , 3 \right] \& \& \right. \\
& \left. e1 > \text{Root} \left[ -8 + (55 + 42 d2 - d2^2) \#1 + (-222 - 62 d2 - 32 d2^2 + 4 d2^3) \right. \right. \\
& \left. \left. \#1^2 + (159 + 104 d2 + 8 d2^2) \#1^3 + (8 + 4 d2) \#1^4 \& , 3 \right] \right) \|\| \\
& \left( d2 < \frac{1}{2} + \sqrt{3} \& \& d2 > \sqrt{-1.74\dots} \& \& e1 < \text{Root} \left[ -1 - 2 d2 - d2^2 + (7 + 6 d2 + d2^2) \#1 + \right. \right. \\
& \left. \left. (-5 - 2 d2) \#1^2 + \#1^3 \& , 1 \right] \& \& \right. \\
& \left. e2 < \text{Root} \left[ 2 e1 - 2 e1^2 - d2 e1^2 + (-e1 + d2 e1) \#1 + (-1 - e1) \#1^2 + \#1^3 \& , 3 \right] \& \& \right. \\
& \left. e1 > \text{Root} \left[ -8 + (55 + 42 d2 - d2^2) \#1 + (-222 - 62 d2 - 32 d2^2 + 4 d2^3) \#1^2 + \right. \right. \\
& \left. \left. (159 + 104 d2 + 8 d2^2) \#1^3 + (8 + 4 d2) \#1^4 \& , 3 \right] \right) \|\| \\
& \left( \sqrt{5 + 4 d2 - 4 (1 + d2) e1} < 1 + 2 e2 \& \& \right. \\
& \left( \left( e1 > \text{Root} \left[ -1 - 2 d2 - d2^2 + (7 + 6 d2 + d2^2) \#1 + (-5 - 2 d2) \#1^2 + \#1^3 \& , 1 \right] \& \& \right. \right. \\
& \left. \left. e2 < \text{Root} \left[ 2 e1 - 2 e1^2 - d2 e1^2 + (-e1 + d2 e1) \#1 + (-1 - e1) \#1^2 + \#1^3 \& , 2 \right] \& \& \right. \right. \\
& \left. \left( \left( 2 d2 > 1 \& \& d2 < \frac{1}{\sqrt{2}} \& \& d2 + e1 < 1 \right) \|\| \left( d2 + \sqrt{-0.0933\dots} \geq 0 \& \& 2 e1 < 1 \& \& 2 d2 \leq 1 \right) \|\| \right. \\
& \left. \left( d2 > 0 \& \& d2 + \sqrt{-0.0933\dots} < 0 \& \& 2 e1 \leq 1 \right) \right) \|\| \\
& \left( d2 + e1 < 1 \& \& e1 + e2 < 1 \& \& \left( \left( 2 e1 \geq 1 \& \& d2 + \sqrt{-0.0933\dots} \geq 0 \& \& 2 d2 \leq 1 \right) \|\| \right. \right. \\
& \left. \left. \left( d2 > 0 \& \& 2 e1 > 1 \& \& d2 + \sqrt{-0.0933\dots} < 0 \right) \right) \right) \|\|
\end{aligned}$$

## Degree 3

```

In[ ]:= ls[3] // Factor;
sol3 = Solve[ls[3] == 0, Hom[3]] // Simplify;
{p[3, 0], p[2, 1], p[1, 2], p[0, 3]} =
  {p[3, 0], p[2, 1], p[1, 2], p[0, 3]} /. sol3[[1]] // Factor;
ls[3] // Simplify
Out[ ]:= {0, 0, 0, 0}

```

## Degree 4

```
In[ ]:= ls[4] // Factor;
sol4 = Solve[ls[4] == 0, AppendTo[Hom[4], g1]];
{g1, p[4, 0], p[3, 1], p[2, 2], p[1, 3], p[0, 4]} =
  {g1, p[4, 0], p[3, 1], p[2, 2], p[1, 3], p[0, 4]} /. sol4[[1]];
g1 //
Factor
```

... Solve: Equations may not give solutions for all "solve" variables.

```
Out[ ]:= (-2 e1 + e1^2 + 3 d2 e1^2 + 4 e1^3 + d2 e1^3 - d2^2 e1^3 - 3 e1^4 - 4 d2 e1^4 - 2 d2^2 e1^4 + 2 e2 - 4 e1 e2 -
  2 d2 e1 e2 + 5 e1^2 e2 - 4 d2 e1^2 e2 + d2^2 e1^2 e2 - 3 e1^3 e2 + 5 d2 e1^3 e2 + 2 d2^2 e1^3 e2 -
  5 e2^2 + d2 e2^2 + 18 e1 e2^2 - 10 e1^2 e2^2 - 2 d2 e1^2 e2^2 - 4 e1^3 e2^2 - 4 d2 e1^3 e2^2 + 3 e2^3 -
  d2 e2^3 - 12 e1 e2^3 + d2 e1 e2^3 + 5 e1^2 e2^3 + 4 d2 e1^2 e2^3 - e1 e2^4 - 2 e1^2 e2^4 + 2 e1 e2^5) /
  (e2 (12 - 20 e1 - 12 d2 e1 + 7 e1^2 + 10 d2 e1^2 + 3 d2^2 e1^2 - 2 e1^3 + 2 d2 e1^3 + 3 e1^4 - 12 e2 +
  12 d2 e2 + 6 e1 e2 - 4 d2 e1 e2 - 6 d2^2 e1 e2 + 6 e1^3 e2 - 17 e2^2 - 6 d2 e2^2 + 3 d2^2 e2^2 +
  14 e1 e2^2 + 10 d2 e1 e2^2 + 11 e1^2 e2^2 + 4 e2^3 - 12 d2 e2^3 + 12 e1 e2^3 + 16 e2^4))
```

```
In[ ]:= Variables[g1]
```

```
Out[ ]:= {e2, e1, d2}
```

## Degree 5

```
In[ ]:= ls[5] // Factor;
sol5 = Solve[ls[5] == 0, Hom[5]];
{p[5, 0], p[4, 1], p[3, 2], p[2, 3], p[1, 4], p[0, 5]} =
  {p[5, 0], p[4, 1], p[3, 2], p[2, 3], p[1, 4], p[0, 5]} /. sol5[[1]] // Factor;
ls[5] // Factor
```

```
Out[ ]:= {0, 0, 0, 0, 0, 0}
```

## Degree 6

```
In[ ]:= ls[6] // Factor;
sol6 = Solve[ls[6] == 0, AppendTo[Hom[6], g2]];
{p[6, 0], p[5, 1], p[4, 2], p[3, 3], p[2, 4], p[1, 5], p[0, 6], g2} =
  {p[6, 0], p[5, 1], p[4, 2], p[3, 3], p[2, 4], p[1, 5], p[0, 6], g2} /. sol6[[1]] // Factor;
```

... Solve: Equations may not give solutions for all "solve" variables.

```
In[ ]:= g2
```

```
Variables[g2]
```

```
Out[ ]:= 
$$\frac{-192 e1^3 + 3744 e1^4 + \dots 2933 \dots + 288 d2 e1 e2^{19} p[2, 2] + 864 e1^2 e2^{19} p[2, 2] - 384 e1 e2^{20} p[2, 2]}{3 e2 \dots 3 \dots ( \dots 1 \dots ) (20 - 44 e1 - 20 d2 e1 + 33 e1^2 + 22 d2 e1^2 + \dots 24 \dots + 13 e1^2 e2^2 - 4 e2^3 - 20 d2 e2^3 + 20 e1 e2^3 + 32 e2^4)}$$

```

large output

show less

show more

show all

set size limit...

```
Out[ ]:= {e2, e1, d2, p[2, 2]}
```



```
In[ ]:= p[2, 2] = 0;
      g2;
```

```
In[ ]:= Variables[g2]
```

```
Out[ ]:= {e2, e1, d2}
```

## Investigating the possible values of e1 and d2

```
In[ ]:= ClearAll[d2, e1, e2]; e1 =  $\frac{1}{10}$ ;
      Reduce[ g1 == 0 && g2 < 0 && a11 > 0 && det > 0 && beta > 0 &&
      y0 > 0 && c1 > 0 && d1 > 0 && d2 > 0 && e2 > 0, {d2, e2} ] // FullSimplify
      Reduce[ g1 == 0 && g2 > 0 && a11 > 0 && det > 0 && beta > 0 && y0 > 0 &&
      c1 > 0 && d1 > 0 && d2 > 0 && e2 > 0, {d2, e2} ] // FullSimplify
      Reduce[ g1 == 0 && g2 == 0 && a11 > 0 && det > 0 && beta > 0 && y0 > 0 &&
      c1 > 0 && d1 > 0 && d2 > 0 && e2 > 0, {d2, e2} ] // FullSimplify
Out[ ]:= False
Out[ ]:= False
Out[ ]:= False
```

```
In[ ]:= ClearAll[d2, e1, e2]; e1 =  $\frac{2}{10}$ ;
      Reduce[ g1 == 0 && g2 < 0 && a11 > 0 && det > 0 && beta > 0 &&
      y0 > 0 && c1 > 0 && d1 > 0 && d2 > 0 && e2 > 0, {d2, e2} ] // FullSimplify
      Reduce[ g1 == 0 && g2 > 0 && a11 > 0 && det > 0 && beta > 0 && y0 > 0 &&
      c1 > 0 && d1 > 0 && d2 > 0 && e2 > 0, {d2, e2} ] // FullSimplify
      Reduce[ g1 == 0 && g2 == 0 && a11 > 0 && det > 0 && beta > 0 && y0 > 0 &&
      c1 > 0 && d1 > 0 && d2 > 0 && e2 > 0, {d2, e2} ] // FullSimplify
Out[ ]:= False
Out[ ]:= False
Out[ ]:= False
```

```

In[ ]:= ClearAll[d2, e1, e2]; e1 =  $\frac{3}{10}$ ;
Reduce[ g1 == 0 && g2 < 0 && a11 > 0 && det > 0 && beta > 0 &&
  y0 > 0 && c1 > 0 && d1 > 0 && d2 > 0 && e2 > 0, {d2, e2} ] // FullSimplify
Reduce[ g1 == 0 && g2 > 0 && a11 > 0 && det > 0 && beta > 0 && y0 > 0 &&
  c1 > 0 && d1 > 0 && d2 > 0 && e2 > 0, {d2, e2} ] // FullSimplify
Reduce[ g1 == 0 && g2 == 0 && a11 > 0 && det > 0 && beta > 0 && y0 > 0 &&
  c1 > 0 && d1 > 0 && d2 > 0 && e2 > 0, {d2, e2} ] // FullSimplify
Out[ ]:=  $\left( 0 < d2 < \frac{7}{10} \ \&\& \ e2 == \text{Root}[-4263 + 2646 d2 - 432 d2^2 + (11690 - 8250 d2 + 1440 d2^2) \#1 + \right.$ 
 $\left. (-6080 + 7120 d2) \#1^2 + (-1500 - 3400 d2) \#1^3 - 4800 \#1^4 + 6000 \#1^5 \ \&\&, 1 \right) \ ||$ 
 $\left( \frac{7}{10} < d2 < \sqrt{0.735\dots} \ \&\& \ e2 == \text{Root}[-4263 + 2646 d2 - 432 d2^2 + (11690 - 8250 d2 + 1440 d2^2) \#1 + \right.$ 
 $\left. (-6080 + 7120 d2) \#1^2 + (-1500 - 3400 d2) \#1^3 - 4800 \#1^4 + 6000 \#1^5 \ \&\&, 2 \right)$ 

```

Out[ ]:= False

Out[ ]:= False

## Setting the value of d2

```

In[ ]:= ClearAll[d2, e1, e2]; d2 = 3 / 10;
Reduce[ g1 == 0 && g2 < 0 && a11 > 0 && det > 0 && beta > 0 &&
  y0 > 0 && c1 > 0 && d1 > 0 && e1 ≥ 0 && e2 > 0, {e1, e2} ] // FullSimplify
Reduce[ g1 == 0 && g2 > 0 && a11 > 0 && det > 0 && beta > 0 && y0 > 0 &&
  c1 > 0 && d1 > 0 && e1 ≥ 0 && e2 > 0, {e1, e2} ] // FullSimplify
Reduce[ g1 == 0 && g2 == 0 && a11 > 0 && det > 0 && beta > 0 && y0 > 0 &&
  c1 > 0 && d1 > 0 && e1 ≥ 0 && e2 > 0, {e1, e2} ] // FullSimplify
Out[ ]:=  $\left( 39 + \sqrt{5713 - 4008 \sqrt{2}} + 20 e1 > 36 \sqrt{2} \ \&\& \right.$ 
 $\left. e1 + \sqrt{-0.492\dots} < 0 \ \&\& \ e2 == \text{Root}[-200 e1 + 190 e1^2 + 421 e1^3 - 438 e1^4 + \right.$ 
 $\left. (200 - 460 e1 + 389 e1^2 - 132 e1^3) \#1 + (-470 + 1800 e1 - 1060 e1^2 - 520 e1^3) \#1^2 + \right.$ 
 $\left. (270 - 1170 e1 + 620 e1^2) \#1^3 + (-100 e1 - 200 e1^2) \#1^4 + 200 e1 \#1^5 \ \&\&, 1 \right) \ ||$ 
 $\left( \sqrt{0.492\dots} \leq e1 < \frac{1}{2} \ \&\& \ e2 == \text{Root}[-200 e1 + 190 e1^2 + 421 e1^3 - 438 e1^4 + \right.$ 
 $\left. (200 - 460 e1 + 389 e1^2 - 132 e1^3) \#1 + (-470 + 1800 e1 - 1060 e1^2 - 520 e1^3) \#1^2 + \right.$ 
 $\left. (270 - 1170 e1 + 620 e1^2) \#1^3 + (-100 e1 - 200 e1^2) \#1^4 + 200 e1 \#1^5 \ \&\&, 3 \right)$ 

```

Out[ ]:= False

Out[ ]:= False

## Setting the value of e1, d2 such that g1=0, g2<0

```
In[ ]:= ClearAll[d2, e1, e2]; e1 =  $\frac{3}{10}$ ; d2 =  $\frac{4}{10}$ ;
Reduce[ g1 == 0 && g2 < 0 && a11 > 0 && det > 0 &&
  beta > 0 && y0 > 0 && c1 > 0 && d1 > 0 && e2 > 0, {e2} ] // FullSimplify
Reduce[ g1 == 0 && g2 > 0 && a11 > 0 && det > 0 && beta > 0 && y0 > 0 && c1 > 0 && d1 > 0 && e2 > 0,
  {e2} ] // FullSimplify
Reduce[ g1 == 0 && g2 == 0 && a11 > 0 && det > 0 && beta > 0 && y0 > 0 && c1 > 0 && d1 > 0 && e2 > 0,
  {e2} ] // FullSimplify
```

```
Out[ ]:= 30 e2 +  $\sqrt{-18.9\dots}$  == 0
```

```
Out[ ]:= False
```

```
Out[ ]:= False
```

```
In[ ]:= g1 // Factor
```

```
Out[ ]:= 
$$\frac{-81\,843 + 215\,510\,e2 - 80\,800\,e2^2 - 71\,500\,e2^3 - 120\,000\,e2^4 + 150\,000\,e2^5}{25\,e2\,(55\,851 - 60\,060\,e2 - 125\,300\,e2^2 + 28\,000\,e2^3 + 160\,000\,e2^4)}$$

```

```
In[ ]:= g2 // Factor
```

```
Out[ ]:= - 
$$\left( (-7\,163\,477\,245\,732\,849\,632 + 108\,834\,719\,548\,271\,657\,265\,e2 - 618\,997\,960\,691\,032\,506\,300\,e2^2 + 1\,654\,315\,932\,275\,893\,272\,000\,e2^3 - 1\,921\,827\,260\,759\,476\,942\,500\,e2^4 + 895\,027\,619\,630\,747\,687\,500\,e2^5 - 5\,443\,787\,618\,252\,766\,375\,000\,e2^6 + 23\,247\,943\,465\,166\,542\,500\,000\,e2^7 - 40\,625\,221\,075\,278\,218\,750\,000\,e2^8 + 34\,972\,974\,592\,196\,812\,500\,000\,e2^9 - 20\,364\,241\,867\,282\,500\,000\,000\,e2^{10} + 26\,751\,631\,674\,075\,000\,000\,000\,e2^{11} - 36\,525\,826\,237\,125\,000\,000\,000\,e2^{12} + 20\,523\,696\,210\,000\,000\,000\,000\,e2^{13} - 5\,042\,947\,712\,500\,000\,000\,000\,e2^{14} + 20\,423\,760\,000\,000\,000\,000\,000\,e2^{15} - 40\,658\,469\,375\,000\,000\,000\,000\,e2^{16} + 34\,192\,681\,250\,000\,000\,000\,000\,e2^{17} - 13\,181\,250\,000\,000\,000\,000\,000\,e2^{18} + 1\,170\,000\,000\,000\,000\,000\,000\,e2^{19} + 450\,000\,000\,000\,000\,000\,000\,e2^{20}) / \right.$$


$$\left( 300\,e2\,(-149 + 90\,e2 + 200\,e2^2)\,(96 - 45\,e2 - 325\,e2^2 + 250\,e2^3)^2 \right.$$


$$\left. \left. (-96 + 45\,e2 - 200\,e2^2 + 500\,e2^3)\,(55\,851 - 60\,060\,e2 - 125\,300\,e2^2 + 28\,000\,e2^3 + 160\,000\,e2^4)\,(78\,749 - 72\,900\,e2 - 169\,900\,e2^2 - 60\,000\,e2^3 + 320\,000\,e2^4) \right) \right)$$

```

```
In[ ]:= e2 = -  $\frac{\sqrt{-18.9\dots}}{30}$ ;
```

```
e2 // N
```

```
Out[ ]:= 0.63138
```

# Perturbation

## 1. Setting $e_2$ such that $g_1 = 0$ , $g_2 < 0$ , $\text{trace}(J) = 0$

In[ ]:= Quit

In[ ]:= ClearAll[xd, yd, c1, d1, d2, e1, e2, f1, f2, g1, g2, sol];

$$xd = x^2 y - x y - c1 x^2 - d1 x + e1 y + f1;$$

$$yd = -x^2 y + x y + c1 x^2 + d2 x - e2 y + f2;$$

$$f1 = 1; f2 = 1;$$

$$e1 = \frac{3}{10}; d2 = \frac{4}{10};$$

$$d1 = \frac{c1 (e1 - e2) + e2 f1 + e1 (d2 + f2)}{e2};$$

$$c1 = \frac{d2 - d2 e1 - e2 (e2 + f1) + f2 - e1 f2}{-1 + e1 + e2};$$

$$e2 = -\frac{-18.9\dots}{30};$$

$$g1 = \frac{-81843 + 215510 e2 - 80800 e2^2 - 71500 e2^3 - 120000 e2^4 + 150000 e2^5}{25 e2 (55851 - 60060 e2 - 125300 e2^2 + 28000 e2^3 + 160000 e2^4)};$$

$$g2 = -\left( (-7163477245732849632 + 108834719548271657265 e2 - 618997960691032506300 e2^2 + 1654315932275893272000 e2^3 - 1921827260759476942500 e2^4 + 895027619630747687500 e2^5 - 5443787618252766375000 e2^6 + 23247943465166542500000 e2^7 - 40625221075278218750000 e2^8 + 34972974592196812500000 e2^9 - 20364241867282500000000 e2^{10} + 26751631674075000000000 e2^{11} - 36525826237125000000000 e2^{12} + 20523696210000000000000 e2^{13} - 5042947712500000000000 e2^{14} + 20423760000000000000000 e2^{15} - 40658469375000000000000 e2^{16} + 34192681250000000000000 e2^{17} - 13181250000000000000000 e2^{18} + 11700000000000000000000 e2^{19} + 45000000000000000000000 e2^{20}) / \left( (300 e2 (-149 + 90 e2 + 200 e2^2) (96 - 45 e2 - 325 e2^2 + 250 e2^3))^2 (-96 + 45 e2 - 200 e2^2 + 500 e2^3) (55851 - 60060 e2 - 125300 e2^2 + 28000 e2^3 + 160000 e2^4) (78749 - 72900 e2 - 169900 e2^2 - 60000 e2^3 + 320000 e2^4) \right);$$

{c1, d1, e2} // N

{g1, g2} // N

Out[ ]:= {0.728939, 1.28263, 0.63138}

Out[ ]:= {1.52172 × 10<sup>-15</sup>, -0.0493633}

In[ ]:= Solve[{xd == 0, yd == 0}, {x, y}, Reals] // N

Out[ ]:= {{x → 1., y → 3.37188}}

## 2. Perturbing $e_2$ such that $g_1 > 0$ , $g_2 < 0$ , $\text{trace}(J) = 0$

In[ ]:= Quit

In[ ]:= ClearAll[xd, yd, c1, d1, d2, e1, e2, f1, f2, g1, g2, sol];

$$xd = x^2 y - x y - c_1 x^2 - d_1 x + e_1 y + f_1;$$

$$yd = -x^2 y + x y + c_1 x^2 + d_2 x - e_2 y + f_2;$$

$$f_1 = 1; f_2 = 1;$$

$$e_1 = \frac{3}{10}; d_2 = \frac{4}{10};$$

$$d_1 = \frac{c_1 (e_1 - e_2) + e_2 f_1 + e_1 (d_2 + f_2)}{e_2};$$

$$c_1 = \frac{d_2 - d_2 e_1 - e_2 (e_2 + f_1) + f_2 - e_1 f_2}{-1 + e_1 + e_2};$$

$$e_2 = \frac{633}{1000}; (*perturbed parameter for g_1 > 0*)$$

$$g_1 = \frac{-81843 + 215510 e_2 - 80800 e_2^2 - 71500 e_2^3 - 120000 e_2^4 + 150000 e_2^5}{25 e_2 (55851 - 60060 e_2 - 125300 e_2^2 + 28000 e_2^3 + 160000 e_2^4)};$$

$$g_2 =$$

$$\begin{aligned} & - \left( (-7163477245732849632 + 108834719548271657265 e_2 - 618997960691032506300 e_2^2 + \right. \\ & \quad 1654315932275893272000 e_2^3 - 1921827260759476942500 e_2^4 + \\ & \quad 895027619630747687500 e_2^5 - 5443787618252766375000 e_2^6 + \\ & \quad 23247943465166542500000 e_2^7 - 40625221075278218750000 e_2^8 + \\ & \quad 34972974592196812500000 e_2^9 - 20364241867282500000000 e_2^{10} + \\ & \quad 26751631674075000000000 e_2^{11} - 36525826237125000000000 e_2^{12} + \\ & \quad 20523696210000000000000 e_2^{13} - 5042947712500000000000 e_2^{14} + \\ & \quad 20423760000000000000000 e_2^{15} - 4065846937500000000000 e_2^{16} + \\ & \quad 34192681250000000000000 e_2^{17} - 13181250000000000000000 e_2^{18} + \\ & \quad \left. 11700000000000000000000 e_2^{19} + 4500000000000000000000 e_2^{20}) / \right. \\ & \quad \left( 300 e_2 (-149 + 90 e_2 + 200 e_2^2) (96 - 45 e_2 - 325 e_2^2 + 250 e_2^3)^2 \right. \\ & \quad \left. (-96 + 45 e_2 - 200 e_2^2 + 500 e_2^3) (55851 - 60060 e_2 - 125300 e_2^2 + 28000 e_2^3 + \right. \\ & \quad \left. 160000 e_2^4) (78749 - 72900 e_2 - 169900 e_2^2 - 60000 e_2^3 + 320000 e_2^4) \right); \end{aligned}$$

{c1, d1}

{c1, d1} // N

{g1, g2} // N

$$\text{Out[ ]:= } \left\{ \frac{53689}{67000}, \frac{83211}{67000} \right\}$$

$$\text{Out[ ]:= } \{0.801328, 1.24196\}$$

$$\text{Out[ ]:= } \{0.00642203, -0.301207\}$$

In[ ]:= sol = Solve[{xd == 0, yd == 0}, {x, y}, Reals] // N

$$\text{Out[ ]:= } \{\{x \rightarrow 1., y \rightarrow 3.47761\}\}$$

### 3. Perturbing $c_1$ and $e_2$ such that $g_1 > 0$ , $g_2 < 0$ , $\text{trace}(J) < 0$

In[ ]:= Quit

In[ ]:= ClearAll[xd, yd, c1, d1, d2, e1, e2, f1, f2, g1, g2, sol];

$$xd = x^2 y - x y - c_1 x^2 - d_1 x + e_1 y + f_1;$$

$$yd = -x^2 y + x y + c_1 x^2 + d_2 x - e_2 y + f_2;$$

$$f_1 = 1; f_2 = 1;$$

$$e_1 = \frac{3}{10}; d_2 = \frac{4}{10};$$

$$d_1 = \frac{c_1 (e_1 - e_2) + e_2 f_1 + e_1 (d_2 + f_2)}{e_2};$$

$$c_1 = \frac{79}{100}; (*\text{perturbed parameter for trace}(J) < 0*)$$

$$e_2 = \frac{633}{1000}; (*\text{perturbed parameter for } g_1 > 0*)$$

$$g_1 = \frac{-81843 + 215510 e_2 - 80800 e_2^2 - 71500 e_2^3 - 120000 e_2^4 + 150000 e_2^5}{25 e_2 (55851 - 60060 e_2 - 125300 e_2^2 + 28000 e_2^3 + 160000 e_2^4)};$$

$g_2 =$

$$\begin{aligned} & - \left( (-7163477245732849632 + 108834719548271657265 e_2 - 618997960691032506300 e_2^2 + \right. \\ & \quad 1654315932275893272000 e_2^3 - 1921827260759476942500 e_2^4 + \\ & \quad 895027619630747687500 e_2^5 - 5443787618252766375000 e_2^6 + \\ & \quad 23247943465166542500000 e_2^7 - 40625221075278218750000 e_2^8 + \\ & \quad 34972974592196812500000 e_2^9 - 20364241867282500000000 e_2^{10} + \\ & \quad 26751631674075000000000 e_2^{11} - 36525826237125000000000 e_2^{12} + \\ & \quad 20523696210000000000000 e_2^{13} - 5042947712500000000000 e_2^{14} + \\ & \quad 20423760000000000000000 e_2^{15} - 4065846937500000000000 e_2^{16} + \\ & \quad 34192681250000000000000 e_2^{17} - 13181250000000000000000 e_2^{18} + \\ & \quad \left. 11700000000000000000000 e_2^{19} + 4500000000000000000000 e_2^{20}) / \right. \\ & \quad \left( 300 e_2 (-149 + 90 e_2 + 200 e_2^2) (96 - 45 e_2 - 325 e_2^2 + 250 e_2^3)^2 \right. \\ & \quad \left. (-96 + 45 e_2 - 200 e_2^2 + 500 e_2^3) (55851 - 60060 e_2 - 125300 e_2^2 + 28000 e_2^3 + \right. \\ & \quad \left. 160000 e_2^4) (78749 - 72900 e_2 - 169900 e_2^2 - 60000 e_2^3 + 320000 e_2^4) \right); \end{aligned}$$

{c1, d1}

{c1, d1} // N

{g1, g2} // N

$$\text{Out[ ]:= } \left\{ \frac{79}{100}, \frac{26331}{21100} \right\}$$

$$\text{Out[ ]:= } \{0.79, 1.24791\}$$

$$\text{Out[ ]:= } \{0.00642203, -0.301207\}$$

```

In[ ]:= ClearAll[sol];
sol = Solve[{xd == 0, yd == 0}, {x, y}, Reals][[1]] // N
D[{xd, yd}, {{x, y}}] /. sol;
Eigenvalues[D[{xd, yd}, {{x, y}}] /. sol] // N
Out[ ]:= {x → 1., y → 3.45972}
Out[ ]:= {-0.000599526 + 0.209724 i, -0.000599526 - 0.209724 i}

In[ ]:= -0.0005995260663507829` * 2
Out[ ]:= -0.00119905

```

---

## Plotting the limit cycles when $g_1 < 0$ , $g_2 > 0$ , $\text{trace}(J) > 0$

### Preparations

```

In[ ]:= Quit

In[ ]:= SetOptions[#, AxesStyle → Arrowheads[Automatic]] & /@
{Plot, ParametricPlot, ListPlot, ListLinePlot};
SetDirectory[NotebookDirectory[]];
SetOptions[#, AxesStyle → Arrowheads[Automatic]] & /@ {Plot, ListPlot,
ListLinePlot, ListLogLogPlot, ParametricPlot, DateListPlot, DiscretePlot};
LaunchKernels[];

```

## The function creating the plots

```

In[ ]:= ClearAll[p, q, x, y, c1, d1, d2, e1, e2, f1, f2];
p[x_, y_] := x2y - xy - c1 x2 - d1 x + e1 y + f1;
q[x_, y_] := -x2y + xy + c1 x2 + d2 x - e2 y + f2;
f1 = 1; f2 = 1;
e1 =  $\frac{3}{10}$ ; d2 =  $\frac{4}{10}$ ;
d1 =  $\frac{c1 (e1 - e2) + e2 f1 + e1 (d2 + f2)}{e2}$ ;
c1 =  $\frac{79}{100}$ ; (*perturbed parameter for trace(J) < 0*)
e2 =  $\frac{633}{1000}$ ; (*perturbed parameter for g1 > 0*)
g1 =  $\frac{-81843 + 215510 e2 - 80800 e2^2 - 71500 e2^3 - 120000 e2^4 + 150000 e2^5}{25 e2 (55851 - 60060 e2 - 125300 e2^2 + 28000 e2^3 + 160000 e2^4)}$ ;
g2 =
- ( (-7163477245732849632 + 108834719548271657265 e2 - 618997960691032506300 e22 +
1654315932275893272000 e23 - 1921827260759476942500 e24 +
895027619630747687500 e25 - 5443787618252766375000 e26 +
23247943465166542500000 e27 - 40625221075278218750000 e28 +
34972974592196812500000 e29 - 20364241867282500000000 e210 +
26751631674075000000000 e211 - 36525826237125000000000 e212 +
205236962100000000000 e213 - 504294771250000000000 e214 +
204237600000000000000 e215 - 406584693750000000000 e216 +
341926812500000000000 e217 - 131812500000000000000 e218 +
117000000000000000000 e219 + 45000000000000000000 e220) /
(300 e2 (-149 + 90 e2 + 200 e22) (96 - 45 e2 - 325 e22 + 250 e23)2
(-96 + 45 e2 - 200 e22 + 500 e23) (55851 - 60060 e2 - 125300 e22 + 28000 e23 +
160000 e24) (78749 - 72900 e2 - 169900 e22 - 60000 e23 + 320000 e24));
{g1, g2} // N
{e2, e1, d2, d1, f1, f2, c1}
{e2, e1, d2, d1, f1, f2, c1} // N
Out[ ]:= {0.00642203, -0.301207}
Out[ ]:= { $\frac{633}{1000}$ ,  $\frac{3}{10}$ ,  $\frac{2}{5}$ ,  $\frac{26331}{21100}$ , 1, 1,  $\frac{79}{100}$ }
Out[ ]:= {0.633, 0.3, 0.4, 1.24791, 1., 1., 0.79}

```



```

In[ ]:= ClearAll[nsol, ev, plotter];
nsol = NSolve[Join@@Thread /@ {{p[x, y], q[x, y]} == 0, {x, y} > 0}, {x, y}, 20] [[1]]
ev = Eigenvalues[D[{{p[x, y], q[x, y]}, {{x, y}}] /. nsol]
plotter[τ_, shift_, ag_ : Automatic, pg_ : Automatic, pp_ : 1000,
  ar_ : Automatic, opts___] := Module[{startingpoint, sys, solution, plot1},
  startingpoint = ({x, y} /. nsol) + shift;
  sys := NDSolveValue[Join[{u'[t] == p[u[t], v[t]], v'[t] == q[u[t], v[t]]},
    Thread[{u[0], v[0]} == startingpoint}],
    {u, v}, {t, τ}, AccuracyGoal → ag, PrecisionGoal → pg, opts];
  trafo[point_] := point;
  solution[t_] := trafo[Through[sys[t]]];
  {ParametricPlot[Evaluate[solution[t]], {t, 0, τ},
    Epilog → {Red, PointSize[0.05], Point[startingpoint], Orange,
      Point[trafo[{x, y} /. nsol]}], PlotRange → All, PlotPoints → pp, AspectRatio → ar,
    AxesLabel → {x, y}, LabelStyle → Directive[14], ImageSize → 350],
    Plot[Evaluate[solution[t] [[1]], {t, 0, τ}, PlotRange → All, PlotPoints → pp,
    AxesLabel → {t, x}, LabelStyle → Directive[12], ImageSize → 250],
    Plot[Evaluate[solution[t] [[2]], {t, 0, τ}, PlotRange → All, PlotPoints → pp,
    AxesLabel → {t, y}, LabelStyle → Directive[12], ImageSize → 250]}}]

Out[ ]:= {x → 1.0000000000000000, y → 3.4597156398104265403}

Out[ ]:= {-0.000599526066350710900 + 0.209724420398826536 i,
  -0.000599526066350710900 - 0.209724420398826536 i}

```

## Plotter with arrow

```

In[ ]:= ClearAll[nsol, ev, plotterarrow];
nsol = First@NSolve[Join@@Thread /@ {{p[x, y], q[x, y]} = 0, {x, y} > 0}, {x, y}, 20]
ev = Eigenvalues[D[{{p[x, y], q[x, y]}, {x, y}}] /. nsol]
plotterarrow[τ_, shift_, ag_ : Automatic, pg_ : Automatic, pp_ : 1000, ar_ : Automatic,
  arrow_, opts___] := Module[{startingpoint, sys, solution, plot1},
  startingpoint = ({x, y} /. nsol) + shift;
  sys := NDSolveValue[Join[{u'[t] == p[u[t], v[t]], v'[t] == q[u[t], v[t]]},
    Thread[{u[0], v[0]} == startingpoint}],
    {u, v}, {t, τ}, AccuracyGoal → ag, PrecisionGoal → pg, opts];
  solution[t_] := Through[sys[t]];
  {ParametricPlot[Evaluate[solution[t]], {t, 0, τ},
    Epilog → {Black, Arrowheads → 0.07, Arrow[{startingpoint, arrow}],
      Red, PointSize[0.05], Point[startingpoint], Orange,
      Point[{x, y} /. nsol]
    }, PlotRange → All, PlotPoints → pp, AspectRatio → ar,
    AxesLabel → {x, y}, LabelStyle → Directive[14], ImageSize → 350],
    Plot[Evaluate[solution[t][[1]], {t, 0, τ}, PlotRange → All, PlotPoints → pp,
      AxesLabel → {t, x}, LabelStyle → Directive[12], ImageSize → 250],
    Plot[Evaluate[solution[t][[2]], {t, 0, τ}, PlotRange → All, PlotPoints → pp,
      AxesLabel → {t, y}, LabelStyle → Directive[12], ImageSize → 250]}}]

Out[ ]:= {x → 1.00000000000000000000, y → 3.4597156398104265403}

Out[ ]:= {-0.000599526066350710900 + 0.209724420398826536 i,
  -0.000599526066350710900 - 0.209724420398826536 i}

```

---

## Figures

### Figure 12

```

In[ ]:= plotter[300, {0, 0.5}, Automatic, 100, 1000, 1, Method → "BDF"]
plotterarrow[300, {0, 0.5}, Automatic, 100, 1000, 1, {1.214, 3.559}, Method → "BDF"]

```

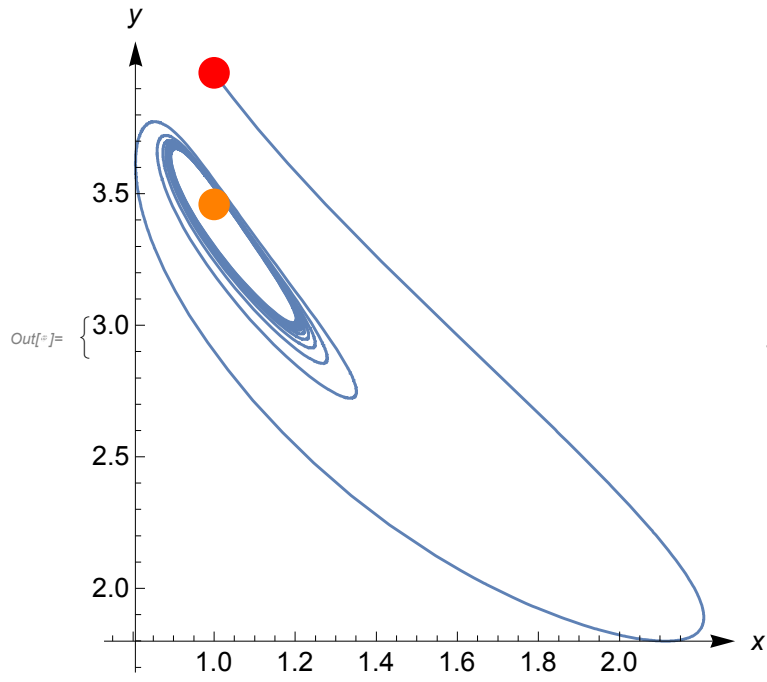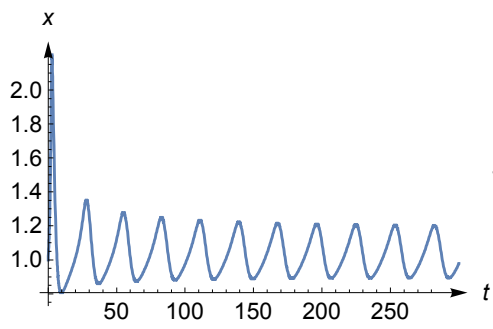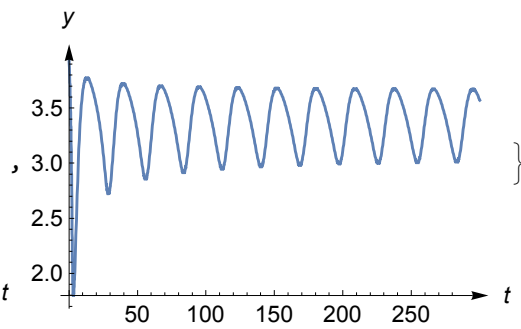

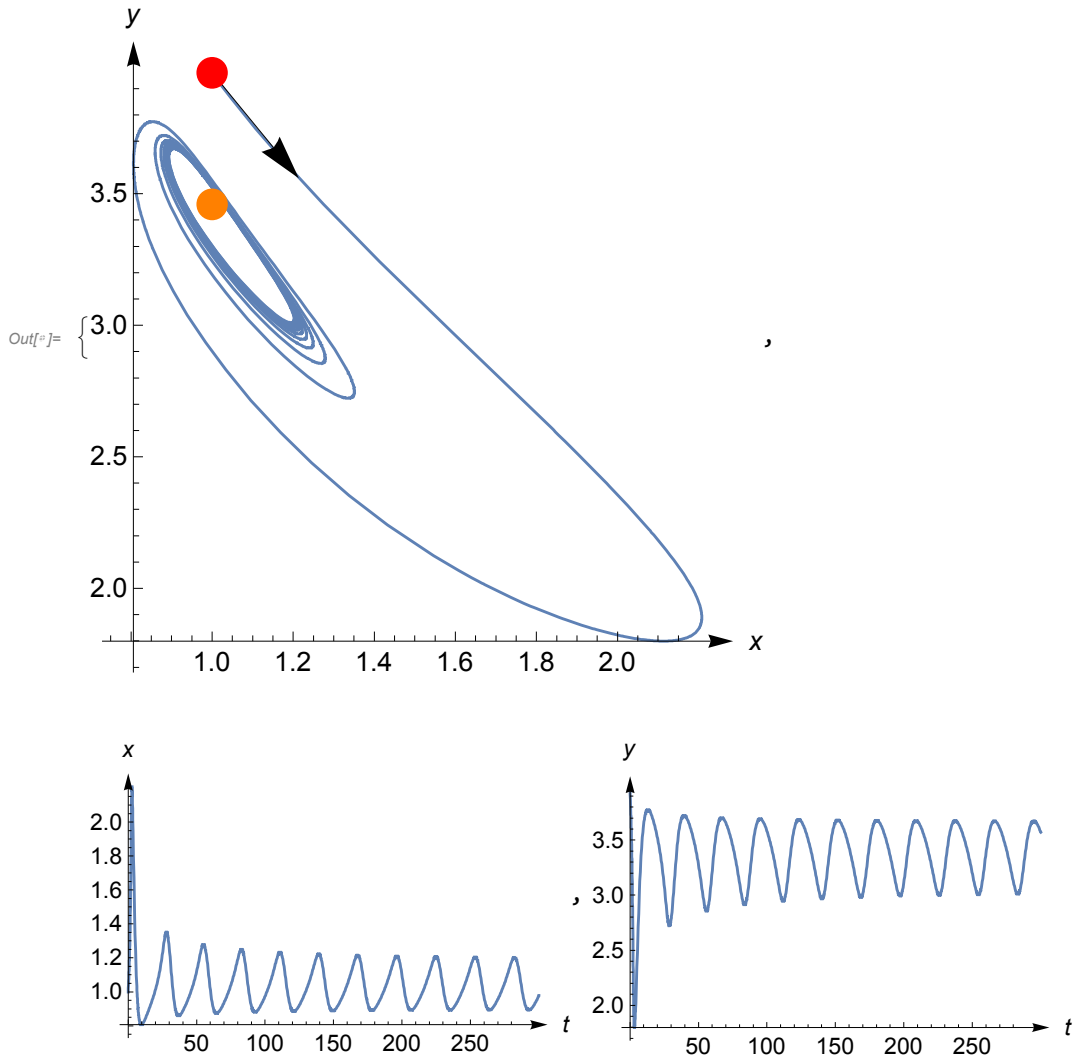

Figure 13

```

In[ ]:= plotter[800, {0, 0.05}, Automatic, 100, 1000, 1, Method -> "BDF"]
plotterarrow[800, {0, 0.05}, Automatic, 100, 1000, 1, {1.05, 3.396}, Method -> "BDF"]

```

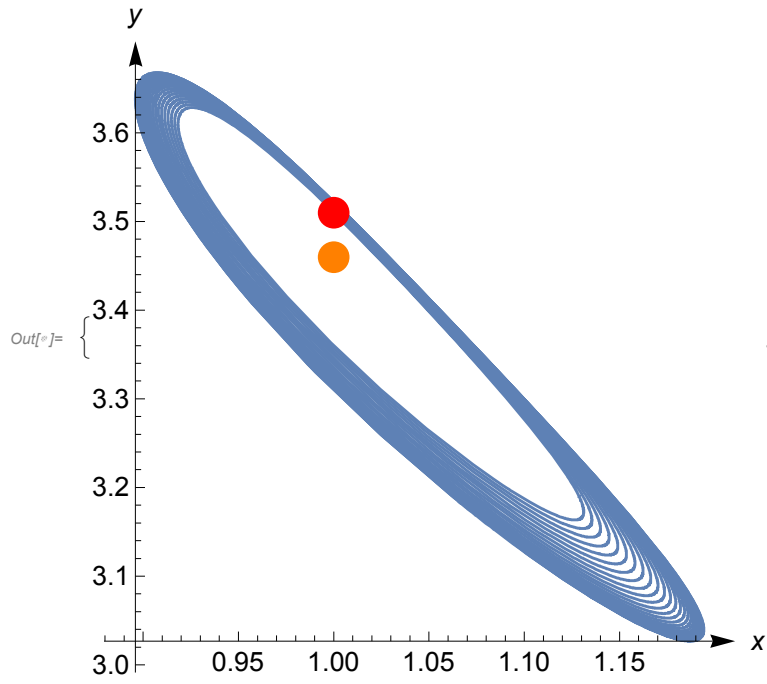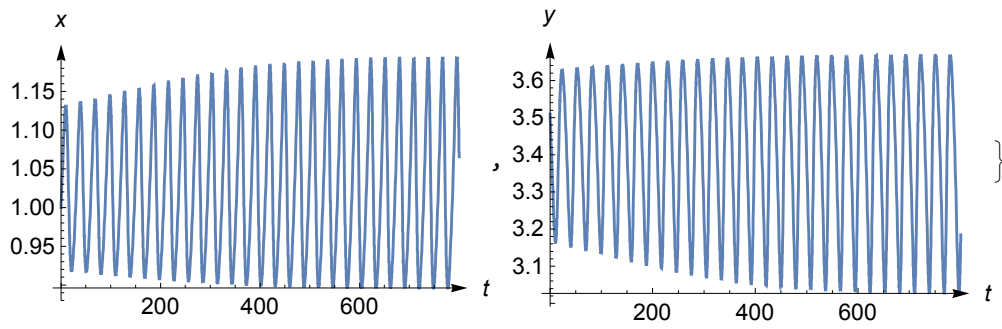

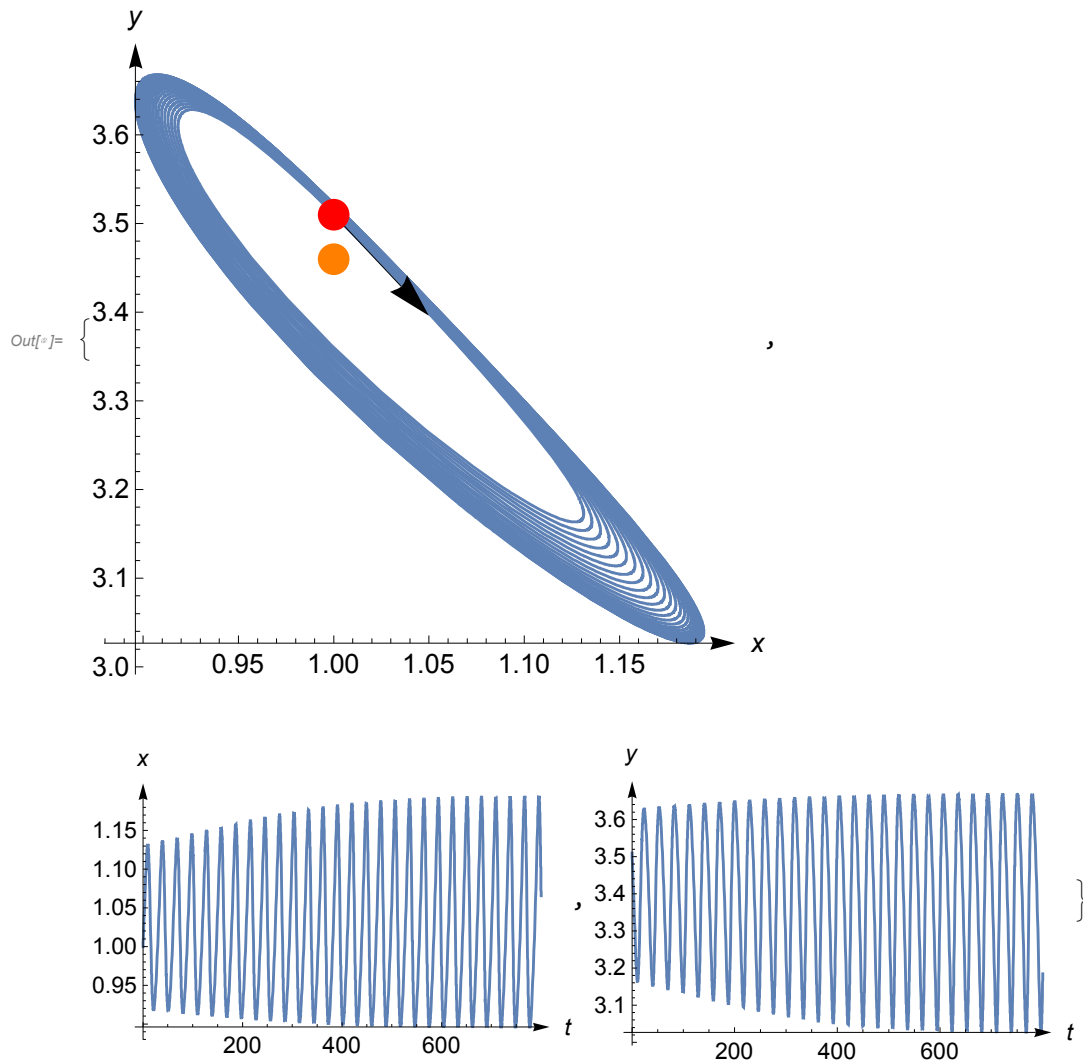

Figure 14

```

In[ ]:= plotter[600, {0, 0.01}, Automatic, 100, 1000, 1, Method -> "BDF"]
plotterarrow[600, {0, 0.01}, Automatic, 100, 1000, 1, {1.005, 3.458}, Method -> "BDF"]

```

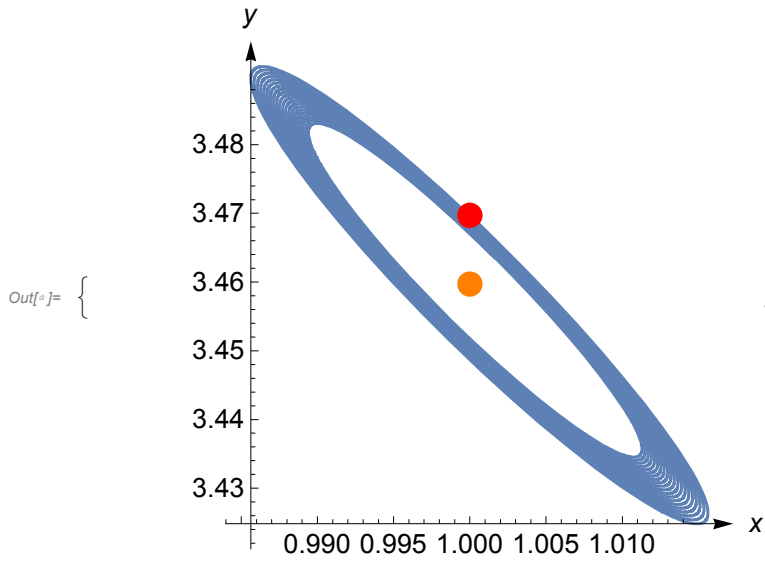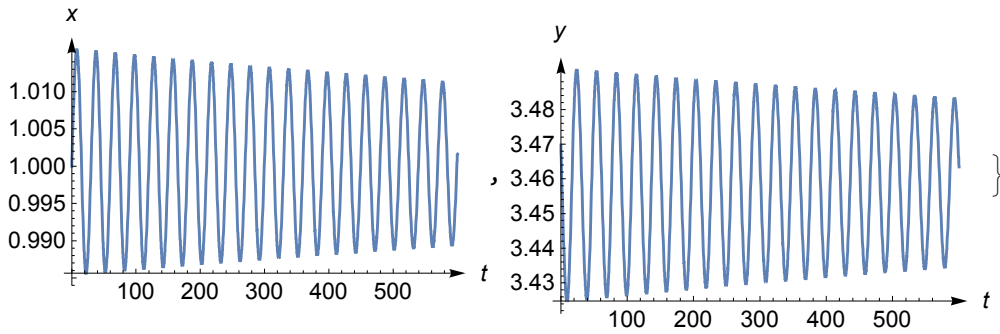

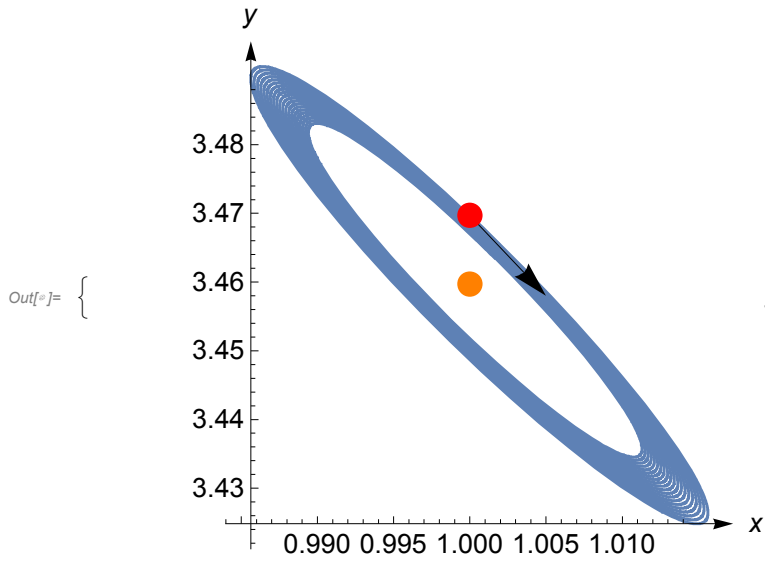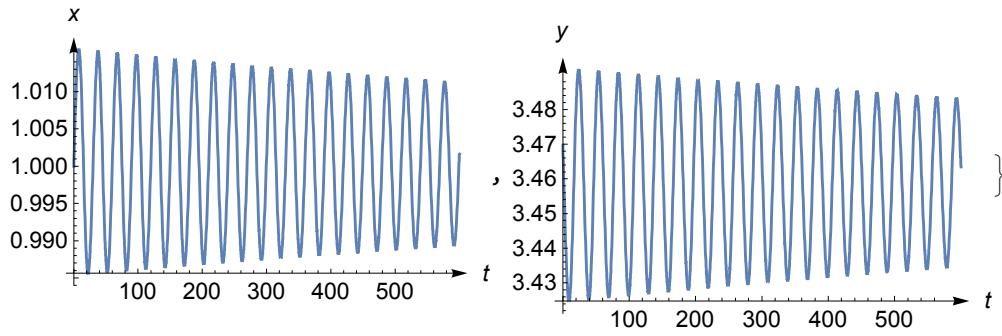

Supplement: Supplementary file 1 [file supplementary]
